# Supplementary material for: Internet-Guided Cognitive Behavioral Therapy for Insomnia Among Patients With Traumatic Brain Injury: A Randomized Clinical Trial
Source: PubMed Central journal article supplement (PMC11234237; doi:10.1001/jamanetworkopen.2024.20090), 2024-07-09
Supplement: jamanetwopen-e2420090-s001.pdf [file jamanetwopen-e2420090-s001.pdf]

1                   **UNIFORMED UNIVERSITY OF THE HEALTH SCIENCES AT BETHESDA, MD**

2  
3                   **GENERAL INFORMATION**

4  
5                   **Protocol Title:**

6                   A Randomized, Controlled, Double-blinded Study of Internet-guided Cognitive Behavioral Therapy for  
7                   Insomnia in Military Service Members with History of Traumatic Brain Injury

8  
9                   **Principal Investigator:**

10                  David L. Brody, MD, PhD  
11                  Professor, Department of Neurology  
12                  Uniformed Services University  
13                  Director, Center for Neuroscience and Regenerative Medicine  
14                  314-537-6453  
15                  david.brody@usuhs.edu

16  
17                  **Associate Investigator(s):**

18                  Martin Cota  
19                  Senior Clinical Trials Specialist  
20                  Henry M. Jackson Foundation  
21                  Center for Neuroscience and Regenerative Medicine  
22                  Uniformed Services University  
23                  301-295-9685  
24                  martin.cota.ctr@usuhs.edu

25  
26                  Alura Johnston  
27                  Senior Regulatory Affairs Specialist  
28                  Henry M. Jackson Foundation  
29                  Center for Neuroscience and Regenerative Medicine  
30                  Uniformed Services University  
31                  301-295-9207  
32                  alura.johnston.ctr@usuhs.edu

33  
34                  John Kent Werner, MD, PhD  
35                  Staff Neurologist / Sleep Medicine Fellow  
36                  Walter Reed National Military Medical Center  
37                  301-346-2696  
38                  john.k.werner.mil@mail.mil

39  
40                  Thaddeus Haight, PhD  
41                  Biostatistician  
42                  Henry M. Jackson Foundation  
43                  Center for Neuroscience and Regenerative Medicine  
44                  Uniformed Services University  
45                  301-295-9700  
46                  thaddeus.haight.ctr@usuhs.edu

47  
48                  Bahareh Kost  
49                  Data Manager  
50                  Henry M. Jackson Foundation  
51                  Center for Neuroscience and Regenerative Medicine

52 Uniformed Services University  
53 301-295-6455  
54 Bahareh.kost.ctr@usuhs.edu

55

56 **Collaborator(s):**

57 Lee M. Ritterband, PhD  
58 Professor, Psychiatry and Neurobehavioral Sciences  
59 University of Virginia School of Medicine  
60 434-924-5988  
61 Lr5b@hscmail.mcc.virginia.edu

62

63

64 **STUDY DETAILS**

65 **Abstract/Summary:**

66

67 *Purpose*

68 To investigate the feasibility and efficacy of Internet-guided Cognitive Behavioral Therapy for  
69 Insomnia (eCBT-I) in active and retired military service members with insomnia and a history of  
70 traumatic brain injury (TBI).

71

72 *Subject Population*

73 Male and female active or retired service members, eligible for care at Department of Defense  
74 (DoD) facilities, between the ages of 18 and 64 with insomnia and a history of TBI.

75

76 *Research Design*

77 Internet-based, double-blinded, controlled, prospective, randomized interventional trial with an  
78 optional subsequent open-label intervention. Up to 200 participants will be randomized to either active  
79 eCBT-I or education control groups in a 3:1 ratio, respectively.

80

81 *Methodology /Technical Approach*

82 This study seeks to validate an eCBT-I program as an alternative to traditional in-person therapy for  
83 participants with insomnia. Up to two hundred (n=200) active or retired service members with history of  
84 TBI will be enrolled over a period of two years. Participants will be randomized to active intervention or  
85 education control groups in a 3:1 ratio, respectively. Participants receiving active eCBT-I will receive  
86 online portal access and follow a 9-week eCBT-I intervention program requiring completion of regular  
87 follow-up and out

88 come assessments via telephone and the Internet. Participants randomized to the control group will  
89 receive insomnia education and monitoring only through a mimetic online education control portal and  
90 will complete a follow-up and outcome assessment schedule identical to the active intervention group.

91 Content available to control participants through the education control portal is not individually tailored  
92 and does not provide an online means for ongoing insomnia symptoms assessment or allow for  
93 documentation of sleep diaries. Participant experience and interaction with the study team will be entirely  
94 electronic or by telephone so as to increase the likelihood of study procedure compliance, potential for  
95 immediate benefit, enrollment, and generalizability to possible policy changes within military health  
96 system (MHS) favoring eCBT-I as first line intervention for insomnia.

97 The primary outcome measure of efficacy will be the Insomnia Severity Index (ISI). Primary analysis of  
98 the primary outcome will be percent improvement in ISI scores assessed pre- and post-intervention in an  
99 "intention to treat" fashion. Secondary analyses of the primary outcome will include "as treated" analyses  
100 and retained improvement in ISI scores assessed between pre-intervention baseline and long-term follow  
101 up at 3 months. Secondary outcome measures will capture known and suspected insomnia precursors,  
102 predictors, or correlates including Posttraumatic Stress Disorder Checklist for DSM-5 criteria (PCL-5),

103 Patient Health Questionnaire 9 for Depression (PHQ-9) with question #3 regarding sleep redacted for  
104 redundancy, and Migraine Disability Assessment (MIDAS). Given that many service members with TBI  
105 also have PTSD, we will use the Pittsburgh Sleep Quality Index (PSQI) with Addendum for PTSD  
106 (PSQI-A) as secondary measures to assess insomnia. Additional secondary outcomes will assess quality  
107 of life through the Functional Assessment of Chronic Illness Therapy for Fatigue (FACIT-F), qualitative  
108 feedback from participants including assessment of blinding efficacy, and study team blinding efficacy.  
109 We will assess attitudes towards telemedicine versus in-person therapies of this type. As part of this  
110 investigation, it is expected that participants will not only significantly benefit from the active  
111 intervention as compared to the control but also increase the likeliness of help-seeking and compliance  
112 behavior given the flexibility, broad availability and immediately impactful benefit of this internet-based  
113 approach.  
114 Study team members interacting with participants will be blinded to group assignment until completion of  
115 long-term follow up, at which point participants randomized to the education control group will be given  
116 the option to receive open-label eCBT-I intervention for an equivalent period of 9 weeks.

#### 118 **Key Words:**

119 Cognitive Behavioral Therapy, Insomnia, Concussion, Mild Traumatic Brain Injury

#### 121 **Background and Significance:**

122  
123 Traumatic Brain Injury (TBI) has emerged as one of the most frequently diagnosed medical  
124 conditions, affecting upwards of 371,000 service members between 2000 and 2017 (Defense and  
125 Veterans Brain Injury Center, 2017). TBI has profound clinical and resource implications for the  
126 Department of Defense (Swanson et al., 2017). Despite being the most common neurological injury  
127 sustained by service members, it is hypothesized that TBI frequently remains undiagnosed and untreated  
128 (Defense and Veterans Brain Injury Center, 2017). A 2007 report from the President's Commission on  
129 Care for America's Returning Wounded indicated that 10-20% of apparently healthy service members  
130 returning from conflicts in Iraq and Afghanistan met diagnostic criteria for concussive TBI, also known as  
131 mild TBI (President's Commission on Care for America's Returning Wounded Warriors, 2007). A high  
132 percentage of these service members with suspected or confirmed TBI are also diagnosed with insomnia  
133 and other sleep disorders.

134  
135 Insomnia sleep disorder is broadly defined as the presence of one or more of the following  
136 symptoms without clear secondary etiological or biological cause: difficulty initiating sleep, difficulty  
137 maintaining sleep, waking up too early, or experiencing nonrestorative or low quality sleep (Roth, 2007;  
138 Ancoli-Israel and Roth, 1999). Recent findings suggest a growing number of active and retired service  
139 members suffer from symptoms of insomnia. In a 2013 study of 110 military personnel returning from  
140 combat within 18 months of deployment, 63.6% of participants met diagnostic criteria for insomnia,  
141 while 62.7% met diagnostic criteria for obstructive sleep apnea (OSA) (Mysliwiec et al., 2013). Other  
142 studies in both military and civilian populations support a growing body of evidence demonstrating  
143 persons sustaining a TBI are more likely to experience insomnia with greater frequency and severity  
144 (Bryan, 2013; Hou et al., 2013; Viola-Saltzman & Watson, 2012; Ponsford et. al, 2012). These collective  
145 findings suggest a markedly higher risk of insomnia among active and retired service members when  
146 compared with the general population, which has an observed incidence of approximately 10%  
147 (Singareddy et al., 2012).

148  
149 Although etiology is unclear, many service members did not have insomnia prior to brain injury,  
150 or their symptoms substantially worsened after initial and repeated injury. Studies investigating an active  
151 duty military cohort have reported incidence of insomnia was 20.4% following single TBI and 50.0% for  
152 those with multiple TBIs (Bryan, 2013). The incidence of insomnia following TBI varies significantly,  
153 with estimates ranging from 30% to as high as 70% (Viola-Saltzman & Watson, 2012; Ponsford et al.,

154 2012). Our current understanding is further complicated by high rates of comorbid disorders, including  
155 depression and posttraumatic stress disorder (PTSD). Not surprisingly, with a large number of TBIs and  
156 its high comorbidity among service members, insomnia is one of the most frequently reported reasons for  
157 mental health referrals in the military (Cozza et al., 2004). While the severity of insomnia is generally  
158 positively correlated with injury severity, the greatest number of persons reporting post-injury sleep  
159 complaints are those with mild TBI (mTBI), which accounts for approximately 83% of reported TBIs  
160 (Department of Defense, 2017). Disconcertingly, recent studies have also shown the frequency of  
161 referrals for insomnia within the US military have risen by as much as 372% between the years 2005 and  
162 2014, indicating a growing awareness and concern for providers that necessitates aggressive prioritization  
163 and intervention (Caldwell et al., 2017).

### 164 165 *Cognitive Behavioral Therapy for Insomnia (CBT-I)* 166

167 The standard intervention approach for CBT-I consists of cognitive-behavioral strategies intended  
168 to improve outcomes in overall sleep quality, staying asleep, and falling sleep. Intervention strategies  
169 focus on sleep-promoting habits and identification of behaviors that may affect a person's ability to  
170 maintain optimal sleep tendencies. For a period of approximately 1-2 weeks, patients are instructed to  
171 maintain sleep diaries that document general information about their sleep habits such as time to rise, time  
172 to bed, number of awakenings, sleep onset latency, time of final awakening, overall sleep quality,  
173 frequency of naps, and similar related questions. The purpose of the initial sleep assessment and  
174 observation period is to establish a baseline for subsequent intervention techniques. In-person visits with  
175 the provider are conducted weekly for 6 or more sessions lasting approximately 2 hours per session  
176 (Morin et al., 2006). Subsequent study visits teach patients specific techniques in several domains.

- 177  
178 1. Stimulus Control advises patients on procedural and lifestyle changes to remove or limit exposure  
179 to sleep-curtailling behaviors. Practitioners will recommend to patients that they avoid partaking  
180 in known stimulatory activities several hours before and during the process of going to bed, such  
181 as avoiding vigorous exercise, caffeine, responding to work emails, and related activities.  
182 Additional practitioner recommendations are designed to reassociate the sleep environment with  
183 sleep and encourage the implementation of healthy routines. These recommendations include  
184 only using the bed for sleep and sexual activity, only going to bed when feeling tired, getting out  
185 of bed when an individual is unable to sleep, establishing a consistent daily waking time, and  
186 avoiding napping. Controlled studies investigating the therapeutic potential of stimulus control  
187 therapy have suggested (Epstein et al., 2012; Morin et al., 1994; Riedal et al., 1998; Turner &  
188 Ascher, 1979).
- 189 2. Sleep Restriction imposes limitations on patients as to the total duration and times of day they  
190 may spend asleep or in bed. Recommended sleep restriction guidelines are developed using  
191 baseline sleep diaries and limit patients to only using their bed during the predicted period of  
192 actual sleep. For example, if a patient reports spending 9 hours in bed daily while only sleeping 5  
193 hours, the patient would be advised to spend only 5 hours in bed per day during specific times.  
194 Adjustments to sleep restriction guidelines are made throughout the therapy course gradually  
195 increasing the allowable time in bed as the patient's sleep efficiency (the time spend asleep / the  
196 time spend in bed) improves. Sleep restriction is hypothesized to be one of the most influential  
197 determinants of therapeutic success when utilized independently or as part of a multi-component  
198 CBT-I approach (Epstein et al., 2012; Morin et al., 1994).
- 199 3. Relaxation therapies are taught to help alleviate cognitive and psychosomatic arousal before bed  
200 (Morin et al., 1994; Turner & Ascher, 1979). Examples of relaxation techniques typically  
201 employed are intended include meditation, thought stopping, imagery training, progressive  
202 muscle relaxation, and biofeedback.
- 203 4. Cognitive Therapy, also known as paradoxical intention, is a technique intended to treat  
204 performance anxiety patients may have regarding sleep. A practitioner will advise the patient to

205 stop making an active effort to sleep under the premise that sleep-related performance anxiety  
206 inhibits successful and natural sleep onset (Morin et al., 1994; Turner & Ascher, 1979).  
207 5. Sleep Hygiene employs various educational components that teach patients about health practices  
208 such as poor diet, limited exercise, substance abuse, other medical conditions, as well as light and  
209 noise exposure and how they may contribute to insomnia (Morin et al., 1994). Although the  
210 therapeutic efficacy of sleep hygiene regimens have not been conclusively demonstrated in  
211 controlled studies, practitioner recommendations are believed to be an important factor of a multi-  
212 component CBT-I intervention (Stepanski & Wyatt, 2003; Morin et al., 1994) Sleep hygiene  
213 employs various educational components that teach patients about health practices such as  
214 exercise, diet, substance abuse, other medical conditions, as well as light and noise exposure and  
215 how they may contribute to insomnia.  
216

217 CBT-I has been extensively validated for efficacy in a general population for lessening of insomnia  
218 symptoms. A recent meta-analysis of randomized controlled studies of CBT-I conducted between 1990  
219 and 2009 confirmed efficacy according to intra-group CBT-I and CBT-I versus control group  
220 comparisons (Okajima et al., 2010). Intra-group comparison of CBT-I efficacy revealed medium to large  
221 effect sizes of intervention on subjective sleep variables at the post-intervention endpoint that were  
222 largely maintained at long-term follow up. Between-group comparisons revealed CBT-I was more  
223 effective than the control condition for improving subjective sleep variables when measured post-  
224 intervention and long-term follow-up. These findings are in agreement with previous literature that shows  
225 CBT-I as effective when compared to placebo intervention with effect sizes of 0.88 for sleep latency  
226 (time spent before successfully falling asleep) and 0.65 for time awake after sleep onset (total duration of  
227 awakenings after initially falling sleep) (Morin et al., 1994; Morin et al., 2006; Buscemi et al., 2005).  
228 Other studies have since confirmed the efficacy of CBT-I as a standalone intervention when compared to  
229 other therapies for insomnia (Davidson et al., 2017; Wu et al., 2015). When compared to drug  
230 interventions, there is also evidence to suggest CBT-I may have equal or greater impact on improved  
231 sleep outcomes than certain pharmaceutical interventions (Mitchell et al., 2012; Jacobs et al., 2004).  
232 Following successful implementation of insomnia intervention, studies have demonstrated potential  
233 health and quality of life improvements in secondary but related domains such as decreased depression  
234 (Taylor et al., 2007) and PTSD (Nappi et al., 2012; Margolies et al., 2013).  
235

236 The primary limitations of CBT-I and challenge for care-seeking patients are a relative paucity of  
237 qualified providers (Davy et al., 2013) and lack of patient reimbursement for online therapy received  
238 outside of Military Healthcare System (MHS). In addition to a shortage of available providers, those able  
239 to provide assistance may be inaccessible or impractical for many patients due to geographic and time  
240 availability considerations. Not surprisingly, patient compliance and feasibility of intervention delivery  
241 are hypothesized to play a significant role in overall efficacy rates, although inconsistent sleep outcomes  
242 and intervention adherence reporting complicate scientific interpretation (Matthews et al., 2013).  
243

244 The inherent limitations of traditional CBT-I may be particularly evident within the MHS (Ulmer  
245 et al., 2017), where patient availability and frequent relocation of military service members or providers  
246 pose additional challenges in for the management of insomnia. In order to help close the patient-  
247 practitioner gap and provide better care, recent trials have utilized actigraphic wristwatches. These  
248 actigraphy wristwatches serve as wearable biofeedback devices capable of capturing traditionally self-  
249 reported outcomes such as sleep onset latency, sleep duration, sleep efficiency, and circadian rhythm data  
250 (Devine et al., 2017; Kravitz et al., 2015). Compared to polysomnography, electroencephalography, and  
251 other traditional “gold standard” biofeedback technology, the use of actigraphy in sleep medicine has  
252 demonstrated reasonable scientific validity and usability (Sadeh, 2011; Morganthaler et al., 2007).  
253 However, while these newer technologies may provide greater sensitivity in conditions such as circadian  
254 rhythm or sleep-schedule disorders when the comparative outcome is polysomnography (Ancoli-Israel et  
255 al., 2003; Sack et al., 2007), recent studies have demonstrated that objective outcomes and self-report

256 measures of sleep quality are only moderately correlated and therefore likely associated with distinct  
257 psychological and biological processes. For instance, Jackowska and colleagues (2016) found that self-  
258 report measures of sleep quality such as the PSQI were predictive of overall psychological wellbeing,  
259 whereas objective measures of sleep duration and efficiency were unrelated to psychological outcomes.  
260 Incidentally, Jackowska et al. also found that sleep duration derived from diaries was highly correlated  
261 with objective duration, yet neither were correlated with psychological wellbeing. In studies specifically  
262 investigating insomnia, actigraphy measures have consistently overestimated sleep time due to users lying  
263 motionless for long periods while attempting to fall asleep (Sadeh, 2011; Hauri and Wisbey, 1992). In  
264 addition, actigraphy watches impose significant cost and logistical burden with still-limited reliability  
265 relative to gold standard sleep medicine technologies found in fully-equipped laboratories (Blackwell et  
266 al., 2008; Marino et al., 2013). Self-reported sleep outcomes have been corroborated for many years as  
267 scientifically valid and pragmatic in the context of numerous insomnia and other sleep-related  
268 investigations (Gagnon et al., 2013; Bastien et al., 2001; Jenkins et al., 2015; Morin et al., 2011;  
269 Carpenter and Andrykowski, 1998; Buysse et al., 1989). Collectively, these studies suggest that self-  
270 report measures of sleep quality such as the PSQI are ideal for determining the effects of disrupted sleep  
271 on overall psychological health and wellbeing. Furthermore, self-report measures such as the ISI and  
272 PSQI have been shown to be particularly sensitive to detecting changes in sleep quality outcomes most  
273 relevant to studying CBT-I (Geiger-Brown et al., 2015).

274

### 275 *Sleep Health Using the Internet (SHUTi)*

276

277 In an effort to address these challenges and provide a robust national care network, an Internet-  
278 guided adaptation of CBT-I (eCBT-I) has recently been developed as a viable alternative to conventional  
279 in-person therapy. Sleep Healthy Using the Internet (SHUTi) was created in 2007 by the University of  
280 Virginia (UVA, 1215 Lee St, Charlottesville, VA 22908) to be an interactive online alternative to in-  
281 person CBT-I for treating adult insomnia sleep disorder. SHUTi is designed to include all intervention  
282 components, techniques, and corresponding benefits associated with traditional CBT-I without potential  
283 availability, financial, or practical limitations that face many patients seeking conventional forms of  
284 assistance.

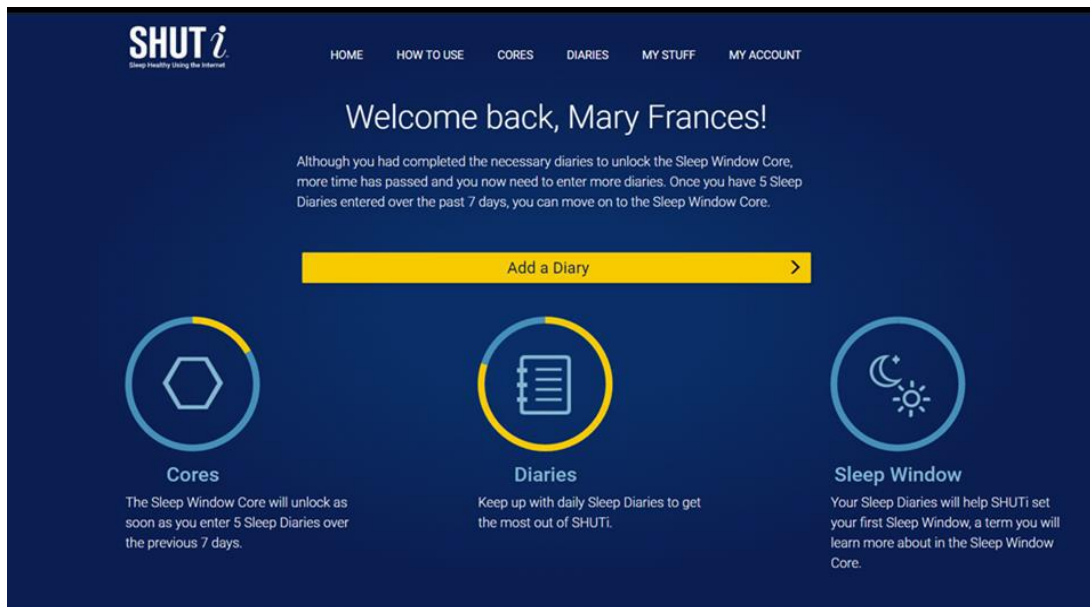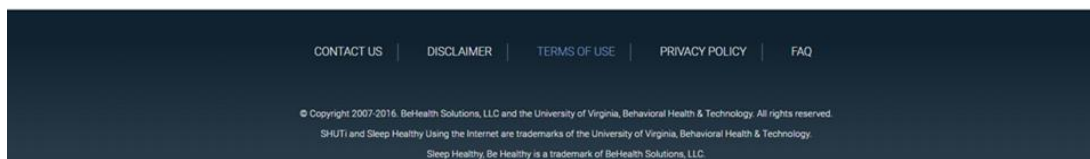

285  
286  
287  
288  
289

**Figure 1.** Example welcome page for SHUTi’s online intervention portal. Patients going through intervention have access to customized insomnia educational modules, sleep diary logs, and learning comprehension assessments.

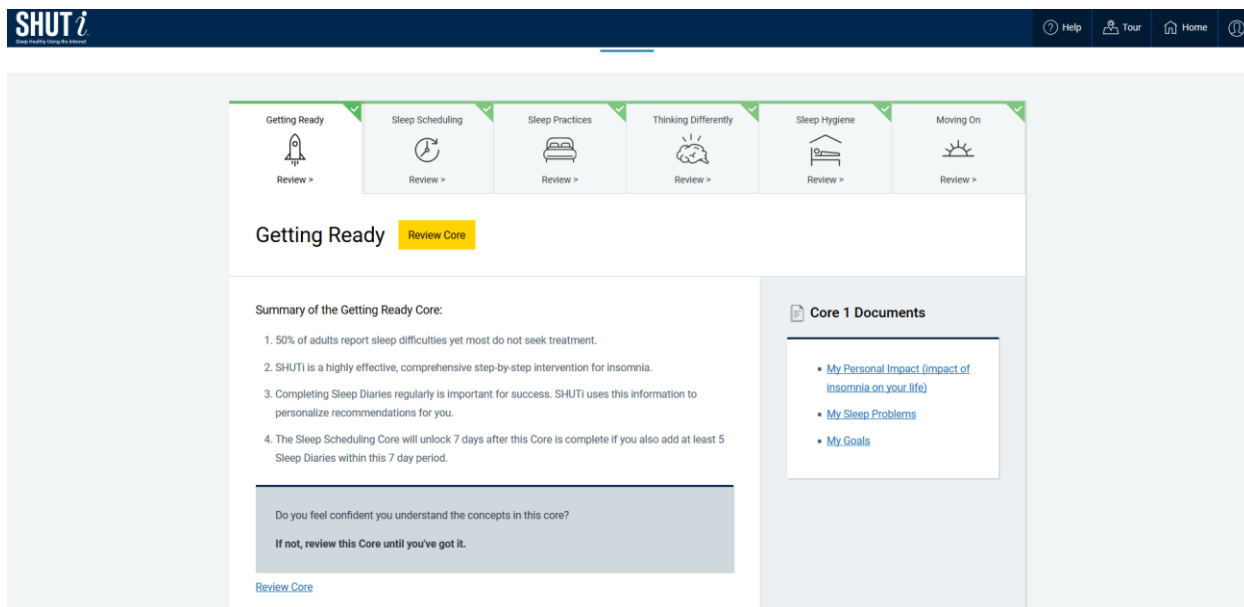

290  
291  
292  
293  
294

**Figure 2.** Example eCBT-I training module, or SHUTi “sleep core”, in which patients are introduced to key behavioral intervention techniques to help decrease their insomnia symptoms. The online portal contains 6 training modules following a week long baseline assessment period.

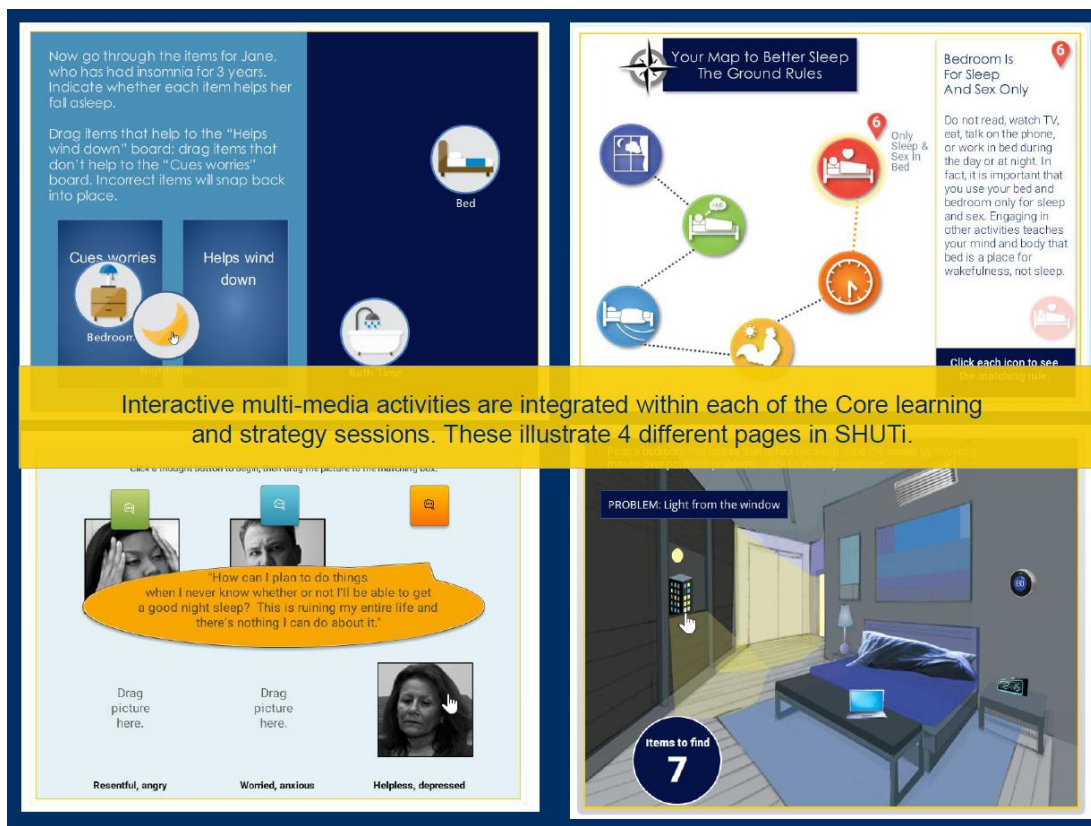

Interactive multi-media activities are integrated within each of the Core learning and strategy sessions. These illustrate 4 different pages in SHUTi.

**Figure 3.** Easy to understand and entertaining quizzes or games assess and improve patient comprehension of training module content.

The Internet-based SHUTi portal is organized into six weekly or bi-weekly scheduled lesson modules, also known as “Sleep Cores”, in which participants will be able to self-educate themselves regarding key intervention techniques adapted from in-person traditional CBT-I content. Each Sleep Core is comprised of a lesson plan and test modules intended to intellectually engage participants and encourage content comprehension.

1. *“Getting Ready”* – Introduces participants to the intervention portal and explains the basic user interface, navigation, and what is to be expected as they progress through the program. Collection of sleep diaries begin immediately in order to establish a insomnia severity baseline.
2. *“Sleep Scheduling”* – The technique of Sleep Restriction is introduced including a brief explanation of theory, common questions, and potential challenges. Participants are given an algorithm-determined sleep schedule to follow which is intended to impose a mild, progressively decreasing, period of sleep limitation.
3. *“Sleep Practices”* – Participants are introduced to the concepts of Stimulus Control and asked to assess their current sleep habits for related areas of potential improvement. A brief knowledge assessment is given in the form of true/false or multiple choice style quizzes. An adjustment or continuation of the previously advised sleep schedule is determined based on change in insomnia severity reported in daily diaries.
4. *“Thinking Differently”* – Participants are encouraged to lessen anxiety an anxiety-provoking behaviors regarding their insomnia. Alternative approaches to managing sleepless nights are encouraged. An adjustment or continuation of the previously advised sleep schedule is determined based on change in insomnia severity reported in daily diaries.



- 321 5. “*Sleep Hygiene*” – Participants learn about the concepts of Sleep Hygiene and how various  
322 seemingly unrelated behaviors, lifestyle activities, and health decisions may be contributing to  
323 their insomnia. An adjustment or continuation of the previously advised sleep schedule is  
324 determined based on change in insomnia severity reported in daily diaries.
- 325 6. “*Moving On*” – Intended to be the final sleep core module in the program, this section reengages  
326 participants with techniques introduced in earlier cores based on self-reported challenges and  
327 changes in insomnia severity during the intervention period. A comprehensive summary of portal  
328 activity, progress, and change in insomnia severity is presented to users. Participants are  
329 encouraged to revisit and work through challenging eCBT-I techniques as well as remain self-  
330 accountable with daily sleep diaries.

331  
332 Studies of SHUTi have demonstrated similar efficacy and tolerability to conventional CBT-I in a general  
333 population. An early investigation in 2009 of 45 adults suffering from insomnia assigned to intervention  
334 (n=22) or control groups (n=23) demonstrated significant improvement in symptoms with decreasing ISI  
335 scores from 15.73 (95% CI, 14.07 to 17.39) to 6.59 (95% CI, 4.73 to 8.45) in the active versus control  
336 groups, with participants retaining improvements at 3 month follow-up (Ritterband et al., 2009).  
337 Participants in the same study demonstrated increases in sleep efficiency and decreases in wake after  
338 sleep onset (Ritterband et al., 2009). The beneficial intervention effects of eCBT-I were examined more  
339 fully in a 2013 follow-up investigation by an associated team of investigators for their relationship to  
340 improvement in quality of life, fatigue, and secondary psychological outcomes resulting from decreased  
341 insomnia severity (Thorndike et al., 2013). The randomized controlled trial of 44 participants receiving  
342 active eCBT-I (n=22) or control (n=22) found notable secondary improvements in depression, anxiety,  
343 and overall mental health for participants receiving active intervention versus the control group  
344 (Thorndike et al., 2013). The most recent and robustly designed trial investigating SHUTi was a  
345 randomized controlled study conducted with 1149 participants in Australia receiving active intervention  
346 (n=574) or control education (n=575) (Christensen et al., 2016). The active group participants received  
347 access to the online SHUTi portal for 9 weeks while control participants received access to HealthWatch,  
348 an Australia-based online health portal designed to provide an attention-matched placebo without any  
349 integrated insomnia or sleep-related interventions, for an equivalent period of time. Researchers showed  
350 significant symptom improvements in active versus control groups for the primary outcome of major  
351 depression co-occurring with insomnia. Secondary outcomes of insomnia severity, suicidality,  
352 generalized anxiety, and overall disability or functional impairment also showed significant  
353 improvements (Christensen et al., 2016). These results provide encouraging evidence as to the potential  
354 efficacy, relevance, and large-scale feasibility of utilizing eCBT-I within the MHS.

### 355 356 ***Related Therapies***

357  
358 Other adaptations to traditional in-person CBT-I have been developed in recent years with  
359 varying success. Brief Behavioral Therapy for Insomnia (BBTI) was developed to be a shortened  
360 adaptation of traditional therapy whereby patients are instructed to complete 4 intervention sessions, 2 of  
361 which may be conducted via telephone, delivered over a 4-week period. The rationale and advantages to the  
362 BBTI adaptation is such that patients may complete intervention in a shorter duration of time with fewer  
363 accessibility and logistical burdens, namely access to a scarce network of providers. BBTI has been  
364 studied for effectiveness in older adults suffering from insomnia with success approaching traditional in-  
365 person therapy (Buysse et al., 2011; Troxel et al., 2013). At present, the majority of investigations  
366 studying the efficacy of BBTI have focused on older adult populations, rather than a demographic  
367 representative of all military TBI patients, which may limit its generalizability. Additionally, BBTI  
368 remains dependent on in-person intervention sessions, which may impose a significant burden on military  
369 TBI patients and dissuade them from seeking help.

370

371 A smartphone-based application was also developed recently in collaboration with the  
372 Department of Veteran Affairs (VA). CBT-I Coach, which aims to provide an interactive service designed  
373 to enhance patient experience for those undergoing CBT-I, is a smartphone application capable of  
374 capturing self-report outcomes, patient feedback, enhanced communication with providers, and  
375 homework modules to improve patient breadth of understanding and overall compliance (Kuhn et al.,  
376 2016). A randomized controlled pilot study for CBT-I Coach in 18 patients undergoing standard  
377 intervention for clinical insomnia examined the application in terms of feasibility, acceptability, and  
378 potential impact on adherence to intervention recommendations and outcomes reporting (Koffel and Kuhn  
379 et al., 2016). While patients reported the application as highly usable and noncompromising in terms of  
380 benefits of CBT-I, no significant added benefit in terms of patient time spent on homework, number of  
381 days completing homework, or number of days completing sleep diaries were observed comparing  
382 application-adjunctive versus control/non-application CBT-I intervention groups (Koffel and Kuhn et al.,  
383 2016). Another study assessing pre- and post-implementation of the smartphone app within VA found  
384 that while a majority of clinicians (87%) believed the app could very likely improve care as initially  
385 reported, less than 60% of patients reported using it two years later (Kuhn et al., 2016). An inherent  
386 limitation of CBT-I Coach is that the application was developed to serve as an adjunctive or  
387 complementary modality along with in-person intervention. Furthermore, CBT-I Coach has not been  
388 tested in large randomized trials to our knowledge. These marked disadvantages greatly limit the  
389 deployability and benefit of CBT-I Coach. Fully independent intervention platforms such as SHUTi  
390 address the shortcomings of both BBTI and CBT-I Coach. Not only is SHUTi designed to act as an  
391 independent, stand-alone intervention, its efficacy has been documented in large randomized controlled  
392 trials.

393

### 394 *Scientific Justification*

395

396 To date, only one published investigation has compared the use of tele-delivered CBT-I to in-  
397 person therapy within a military population to which both interventions were found to be efficacious in  
398 reducing insomnia symptoms (Taylor et. al, 2017). This study suggests a general trend that tele-delivered  
399 therapies tend to be slightly less effective than traditional in-person therapy. However, this finding must  
400 also take into consideration the current lack of clinical resources and subsequent barriers to accessing  
401 assistance facing the majority of insomnia patients within MHS.

402

403 In addition to improved intervention efficacy and availability for insomnia therapy, eCBT-I may  
404 produce significant improvements in secondary outcomes that have particularly significant relevance to  
405 military populations. For instance, multiple studies have examined the link between insomnia and  
406 depression, PTSD, and suicidal ideation. A large university student cohort (n=1149) study of eCBT-I  
407 using SHUTi demonstrated a significant improvement in depression scores as measured by the PHQ-9 at  
408 9 weeks and 6 months following active intervention when compared with controls. (Christensen et al.,  
409 2016). In another study, investigators concluded decreased incidence and severity of insomnia symptoms  
410 may be an important consideration in shaping suicide prevention plans (Ribeiro et al., 2012). Other  
411 studies have demonstrated overlapping neurobiology and symptomology with depression (Benca and  
412 Peterson, 2008; Riemann and Voderholzer, 2003), PTSD (DeViva et al., 2004; Koffel and Khawaja et al.,  
413 2016), and overall suicide risk (Li et al., 2010).

414

415 It is expected that many participants in this study will suffer from longstanding comorbidities that  
416 may demonstrate significant cross-outcome improvements as a result of improved sleep and indirectly-  
417 related health outcomes. Although outside the scope of this investigation, there is evidence to suggest  
418 chronic insomnia increases risk for diabetes (Knutson et al., 2006), heart disease (Phillips et al., 2007),  
419 hypertension (Phillips et al., 2007), and higher rates of overall mortality (Parthasarathy et al., 2015). A  
420 large scale military trial evaluating the feasibility and efficacy of eCBT-I with comorbid TBI could

421 therefore provide significant multi-domain benefits to service members as well as inform future models of  
422 standard care within MHS.

423

424 The investigators have designed the proposed 3:1 imbalanced randomization scheme based on  
425 two key benefits. The emphasis of this investigation is to provide potential immediate therapeutic benefit  
426 to the greatest number of participants possible to which randomization favoring active intervention  
427 facilitates. Additionally, statistical power simulations performed by the study team suggest the greatest  
428 potential to detect effects on military-relevant secondary outcomes in PCL-5 and PHQ-9 scores using a  
429 proportionally larger active intervention group, while not significantly impairing power of the primary  
430 outcome analysis.

431

### 432 *Human Participants Justification*

433

434 CBT-I and other Cognitive Behavioral Therapy (CBT) techniques include a broad toolset of  
435 empirically-validated psychotherapeutic interventional strategies based on present understanding of  
436 human cognition. The foundation of CBT and related therapies rely on the hypothesis that the way an  
437 individual perceives a situation is closely connected to their handling of the situation (Field, Beeson, and  
438 Jones, 2015). Therefore, the most important and impactful components of intervention are those that help  
439 patients change unhelpful or counterproductive thinking and behaviors in ways that cause either direct or  
440 indirect improvement of their condition. These behavioral interventions are the active therapeutic  
441 component of CBT intervention for patients suffering from insomnia or other mood-related conditions,  
442 and they may be viewed as analogous to the active drug compound in a similarly aimed pharmaceutical  
443 intervention. However, unlike many pharmaceutical interventions which represent significant risk in  
444 terms of contraindications and potential side effects, CBT-I employs behavioral techniques intended to  
445 alter subject lifestyle in a way that is naturally favorable to healthy outcomes. Although various  
446 mechanisms have been demonstrated to cause secondary insomnia as a result of foreign substance  
447 administration (Richardson, 2007), medical and psychiatric comorbidity (Doufas et al., 2012), or genetic  
448 alteration (Revel et al., 2009), there are at present no well-studied or scientifically representative animal  
449 models that accurately reproduce the condition of insomnia as experienced by humans. Based on these  
450 considerations, the expected benefits of participation in the proposed study of eCBT-I far outweigh the  
451 potential dangers of participants not receiving assistance for their insomnia.

452

### 453 **Objectives/Specific Aims/Research Questions:**

454

#### 455 *Primary Objective*

456

- 457 • To determine the feasibility and efficacy of active eCBT-I compared to education control for  
458 insomnia in US military service members with history of TBI.
  - 459 ○ *Primary Hypothesis:* Active eCBT-I intervention will lead to greater reductions of  
460 symptoms for insomnia compared to education control in active and retired service  
461 members with history of TBI.
  - 462 ○ *Primary Outcome Measure:* Insomnia Severity Index (ISI) (Gagnon et al., 2013; Bastien  
463 et al., 2001; Morin et al., 2011)
  - 464 ○ *Primary Analysis (Intention to Treat):* Comparison of changes in ISI scores from baseline  
465 to post-intervention between those randomized to active eCBT-I versus education  
466 control. A clinically meaningful change will be defined as a  $\geq 25\%$  reduction in total  
467 symptom score.
  - 468 ○ *Secondary Analyses:*
    - 469 ■ Comparison of changes in ISI scores from baseline to post-intervention between  
470 those who fully complete active eCBT-I versus those assigned to education  
471 control (“as treated” analysis)

- 472                   ▪ Comparison of retained change in ISI scores from baseline to 3 month follow-up  
473                   in intention-to-treat and as-treated analyses.  
474                   ▪ Fraction of participants with ISI <15, below threshold for clinically significant  
475                   insomnia, at post-intervention and 3 month follow-up time points.  
476

### 477 *Secondary Objectives*

- 478
- 479     • To assess changes in depression symptom severity as reflected by the Patient Health  
480     Questionnaire 9 for Depression (PHQ-9) (Kroenke et al., 2001).
    - 481         ○ *Primary Analysis:* Comparison of changes in PHQ-9 scores from baseline to post-  
482         intervention between those randomized to active and education control.
    - 483         ○ *Secondary Analysis:* Comparison of changes in PHQ-9 scores from baseline to 3 month  
484         follow-up between those randomized to active and education control.
  - 485     • To assess changes in PTSD-related symptoms as reflected by the PTSD Checklist for DSM-5  
486     (PCL-5) (Belvins et al., 2015).
    - 487         ○ *Primary Analysis:* Comparison of changes in PCL-5 scores from baseline to post-  
488         intervention between those randomized to active and education control.
    - 489         ○ *Secondary Analysis:* Comparison of changes in PCL-5 scores from baseline to 3 month  
490         follow-up between those randomized to active and education control.
  - 491     • To assess changes in migraine-related symptoms as reflected by the Migraine Disability  
492     Assessment (MIDAS) (Stewart et al., 2001).
    - 493         ○ *Primary Analysis:* Comparison of changes in MIDAS scores from baseline to post-  
494         intervention between those randomized to active and education control.
    - 495         ○ *Secondary Analysis:* Comparison of changes in MIDAS scores from baseline to 3 month  
496         follow-up between those randomized to active and education control.
  - 497     • To assess changes in sleep quality as reflected by the Pittsburgh Sleep Quality Index (PSQI)  
498     (Grandner et al., 2006) with Addendum for PTSD (PSQI-A) (Germain et al., 2005).
    - 499         ○ *Primary Analysis:* Comparison of changes in PSQI and PSQI-A scores from baseline to  
500         post-intervention between those randomized to active and education control.
    - 501         ○ *Secondary Analysis:* Comparison of changes in PSQI and PSQI-A scores from baseline to  
502         3 month follow-up between those randomized to active and education control.
  - 503     • To assess changes in fatigue-related symptoms as reflected by the Functional Assessment of  
504     Chronic Illness Therapy-Fatigue (FACIT-F) (Butt et al., 2013)
    - 505         ○ *Primary Analysis:* Comparison of changes in FACIT-F scores from baseline to post-  
506         intervention between those randomized to active and education control.
    - 507         ○ *Secondary Analysis:* Comparison of changes in FACIT-F scores from baseline to 3 month  
508         follow-up between those randomized to active and education control.
  - 509     • To assess changes in sleep diary outcomes and calculated sleep efficiency: bed time, sleep onset  
510     latency, number of awakenings, total duration of awakenings, wake time, arising time, daytime  
511     naps, soundness of sleep, sleep quality, and sleep medication or alcohol use.
  - 512     • To assess investigator blinding efficacy as reflected by mid-intervention and post-intervention  
513     questionnaires to be completed by the study team.
  - 514     • To assess participant expectation of benefit and blinding efficacy as reflected by pre-intervention  
515     and post-intervention questionnaires.
  - 516     • To assess concurrent medications, psychotherapeutic therapies, or lifestyle changes, specific  
517     CBT-I training techniques, and their correlation with intervention efficacy.
  - 518     • To assess participant satisfaction and help-seeking behavior as reflected by a 3 month follow-up  
519     questionnaire.
- 520

### 521 **Study Design:**

522 Internet-based, double-blinded, controlled, prospective, randomized interventional trial with an  
523 optional open-label intervention. Up to 200 participants will be randomized to either eCBT-I or education  
524 control groups in a 3:1 ratio, respectively.  
525

526 **Target Population:**

527 Study design is intended to be as inclusive as possible for all interested participants while  
528 retaining basic scientific and logistical controls. Results from this study are expected to be specifically  
529 relevant for patients within MHS suffering from insomnia with history of TBI.  
530

531 **Benefit to the DoD:**

532 Strong empirical evidence in recent years supporting the use of CBT-I intervention for insomnia  
533 has led to its adaptation as a first-line intervention for many institutions and healthcare professionals  
534 (Siebern & Manber, 2011; Taylor & Pruiksma, 2014). Unfortunately, this recommendation has not been  
535 fully implemented within the MHS standard of care due to the geographic complexities of military life,  
536 limited numbers of trained CBT-I providers, and heavily burdened psychological health centers. For these  
537 reasons, current therapeutic strategies favor pharmacological interventions directed at primary psychiatric  
538 comorbidities such as major depression disorder, PTSD, and suicidality. A remotely-accessible  
539 intervention platform would enable dramatically greater numbers of MHS patients to benefit from  
540 available intervention options.  
541

542 eCBT-I intervention has the inherent benefits of improved safety and limited side effects  
543 when compared to currently utilized drug therapies (Mitchell et al., 2012). This may be of particular  
544 benefit to active and retired service-members suffering from previous injuries that require multiple long-  
545 term drug therapies and potentially side effects or contraindications.  
546

547 eCBT-I also presents an opportunity to reduce the personnel and financial burden within MHS. A  
548 standard intervention course of self-guided eCBT-I costs approximately \$75 per patient, whereas  
549 traditional therapy costs \$1200 to \$1800 per patient with weekly 2-hour sessions for a period of 6 or more  
550 weeks. A recent cost analysis of TBI care within the VA estimated total expenditure to be \$2.2 billion in  
551 the coming 10 years (FY2016-FY2025) (Bagalman, 2015). As noted, eCBT-I is expected to significantly  
552 improve insomnia as well as secondary outcomes relating to depression and PTSD. These combined  
553 maladies represent a significant portion of the resource and financial cost of TBI within MHS.  
554

555 The UVA will consult with the investigators in developing a customized investigational plan  
556 using the online SHUTi portal. As part of the customization processes, standard patient vignettes,  
557 testimonials, and other online materials previously developed for a non-military-specific audience will be  
558 modified to be appropriate for the targeted intervention population. The modifications also include direct  
559 integration of study outcome measures in the form of paired online pop-up windows through the  
560 partnering survey provider company, Qualtrics (333 West River Park Drive, Provo, UT 84604). This will  
561 allow for an intuitive online environment that is easy for participants to complete as they navigate through  
562 the SHUTi portal. For the proposed investigational study, integrated Qualtrics forms will be tailored to  
563 collect specific outcome measures relying on self-report in a scalable and standardized format that meets  
564 21 CFR Part 11 and HIPAA-compliant information system security guidelines. It is worth noting that the  
565 proposed investigation is entirely funded by the CNRM and is not privately sponsored or supported by  
566 external parties. Services at UVA and Qualtrics are being engaged at-cost and as such may not put any  
567 restrictions or contingencies on the analysis, dissemination, or publication of study findings regardless of  
568 the outcomes.  
569

570 If the expected positive outcomes are obtained, the results of this study may inform clinical policy  
571 and support the immediate implementation of eCBT-I as a first-line intervention for insomnia within the

572 MHS. This potential change in standard of care would have a tremendous impact on quality of life for  
573 active and veteran service members suffering from insomnia.

574

575

576 **STUDY PROCEDURES AND DATA MANAGEMENT**

577 **Study Procedures:**

578 *Describe step-by-step how the study will be conducted from beginning to end*

579

580 ***Procedures***

581 This study will be a double-blinded, controlled, prospective randomized trial with up to 200  
582 participants. An overview of the participant timeline is presented below.

583

584

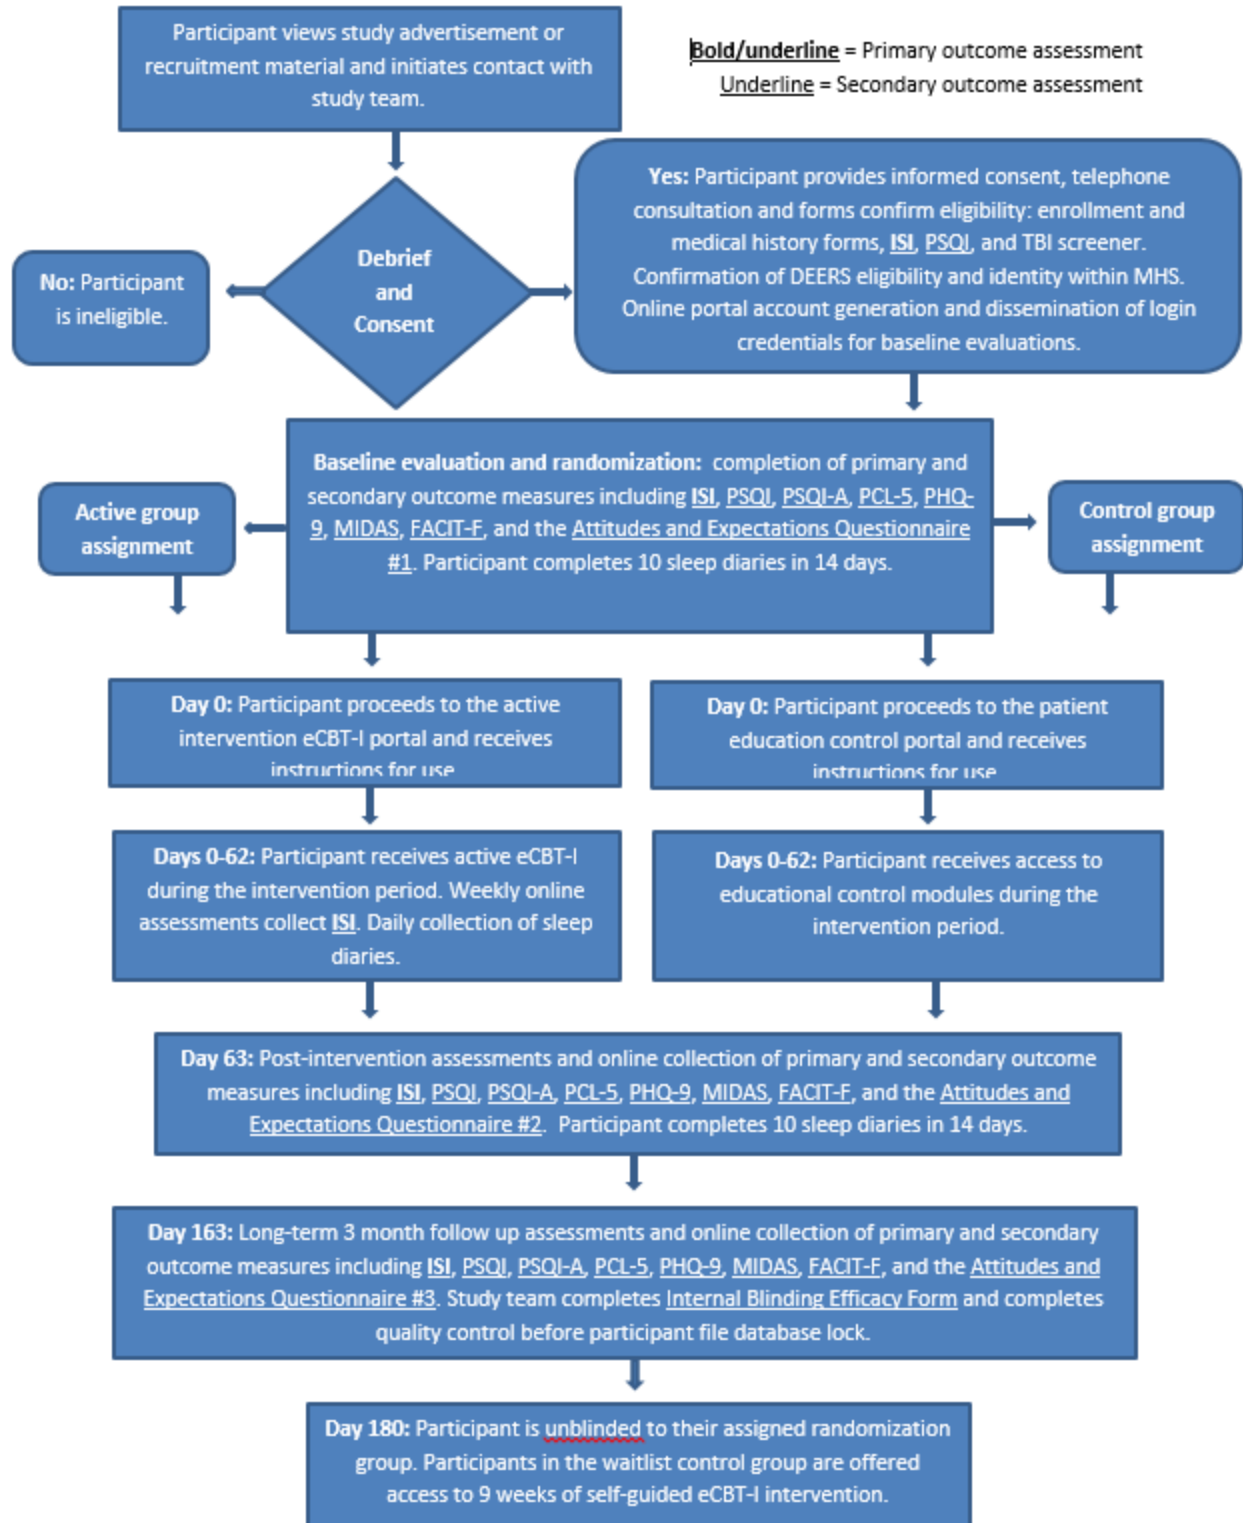

585  
 586  
 587  
 588  
 589  
 590

**Baseline Evaluation**

Participants will complete their baseline evaluation after consent and upon enrollment into the study. Successful completion of the baseline evaluation will be documented in two processes: (1) a telephone consultation following consent that emphasizes screening of relevant medical history and

591 inclusion-exclusion criteria and (2) primary and secondary outcome assessments administered through the  
592 online portal. All assessments and forms have been submitted with this proposal. For a description of  
593 each measure, see the section titled ‘Data Collection’.

594

595 The baseline evaluation will include:

596

- Review and electronic signature of Informed Consent for participation and medical review

597

- Enrollment Forms

598

- Participant Contact Information

599

- Demographics Questionnaire

600

- Global Unique Identifier (GUID) Request

601

- Medical History Forms

602

- Basic Medical History including medications, current, and previous therapies for insomnia or other sleep disorders

603

- TBI Screener

604

- Primary Outcome Assessment

605

- Insomnia Severity Index (ISI)

606

- Secondary Outcome Assessments

607

- Posttraumatic Stress Disorder Checklist for DSM-5 (PCL-5)

608

- Patient Health Questionnaire 9 (PHQ-9)

609

- Pittsburgh Sleep Quality Index (PSQI)

610

- Pittsburgh Sleep Quality Index Addendum for PTSD (PSQI-A)

611

- Migraine and Disability Assessment (MIDAS)

612

- Functional Assessment of Chronic Illness Therapy for Fatigue (FACIT-F)

613

- Attitudes and Expectations Questionnaire

614

615

616 To remain clinically pragmatic and inclusive to all interested patients, participants will not be  
617 required to discontinue current therapy for insomnia or concurrent conditions and will be advised to  
618 continue following all recommendations from their standard of care clinical provider. This includes  
619 continuation of any medication regimen or behavioral therapy, so long as the participant has not currently  
620 or previously received CBT-I intervention and meets all other inclusion and exclusion criteria.

621

622 Participants not meeting the eligibility criteria as assessed during the baseline evaluation will be  
623 documented as screen failures. Furthermore, patients will not be required to use actigraphy to monitor  
624 sleep because of the pragmatic challenges of doing so and the generally good correlations between  
625 actigraphy and self-report measures of insomnia.

625

626 The baseline phone evaluation will require approximately 1 hour to complete including review of  
627 informed consent, completion of enrollment and medical history forms, medications, and TBI Screener.  
628 Participant access to the online portal login and credentials is expected to take approximately 3 days for  
629 account generation. Following account generation, participants will be prompted to login to the online  
630 portal, confirm their access, and complete baseline surveys for the primary and secondary outcome  
631 assessments. The entire process of baseline evaluation from time of consent to collection of all outcome  
632 assessments is expected to take approximately one week.

633

### 634 ***Intervention Period Evaluations (Days 0-62)***

635

636 Eligible participants will be randomly-assigned by computer to active or education control groups  
637 in a 3:1 ratio, respectively. A block randomization schedule will be developed to ensure balanced group  
638 assignments. There are too many potentially interested clinical subgroups to allow meaningful blocked  
639 randomization (for additional details, see section titled ‘Statistical Analysis Plan’) and no evidence to date  
640 that specific subgroups of patients respond differentially to CBT-I. The randomization schedule will be  
641 maintained by the study data manager and will link participants coded study identification numbers with  
642 their randomized group assignment.



642 The regulatory monitor will be blinded to group assignment unless otherwise required due to  
643 safety and reporting considerations. The principal investigator (PI), biostatistician, and all study personnel  
644 interacting with participants will be blinded to group assignment as well. The data manager will be  
645 unblinded to group assignment and responsible for final data quality control.

646

647 Study participants will routinely access the online portal during the intervention period allowing  
648 them to complete study modules and outcome assessments specific to their assigned study group  
649 schedule.

650

651 Arm 1, active CBT-I intervention:

- 652 1. Participants receive 9 weeks of active CBT-I through the online program. As part of the program,  
653 participants receive self-guided educational reading modules, patient testimonials and vignettes,  
654 and brief quizzes to improve learning and comprehension of key CBT-I techniques. The online  
655 portal is designed for a personal computer or tablet device but works well on most modern  
656 smartphones with large screens. Participants will be able to complete the active eCBT-I in as little  
657 as 6 weeks. The 9-week window is designed to allow flexibility in situations where participants'  
658 ability to complete eCBT-I related activities may be temporarily interrupted. See Figures 1-3  
659 regarding example content accessible through the active intervention portal.
- 660 2. Participants are instructed to complete daily sleep diaries including self-reported bed time, sleep  
661 onset latency, number of awakenings, total duration of awakenings, wake time, arising time,  
662 daytime naps, soundness of sleep, sleep quality, and sleep medication or alcohol use.
- 663 3. The online portal will require participants to complete sleep diaries a minimum of 5 days each  
664 week for the beginning and final two weeks, or for 4 weeks cumulatively, of the intervention  
665 period.
- 666 4. The online portal will require participants complete the ISI weekly during the intervention period.

667

668

669 Arm 2, patient education control program:

- 670 1. Participants are given 9 weeks access to the patient education control program, an online portal  
671 designed to inform participants about healthy lifestyle activities and general insomnia  
672 information. Participation in the control portal provides participants with access to information  
673 about insomnia that they would externally access through websites such as WebMD or The  
674 National Sleep Foundation homepage. Education control group participants are requested to read  
675 educational modules to control for attention-matching when compared to active eCBT-I  
676 intervention. User experience, design, and logistical details for the control portal are designed by  
677 the study team to match all components of the active group procedures excluding utilization of  
678 established CBT-I intervention techniques. Participant experience in the control portal is non-  
679 dynamic and does not provide ongoing feedback in response to outcome assessment results or  
680 reported insomnia symptoms. See Figures 4-6 regarding example content accessible through the  
681 education control portal.
- 682 2. The online portal will require participants to complete sleep diaries a minimum of 5 days each  
683 week for the beginning and final two weeks, or for 4 weeks cumulatively, of the intervention  
684 period.

685

HOME MY ACCOUNT

This educational site provides information about insomnia. It was developed at the University of Virginia with funding from the National Institutes of Health.

On this site you can read about the following:

- [Insomnia Symptoms](#)
- [The Impact of Insomnia](#)
- [Prevalence of Insomnia](#)
- [Causes of Insomnia](#)
- [Stress and Sleep](#)
- [Insomnia and Lifestyle](#)
- [Insomnia and Sleep Environment](#)
- [Insomnia and Sleep Habits](#)
- [When to See a Doctor?](#)

For general or technological questions about this program, please refer to our FAQs. If you still have questions, please email [careforRvets@myshuti.com](mailto:careforRvets@myshuti.com) or call 1-434-422-9090.

If you have questions regarding the VETS SLEEP Study or ClinCard payments please contact Laurel Gaeddert at 1-720-955-0424.

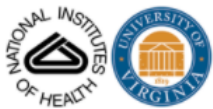

686  
687  
688  
689  
690

**Figure 4.** Example educational pages available to education control participants through the online education control portal. Information available is generalized and non-specific to the subject based on reported insomnia symptoms and severity.

[HOME](#)
[MY ACCOUNT](#)

## Prevalence of Insomnia

Between 30-50% of adults experience symptoms of insomnia from time to time. However, almost everybody experiences sleep difficulties at some point in their life.

- Approximately 10% of adults have diagnosable chronic insomnia.
- 10-20% has insomnia symptoms at least 3 nights each week.
- Between one-third and one-half experience at least one of four main symptoms of insomnia: trouble falling asleep, waking many times during the night, waking too early, and not feeling refreshed upon waking.
- 100%: Nearly everyone has sleep difficulties at one time or another.



< Previous

Next >

691  
692  
693  
694  
695

**Figure 5.** Example educational pages available to education control participants through the online education control portal. Information available is generalized and non-specific to the subject based on reported insomnia symptoms and severity.

[HOME](#)
[MY ACCOUNT](#)

## The Impact of Insomnia

Poor sleep at night is likely to have negative effects on a person's life. Read below to learn more about the difficulties frequently reported by people with insomnia:

### Daytime fatigue

Daytime fatigue is one of the main consequences of insomnia. This often translates into mental tiredness and difficulty with concentration and memory. Motivation is reduced, and great effort can be needed to accomplish even simple and routine tasks. Moments of inattention can cause people to misplace things or to question whether they have already done something they planned to do. Some people even report confused thinking and impaired decision making.

### Feelings and mood

Many people with insomnia also experience feelings of anxiety or depression. In some cases, the insomnia leads to the emotional distress, and in other cases, the emotional distress leads to the insomnia.

### Relationships

Insomnia can also take its toll on family and social relationships. It is more difficult to cope with minor irritations after a poor night's sleep, and interactions with friends, family members, or co-workers can be less enjoyable. At times, there can even be a sense of social isolation. Insomnia can make people feel more intimidated or irritated by others, which can lead to social withdrawal and avoidance of certain people or situations.

696

697 **Figure 6.** Example educational pages available to education control participants through the online  
 698 education control portal. Information available is generalized and non-specific to the subject based on  
 699 reported insomnia symptoms and severity.

700  
 701

702 ***Post-intervention Evaluation (Day 63)***

703 The post-intervention evaluation includes a repeat evaluation of the primary and secondary  
 704 outcome measures that were conducted at the baseline evaluation. Scheduling of this evaluation into  
 705 single or several online sessions is permissible to accommodate participant availability so long as all data  
 706 is collected within 10 days of intervention completion.

707

708 ***3 Month Follow-Up Evaluation (Day 163)***

709 The 3 month follow-up evaluation includes a repeat evaluation of the primary and secondary  
 710 outcome measures that were conducted at the baseline evaluation. Scheduling of this evaluation into  
 711 single or several online sessions is permissible to accommodate participant availability so long as all data  
 712 is collected within 10 days of the 3 month time point following intervention completion. The study team  
 713 will also complete the internal blinding efficacy form immediately following completion of the 3 month  
 714 follow up evaluation.

715

716 ***Open-Label Intervention (Day 180):***

717 After completion of the 3 month follow-up evaluation and internal blinding efficacy form, data regarding  
 718 each participant is given a quality control review prior to participant finalization (e.g., participant file  
 719 database lock). Quality control reviews and participant file database locks are performed on a rolling basis  
 720 as the study progresses. After data locking, participants are then contacted and unblinded as to their group  
 721 assignment. Participants randomized to the education control group will be offered free-of-charge access  
 722 to open-label eCBT-I intervention for a period of 9 weeks. No additional data collection will be  
 723 performed following completion of a participant's data lock and unblinding. However, the study team will  
 724 facilitate continued technical and logistical support for participants deciding to participate in the open-  
 725 label intervention. Once a given participant completes the main study period, the blind is broken and if  
 726 the participant had been randomized to the control group they will be offered the actual intervention.  
 727 In order to preserve the equipoise of the study team, until the trial is completed (i.e each patient has  
 728 completed participation and the data have been cleaned) no efficacy analyses of aggregate data will be  
 729 conducted, other than the interim analyses already specified in the protocol.

730

731 **Team Member Roles and Responsibilities:**

| Name           | Responsibilities                                                                                                                                             | Access to identifiable information? |
|----------------|--------------------------------------------------------------------------------------------------------------------------------------------------------------|-------------------------------------|
| David Brody    | Principal investigator, protocol design and overall management, design of intervention portal, interpretation results, handling of safety events             | Yes                                 |
| Martin Cota    | Associate Investigator, protocol design, clinical interaction blinded to randomization, recruitment, interpretation of results, regulatory correspondences   | Yes                                 |
| Alura Johnston | Associate Investigator, protocol design, clinical interaction unblinded to randomization, recruitment, interpretation of results, regulatory correspondences | Yes                                 |
| Baharer Kost   | Associate Investigator, primary database designer and data quality control                                                                                   | Yes                                 |

|                 |                                                                                                                                                                                                                   |    |
|-----------------|-------------------------------------------------------------------------------------------------------------------------------------------------------------------------------------------------------------------|----|
| Kent Werner     | Associate Investigator, protocol design, scientific advisor, interpretation of results                                                                                                                            | No |
| Thaddeus Haight | Associate Investigator, protocol design, scientific advisor, statistical design, interpretation of results                                                                                                        | No |
| Lee Ritterband  | Collaborator at University of Virginia, design of intervention portal, protocol design, scientific advisor, interpretation of results, point of contact regarding administrative matters at the UVA and Qualtrics | No |

732

733

734 **Data Collection:**

735

736 ***Method of Collection from Participants and Investigators***

737 The following types of information will be collected by study investigators. Assessments will be  
738 administered for research purposes only.

739

740 A description of each data type will follow:

741

- 741 ● Enrollment Forms
- 742 ● Medical History Forms
- 743 ● Primary Outcome Assessment
- 744 ● Secondary Outcome Assessments
- 745 ● Internal Blinding Efficacy Form

746

747 ***Enrollment Forms***748 *Timepoint:* baseline (within 10 days prior to initiating intervention)

749 *Data Gathered:* Enrollment forms are designed to collect participant demographic information. Forms  
750 will be completed after consenting during a baseline telephone interview and will be labeled with coded  
751 patient identifiers and dates of collection.

752

- 753 ● *GUID Request:* The GUID is used to assign an ID number to the participant. The process for  
754 assigning a GUID is described in the section ‘Managing Data (Data Management and/or Sharing  
755 Plan) for this Study’. The self-report form will take 1-2 minutes to complete.
- 756 ● *Participant Contact Information:* The Participant Contact Information form collects emergency  
757 and participant contact information to be used throughout their participation including name,  
758 primary and secondary phone numbers, email address, and physical address. Information on  
759 additional contact sources (family members, friends, other service members, etc.) will be  
760 requested in order to increase the likelihood of complete data collection at later time points.  
761 However, provision of additional contact source information will be optional. The self-report  
762 form takes approximately 3-5 minutes to complete.
- 763 ● *Demographics Questionnaire:* The Demographics Questionnaire contains questions pertinent to  
764 this research effort, including: educational background, military service, etc. The self-report form  
765 will be labeled with coded patient identifiers and dates of collection.

766

767 ***Medical History Forms***768 *Timepoint:* baseline

769 *Data Gathered:* Medical history forms are designed to collect participant medical history relevant to the  
770 study inclusion/exclusion criteria and specific aims. Forms will be completed after consenting and  
771 transcribed via telephone interview labeled by coded patient identifier and date of collection.

772

- 773
- 774 • *Basic Medical History*: The Basic Medical History Form will collect general medical information  
775 from participants including: medical history, concomitant medications/therapies, injury-related  
776 outcomes, and medication history. The basic medical history form will also include elements of  
777 the STOP-Bang questionnaire (Ji and Kang, 2017; Naqappa et al., 2015), which assesses for other  
778 sleep-related conditions such as obstructive sleep apnea (OSA) and rapid-eye movement sleep  
779 behavior disorder (RBD). The form will be completed via telephone by trained study personnel.  
780 Participants with personal copies of their medical records may voluntarily provide such records to  
781 study personnel as a supplement to medical history review. Patients who screen positive for  
782 untreated OSA will be instructed to seek a definitive diagnosis from their clinical care providers.
  - 783 • *TBI Screener*: The TBI Screener Form is designed to elicit information regarding the participant  
784 TBI(s). The form utilizes the Ohio State University Traumatic Brain Injury Identification Method  
785 (OSU-TBI-ID) (Corrigan and Bogner, 2007) as its standardized procedure for obtaining the  
786 lifetime history of participant TBI. The screener will be administered by trained study personnel  
787 and will take approximately 15-20 minutes to complete.

### 788 **Primary Outcome Assessment**

789 *Timepoints*: (1) baseline; (2) weekly during the intervention period; (3) post-intervention, approximately 9  
790 weeks following consenting; (4) 3 month follow-up.

791 *Data Gathered*: The primary outcome assessment will be completed within the online portal and will be  
792 labeled by coded patient identifier and date of collection.

- 793 • *Insomnia Severity Index (ISI)*: The ISI is an extensively validated self-report questionnaire  
794 designed to assess the presence and severity of insomnia sleep disorder and is empirically-  
795 validated in general and military populations (Gagnon et al., 2013; Bastien et al., 2001; Jenkins et  
796 al., 2015; Morin et al., 2011). An ISI score of approximately 15 or greater has been demonstrated  
797 to be an appropriate cutoff for confirming the presence of mild clinical insomnia (Morin et al.,  
798 2011; Gagnon et al., 2013). The ISI takes approximately 3-5 minutes to complete.

### 800 **Secondary Outcome Assessments**

801 *Timepoints*: (1) baseline; (2) post-intervention, approximately 9 weeks following consenting; (3) 3 month  
802 follow-up.

803 *Data Gathered*: Self-report measures will be completed via within the online portal and be labeled by  
804 coded patient identifier and date of collection.

- 805 • *Functional Assessment of Chronic Illness Therapy – Fatigue (FACIT-F)*: The FACIT-F is a self-  
806 report questionnaire designed to assess symptoms of physical and emotional fatigue in a variety  
807 of different illnesses (Butt et al., 2013). The FACIT-F takes approximately 5-10 minutes to  
808 complete and will be administered via electronic survey within the online portal.
- 809 • *Pittsburgh Sleep Quality Index (PSQI) with Addendum for PTSD (PSQI-A)*: The PSQI-A is a  
810 modified version of the well-validated PSQI self-report questionnaire (Grandner et al., 2006) that  
811 includes additional sleep quality and insomnia symptoms specifically in participants with  
812 diagnosed or suspected PTSD such as nightmares (Germain et al., 2005). A PSQI score of 5 or  
813 greater has been demonstrated as a reasonable cut-off for confirming the presence of clinical  
814 insomnia (Grandner et al., 2006). The PSQI and PSQI-A take approximately 5-10 minutes to  
815 complete and will be administered via electronic survey within the online portal.
- 816 • *Patient Health Questionnaire 9 for Depression (PHQ-9)*: The PHQ-9 is a self-report assessment  
817 for signs and symptoms associated with major depression disorder (Kroenke et al., 2001). The  
818 PHQ-9 takes approximately 3-5 minutes to complete and will be administered via electronic  
819 survey within the online portal.
- 820 • *PTSD Checklist for DSM-5 (PCL-5)*: The PCL-5 is a self-report questionnaire designed to assess  
821 symptoms of PTSD (Belvins et al., 2015). The PCL-5 takes approximately 5-10 minutes to  
822 complete and will be administered via electronic survey within the online portal.

- 823
- 824 • *Migraine Disability Assessment (MIDAS)*: The MIDAS is a self-report questionnaire designed to  
825 assess migraine headache frequency, duration, severity, and life impact (Stewart et al., 2001). The  
826 MIDAS takes approximately 5-10 minutes to complete and will be administered via electronic  
827 survey within the online portal.
  - 828 • *Attitudes and Expectations Questionnaire*: The Attitudes and Expectations Form will collect  
829 qualitative information from participants as to their expected benefit from participating in this  
830 study (collected at baseline), believed group randomization assignment (collected post-  
831 intervention), and subjective perceived benefit from eCBT-I intervention (collected at 3 month  
832 follow-up). The form will also include general questions regarding participant satisfaction after  
833 having completed the study. This form takes approximately 5-10 minutes to complete.

### 834 ***Internal Blinding Efficacy Form***

835 *Timepoint*: Following completion of participant 3 month follow-up evaluation,  $\pm 10$  days, and preceding  
836 participant file database lock and offering of open-label intervention.

837 *Data Gathered*: Study investigators will complete with coded patient identifiers and dates of collection.

- 838 • *Internal Blinding Efficacy Form*: The Internal Blinding Efficacy Form will document the study  
839 team's believed participant group randomization assignment prior to participant file database  
840 lock. This form takes approximately 1 minute to complete.

### 841 ***Electronic Capture Outcome Forms***

842 All electronic capture outcome forms will be completed through the SHUTi portal via integrated Qualtrics  
843 questionnaires. This information shall be hosted and temporarily stored in a coded database format on  
844 remotely-located Amazon Web Services (AWS) servers. The UVA will be responsible for the initial setup  
845 of the electronic capture outcome forms database and ongoing maintenance will be managed by the study  
846 team. During the intervention period and for each participant, the study team will routinely pull data from  
847 the server and transcribe the data to secure electronic and paper records stored internally at the CNRM.  
848 Following a participant's completion of the intervention period, a final quality control check will be  
849 performed for all study records and outcomes before scrubbing the coded data from the AWS server.  
850 Further information regarding data flow and sharing processes is included in protocol section 10.14 and  
851 the appendix item 'Data Sharing Application Agreement Draft'.  
852  
853  
854

### 855 **If you are obtaining SSNs, provide a justification as to why and explain why a substitute cannot be 856 used**

857  
858 The study team must collect participant social security numbers (SSN) for the purpose of verifying  
859 DEERS eligibility and GUID issuance.  
860

### 861 **Managing Data (Data Management and/or Sharing Plan) for this Study:**

862  
863 Data Collection procedures are outlined in the section titled 'Data Collection'.  
864

865 Enrolled participants will be assigned a unique study ID consisting of the prefix, 'Insomnia-1-  
866 followed by a random three digit number. A Master List linking enrolled protected health information  
867 (PHI) to the study ID will be stored in a password-protected database within a secure DoD server. Hard  
868 copies of the list with randomization assignment will be stored in a locked cabinet and individually sealed  
869 participant envelopes, within a locked office at the CNRM headquarters. Access to the database and list  
870 will be provided to approved study personnel.  
871

872 Enrolled participants will also be assigned a GUID. The CNRM GUID is a number assigned by  
873 the CNRM Informatics Core. The Informatics Core has established an encrypted system and will provide

874 access to the site for generation of a GUID from PHI data. A Master List matching GUIDs to PHI will be  
875 maintained on a DoD server with access limited to designated study personnel. Electronic Master List  
876 records will be backed up electronically at least monthly. The mapping from PHI to GUID will not be  
877 stored by or known to the CNRM Informatics Core or NIH Center for Information Technology personnel,  
878 but the central registration of issued GUIDs will help ensure uniformity of identifiers across sites. CNRM  
879 Master Lists will contain the following information: GUID, last name, SSN, date of birth, and/or medical  
880 record number. Participants will retain initially-assigned study IDs and GUIDs throughout their  
881 participation. All data will be stored and linked to the study ID and/or GUID. The Master List will be kept  
882 in a secure location for a period of 5 years after study closeout and will then be securely destroyed.  
883

884 As part of the enrollment process, potential participants will undergo a telephone and electronic  
885 consenting process using a customized Google Forms online portal following 21 CFR Part 11 and  
886 HIPAA-compliant guidelines. The Google Forms consenting portal will be hosted under the secure USU  
887 Google domain. Electronic records of the online consents form database will be housed on a secure DoD  
888 server at USU. Back-up hardcopies for all informed consent forms will be stored in a securely locked  
889 room and cabinet at the CNRM Twinbrook administrative offices with access limited to approved study  
890 personnel.  
891

892 Data collected may be captured via telephone or in web-based format. Records acquired via  
893 telephone and transcribed by the study team to paper format will be stored in a locked cabinet, in a locked  
894 room, at CNRM with access of documents provided to approved study personnel. Records acquired via  
895 telephone and transcribed to PDF or electronic format will be stored in a secure DoD server, with access  
896 of documents provided to approved study personnel. Secure electronic data capture (EDC) will be  
897 completed by the study team via the CNRM Informatics Core System. Although collaborators at UVA  
898 will retain administrative access to the SHUTi portal for the purposes of development and testing, all  
899 Internet services will be hosted externally via Amazon Web Services (AWS) and Qualtrics. Deidentified  
900 and coded outcome measures collected via AWS and Qualtrics data servers will be transcribed by the  
901 CNRM study team onto the CNRM Informatics Core System which will serve as the master electronic  
902 study record. All data being stored in CNRM Informatics Core System will undergo quality control  
903 processing by the data manager before being entered. Data entered into the system is then transmitted via  
904 Secure Sockets Layer to a database protected by firewall. Although behavioral outcome assessments will  
905 be personal in nature, no identifiable information except a temporary session-based IP address will be  
906 captured by AWS and Qualtrics data servers. AWS and Qualtrics data servers will not retain participant  
907 IP addresses or identifiable information and will instead solely use coded study ID numbers as means of  
908 communication between each other and the study team. Parties at UVA, AWS, and Qualtrics will at no  
909 point have access to directly identifiable information. Names and electronic signatures of participants will  
910 be collected on Google Forms under the secure USU Google domain as part of the consenting process.  
911 After completion of consent and printing of hardcopy records, electronic records will be promptly deleted  
912 from the USU Google Forms domain. Access to all study data will be provided only to approved study  
913 personnel.  
914

915 Data transcribed to paper may be scanned as needed and saved on the DoD secure network for  
916 record keeping. Documents collected via web-based format or transcribed to electronic format may be  
917 printed and stored in a locked room and cabinet at CNRM.  
918

919 To protect participant confidentiality, documents will be labeled with the study ID, time point,  
920 and/or date of interaction (for more detailed information regarding labeling, see section 'Data Collection').  
921 Research records will be kept indefinitely.  
922



923 At the conclusion of the study, the CNRM Informatics Core will provide for the identifier-free  
924 research records to be transferred and stored in the Federal Interagency Traumatic Brain Injury Research  
925 (FITBIR) and the CNRM Data Repository, as appropriate.  
926

927 Confidentiality of records will be protected to the fullest extent possible. However, information  
928 regarding participants' health may be required to be reported to appropriate medical and/or command  
929 authorities per participant safety and legal requirements. The reporting of sensitive information (e.g.,  
930 suicidal ideation) by military personnel participating in the study will be reported to their Commanding  
931 Officer. In these instances, referral sources for assistance will also be provided.  
932

933 Participants will be informed that these results may be published for scientific purposes, provided  
934 their identity is not revealed. Members of CNRM, sponsor representatives, Uniformed Services  
935 University, Henry M. Jackson Foundation, US Department of Defense, and NIH may have access to the  
936 study data for auditing purposes. At no point during this investigation will Defense Health Agency  
937 (DHA) data be transferred outside of the DHA. Data agreements will be included as deemed necessary.  
938

### 939 **Managing Data for Future Research:**

940  
941 Data collected throughout the study may be used for future research. Identifier-free data will be  
942 shared with the following repositories: the CNRM Data Repository and the FITBIR Database.  
943 The CNRM Data Repository is a data repository that contains a collective of de-identified research data  
944 from CNRM funded studies. The FITBIR database is an informatics system and central data repository  
945 developed by DoD and NIH to store and link together phenotypic, diagnostic, treatment, and outcome  
946 data derived from persons who participated in TBI research studies. To protect privacy and  
947 confidentiality, data stored in these repositories will be linked to the participant's GUID. Data will stored  
948 in these repositories indefinitely. During the consent process, participants will be informed that their data  
949 may be used for future research. Participants will also be informed that this data may be used for a variety  
950 of research purposes that may not be able to be specified during consent time. Before a dataset is shared,  
951 identifiable information will be redacted and stored as a coded dataset until the time the Master List link  
952 is destroyed. The Master List link connecting GUIDs to identifiable information will remain with  
953 approved study personnel.  
954

955 The CNRM Informatics Core will provide for the identifier-free research records to be transferred  
956 and stored in the FITBIR and/or the CNRM data repositories, as appropriate. Identifiers will be removed  
957 and then transferred into the FITBIR and/or the CNRM data repositories database, as appropriate. All  
958 elements of PHI and personal identifying information (PII) will be removed prior to the sharing of data  
959 with the CNRM Data Repository and the FITBIR database. Access to the data located in the CNRM  
960 Repository will be determined by the CNRM Data Quality, Access, and Publication Committee.  
961 Investigators requesting access to the data located in the CNRM Data Repository are expected to provide  
962 the committee a list of investigators and collaborators who will have access to the data along with  
963 documentation of Ethical Conduct of Research and Human Participants Protection Training, as well as  
964 documentation of IRB approval of the research project.  
965

966 Data in FITBIR will be open for access through the FITBIR system to qualified researchers who  
967 have requested access to the data.  
968

969 As required by U.S. Law, this study will be registered with ClinicalTrials.gov prior to initiation of  
970 recruitment. On an ongoing basis and following project completion, updated results and study status will  
971 also be provided to the site.  
972

### 973 **STATISTICAL ANALYSIS PLAN**

974

975 **Primary Outcome**

976 Change in ISI score pre- versus post-intervention represents the primary outcome measure of  
 977 interest. Analyses will be based on intention-to-treat (ITT) as it pertains to participant's original group  
 978 assignment. First, an initial standard analysis will examine the ISI change between week 1 (pre-  
 979 intervention) and week 6-9 (post-intervention) between the active and control groups. Assuming ISI  
 980 measures are normally distributed, the following mixed model could be applied to assess changes in ISI  
 981 score post-intervention compared to pre-intervention in active and control groups:

982

$$E[Y_{ijk}] = \alpha_i + \beta_0 + \beta_{1j} \text{ Intervention} + \beta_{2k} \text{ Time} + \beta_{3jk} \text{ Intervention} \times \text{Time}$$

984

985 ... where  $Y_{ijk}$  represents ISI score in the  $i$ th person,  $j$ th group (1=active, 0=control) and  $k$ th timepoint  
 986 (1=6-9 weeks, 0=1 week). Based on the model,  $\beta_1$  represents the mean difference in ISI score between  
 987 groups at week 1,  $\beta_2$  represents the mean difference in ISI at 6-9 weeks vs. 1 week in the control group,  
 988 and  $\beta_3$  represents the mean difference in ISI score at 6-9 weeks vs. 1 week in the intervention relative to  
 989 the control group. A two-sided test with  $\alpha=0.05$  would test the significance of the intervention x time  
 990 effect represented by the  $\beta_3$  coefficient. Additional parameters in the model include  $\beta_0$  which represents  
 991 the mean ISI score in the control group at 1 week and  $\alpha_i$  which represents an individual's random effect  
 992 (i.e., ISI measure at week 1) to account for within-subject correlation.

993 Given subject-to-subject variability with respect to completion of the eCBT-I protocol within the  
 994 intervention window period ranging between 6 to 9 weeks, an additional analysis of group differences in  
 995 ISI scores will be examined using area under the curve (AUC). Based on AUC methods proposed by  
 996 Faraone et al. (2000), the AUC method applied to the current study would examine ISI differences (week  
 997 6-9 – week 1) - i.e., negative differences would indicate symptom improvement - between the active and  
 998 control groups. Specifically, differences in ISI score (D) for the entire study group would be ranked from  
 999 lowest (i.e. negative) to highest (positive differences). For each D, the cumulative percentage of  
 1000 respondents from the active and control groups would be determined, plotted with respect to y and x axes  
 1001 representing proportion of responders in these two groups, and an intervention-response curve would be  
 1002 drawn (See Figure 7 below courtesy of Faraone et al.). The AUC, measured with respect to this  
 1003 intervention – response curve, will be examined with respect to AUC=0.5 (i.e., null difference), as  
 1004 typically reported in ROC analyses, using a two-sided test and  $\alpha=0.05$ .

1005

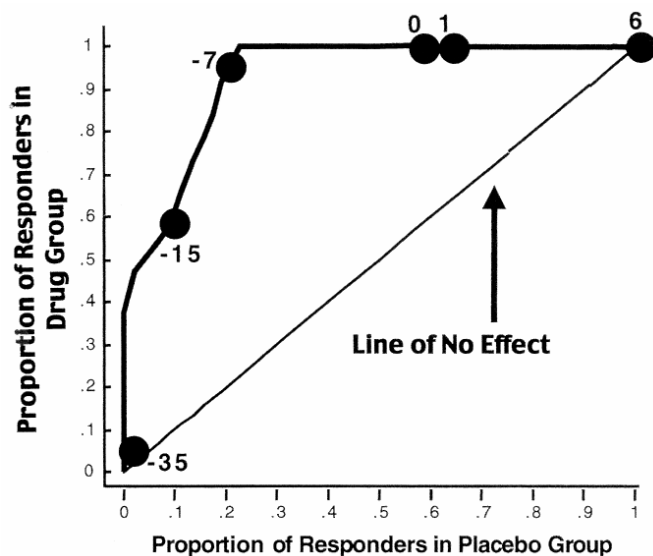

1006

1007 **Figure 7.** Example intervention response curve between proportion responders in active and control  
 1008 groups (Faraone et al., 2000). The protocol herein does not include a drug group.

1009

1010

A separate analysis will examine ISI differences between week 1 and 3 month follow-up following intervention. Similar to the analysis above that examined pre- versus post-intervention differences in ISI score, the following mixed model could be applied to assess changes in ISI score at 3 month follow-up compared to week 1 between the active and control groups:

1011

1012

1013

1014

$$E[Y_{ijk}] = \alpha_i + \beta_0 + \beta_{1j} \text{Intervention} + \beta_{2k} \text{Time} + \beta_{3jk} \text{Intervention} \times \text{Time}$$

1015

1016

1017

... where  $Y_{ijk}$  represents ISI score in the  $i$ th person,  $j$ th group (1=active, 0=control) and  $k$ th timepoint (1=3 months, 0=1 week). Based on the model,  $\beta_1$  represents the mean difference in ISI score between groups at week 1,  $\beta_2$  represents the mean difference in ISI at 3 months vs. 1 week in the control group, and  $\beta_3$  represents the mean difference in ISI score at 3 months vs. 1 week in the intervention relative to the control group. Similarly, a two-sided test with  $\alpha=0.05$  would test the significance of the intervention x time effect represented by the  $\beta_3$  coefficient, and additional parameters would be included as previously shown.

1018

1019

1020

1021

1022

1023

1024

1025

### **Secondary Outcomes**

1026

Change in measures considered to be associated with ISI that could potentially be affected by the CBT-I intervention will be examined using different models for the intervention group. Initially, these different secondary outcomes will be examined for normality. In the case that the measures are normally distributed, a mixed model similar to the one below would be applied to examine differences in the measure of interest pre- versus post-intervention assessment. For example, in the following model:

1027

1028

1029

1030

1031

$$E[Y_{ijk}] = \alpha_i + \beta_0 + \beta_{1j} \text{Post-intervention} + \beta_{ik} X_{ik}$$

1032

1033

1034

... where  $Y_{ijk}$  represents the secondary outcome measure of interest for the  $i$ th treated subject,  $j$ th assessment (1=post-intervention, 0=pre-intervention), with covariate distribution  $X_k$ , where  $X_k$  could represent age, sex, education in addition to other potential secondary outcome measures. Based on this model,  $\beta_1$  would represent the mean change in the measure of interest (e.g., PHQ-9) post-intervention vs. pre-intervention, accounting for differences in age, sex, education status, and other measures between participants. Similarly to the previous model, a random intercept would be included to account for within-subject correlation. Additional parameters (e.g., random slope) could be added to the model for each subject to examine between-subject variability not explained by other model parameters.

1035

1036

1037

1038

1039

1040

1041

In the case that the different secondary outcome measures are not normally distributed, non-parametric methods and/or modeling strategies (e.g. generalized linear models) will be applied, in the context of repeated measures, to evaluate the effects of interest.

1042

1043

1044

1045

1046

### **Interim Analyses**

1047

Interim analyses will be conducted with  $n=100$  and  $n=150$  participants, respectively, who completed the protocol. To maintain a type 1 error = 0.05 and power = 0.9, based on an analysis of the entire sample ( $n=200$ ), larger critical values were calculated for the first and second interim analyses required for rejecting the null hypothesis (i.e., no mean difference in ISI score between active and control groups). These larger critical values correspond with significance tests (p-values) of 0.004 and 0.0196 at the first and second analysis, respectively. The significance test required for the third (and final) analysis, based on the full sample, is slightly lower ( $p < 0.045$ ) as result of including the interim analyses. Stopping boundaries were based on methods developed for sequential design and provide critical values at different stages that would approximate  $\alpha=0.05$  given an analysis of the full sample (O'Brien and Fleming, 1979). Analyses that indicate significant difference in insomnia severity, depression, plus PTSD scores (scores for ISI, PHQ-9, and PCL-5, respectively) jointly, between pre- and post-intervention assessments, based on these reduced p-values, will result in early termination of the trial due to intervention efficacy. To

1048

1049

1050

1051

1052

1053

1054

1055

1056

1057

1058

1059 assess group differences with respect to the joint distribution of these measures, we will employ  
1060 multivariate analysis of variance (MANOVA). Changes in scores for the respective outcome measures  
1061 will be examined as dependent variables with respect to group assignment. An overall test, as well as  
1062 individual tests of difference, of the dependent measures will be assessed and a decision will be made to  
1063 terminate the study. Only the statistician will have access to the interim analysis results while the rest of  
1064 the investigators will remain blinded.

1065

### 1066 *Missing Data*

1067 It should be noted that in order to advance through the different eCBT-I training (online study  
1068 portal) modules, participants need to complete questions related to the primary and some secondary  
1069 outcome measures (i.e., ISI, fatigue, daytime sleepiness). Therefore, data will not be missing  
1070 intermittently during the trial period (i.e., 1 week - 9 week). However, participants may decide to drop out  
1071 of the study before completion of the entire protocol which could result in right censored or missing data  
1072 beyond the time point at which participant leaves the trial. Different analytical strategies will be applied.  
1073 If the data are missing at random between the active and control groups, linear mixed-effects models will  
1074 be utilized which essentially impute the missing values with mean data of participants who completed the  
1075 protocol (Peters et al., 2012; Bell et al., 2013). If data are not missing at random, such as informative  
1076 censoring, the distribution of missing data will be examined with respect to available prognostic  
1077 indicators in control and active groups at baseline and over follow-up. Analytical strategies such as  
1078 inverse-probability-of-censoring weighted methods will be utilized which “upweight” data of s  
1079 participants who have completed the protocol who share characteristics of those who dropped out of the  
1080 study as a way to adjust estimates for dropout (Robins et al., 2000). Other analytical tools will be used  
1081 and results will be compared to determine and correct for potential bias in effect estimates (Bell et al.,  
1082 2013; Pericleous, 2016).

1083

### 1084 *Exploratory analyses*

1085 In addition to examination of primary and secondary outcome measures with respect to  
1086 intervention, analyses will be conducted utilizing data based on secondary measures (i.e., sleep diaries,  
1087 etc.) and examined with respect to the primary (i.e. ISI) and secondary outcome measures (i.e., PCL-5,  
1088 PHQ-9). These secondary measures represent compliance measures (i.e., measure of participant  
1089 willingness to record and track sleep patterns based on protocol instructions consistent with good sleep  
1090 practices). Analyses will examine compliance (i.e., missing secondary measures versus non-missing  
1091 secondary measures) with respect to outcome measures and statistical tests will be performed (i.e., two-  
1092 tailed t-test). We hypothesize that participants who record daily sleep diaries throughout the intervention  
1093 period will have more significant benefits in terms of ISI change than participants who record sleep  
1094 diaries intermittently.

1095

### 1096 *Power Analyses*

1097 Different power analyses were applied to evaluate whether potential effects of interest would be  
1098 significantly based on the different analyses above. Previous reports that have examined ISI with respect  
1099 to eCBT-I intervention and have found significant effects (Ritterband et al., 2009; Ritterband et al., 2017).  
1100 Given reported distributions from these reports, data were simulated and power to detect given effects  
1101 was evaluated based on different conditions including: (1) sample size (pre-specified for N=200, but  
1102 investigated for lower N); (2) arm imbalance (3:1 vs 1:1); (3) variability of the outcome measures under  
1103 evaluation; (4) study attrition; and (5) adjustment for covariates with respect to analyses of secondary  
1104 outcomes.

1105

1106 Power curves were generated in the case of the first analysis described above to examine AUC  
1107 based on hypothetical intervention-response curves. AUC was varied relative to AUC = 0.5 (i.e., no  
1108 intervention effect). Differences in sample size were compared in the different curves to reflect potential  
1109 dropout rates of 0%, 20% and 40% in the study (Figure 8).

1109

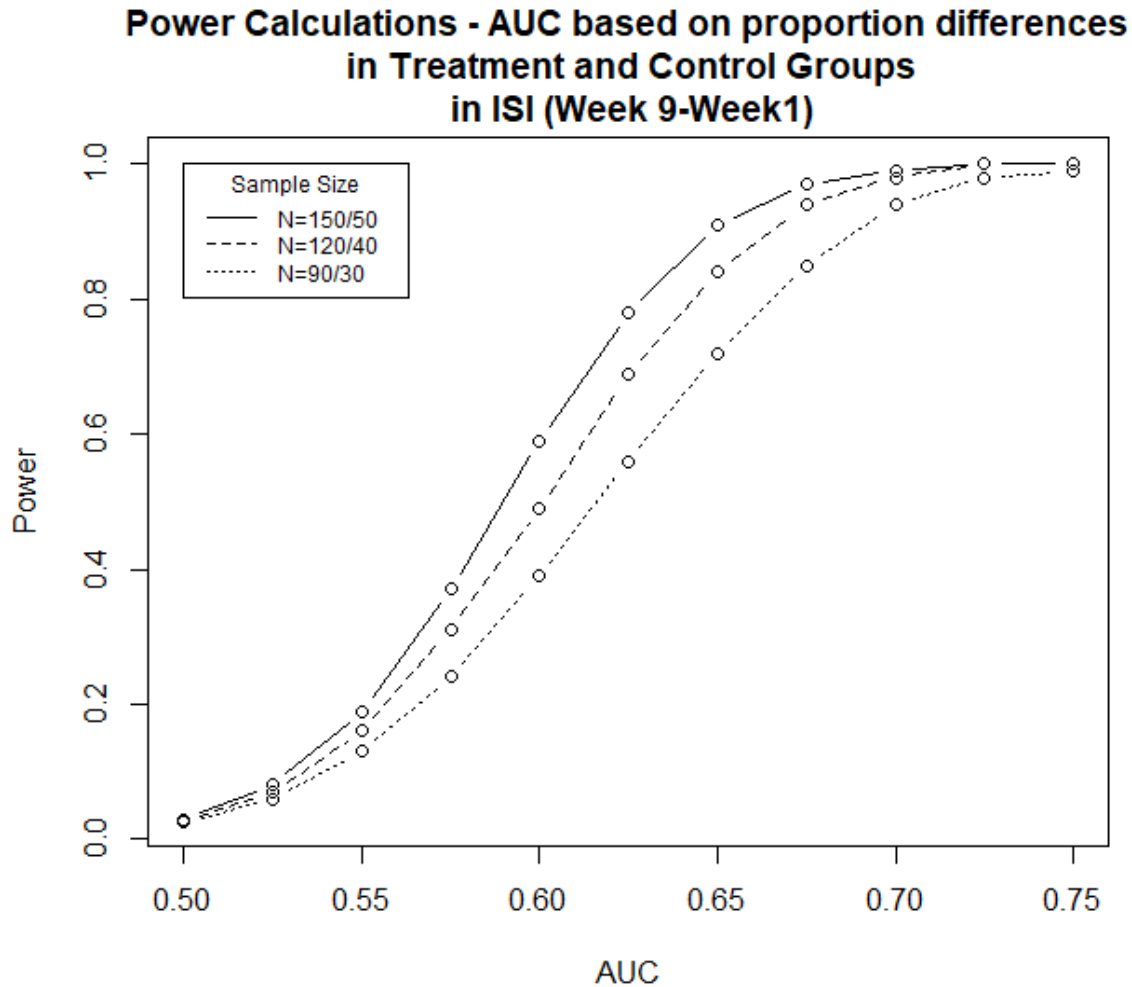

1110 **Figure 8.** Calculated power of AUC analysis as affected by varying estimated sample size and participant  
 1111 attrition rates.  
 1112  
 1113

1114 In addition to the power curves generated for AUC, power estimates were generated based on a  
 1115 complementary set of analyses to investigate the effect of intervention on difference in ISI score (9 week  
 1116 – 1 week), using instead a repeated-measures analysis of variance (ANOVA) to model the effects of  
 1117 interest – i.e.,  $Y \sim \text{Intervention} + \text{Time} + \text{Intervention} \times \text{Time}$ . Power was evaluated with respect to the  
 1118 Intervention x Time effect from this model – i.e., the parameter that would indicate an effect of  
 1119 intervention on ISI score differences (9 week-1 week), based on a two-sided test and  $\alpha=0.05$ . In this  
 1120 analysis, different conditions were modified to evaluate their respective effects on power. Differences in  
 1121 group means in ISI score were simulated to be close to zero at week 1, while effect size reflects  
 1122 differences in these group means at week 9 (note: Ritterband et al. (2017) reported mean differences of ~  
 1123 0 (SD = 5.5) and 5 (SD=5.5) at pre/post-assessment).  
 1124

| Arm Balance | Mean Difference | Stddev | Total N | Power |
|-------------|-----------------|--------|---------|-------|
| 3:1         | 5               | 5.5    | 200     | 1     |
| 3:1         | 5               | 5.5    | 160     | 1     |
| 3:1         | 5               | 5.5    | 120     | 1     |
| 3:1         | 5               | 8.5    | 200     | 0.99  |
| 3:1         | 5               | 8.5    | 160     | 0.96  |

|     |   |     |     |      |
|-----|---|-----|-----|------|
| 3:1 | 5 | 8.5 | 120 | 0.90 |
| 3:1 | 3 | 5.5 | 200 | 0.95 |
| 3:1 | 3 | 5.5 | 160 | 0.89 |
| 3:1 | 3 | 5.5 | 120 | 0.79 |
| 3:1 | 3 | 8.5 | 200 | 0.64 |
| 3:1 | 3 | 8.5 | 160 | 0.54 |
| 3:1 | 3 | 8.5 | 120 | 0.43 |
| 1:1 | 5 | 8.5 | 200 | 0.99 |
| 1:1 | 5 | 8.5 | 160 | 0.99 |
| 1:1 | 5 | 8.5 | 120 | 0.96 |

1125 **Table 1.** Power estimates of intervention effects pre- and post-intervention (1 week-9 weeks) under  
 1126 different conditions.

1127

1128 This calculation assumes correlation structure among residuals of repeated-measures ANOVA.

1129  $\rho_{ij} = \rho^c$  where  $\rho=0.7$  and  $c=|j-i|^0=0.8$  (i.e.,  $\rho$  represents correlation between adjacent weeks (week 1  
 1130 versus week 2) and  $c$  represents the decay in correlation at additional subsequent weeks (week 1 versus  
 1131 week 3, ..., week 9).

1132 Based on Table 1 and assuming results of the current study are comparable to previous  
 1133 intervention studies involving CBT-I and ISI, differences in protocol in the current study with respect to  
 1134 arm balance and N should have negligible effects for evaluation of intervention effects with respect to ISI  
 1135 score between 1 week and 9 weeks.

1136 Power curves were also generated to examine differences in intervention effects with respect to  
 1137 changes in ISI between 1 week and 3 months. The plots below depict different power estimates based on  
 1138 the effect size of the Intervention x Time interaction in the models described previously. Differences in  
 1139 power were examined assuming differences in the standard deviation of the ISI measure at the 3 month  
 1140 assessment and assuming a dropout rate of 20% and 40% at that time point (Figures 9-10).

1141

### Power Calculations - Pre/Post-Assessment (6 months) assuming 20% attrition

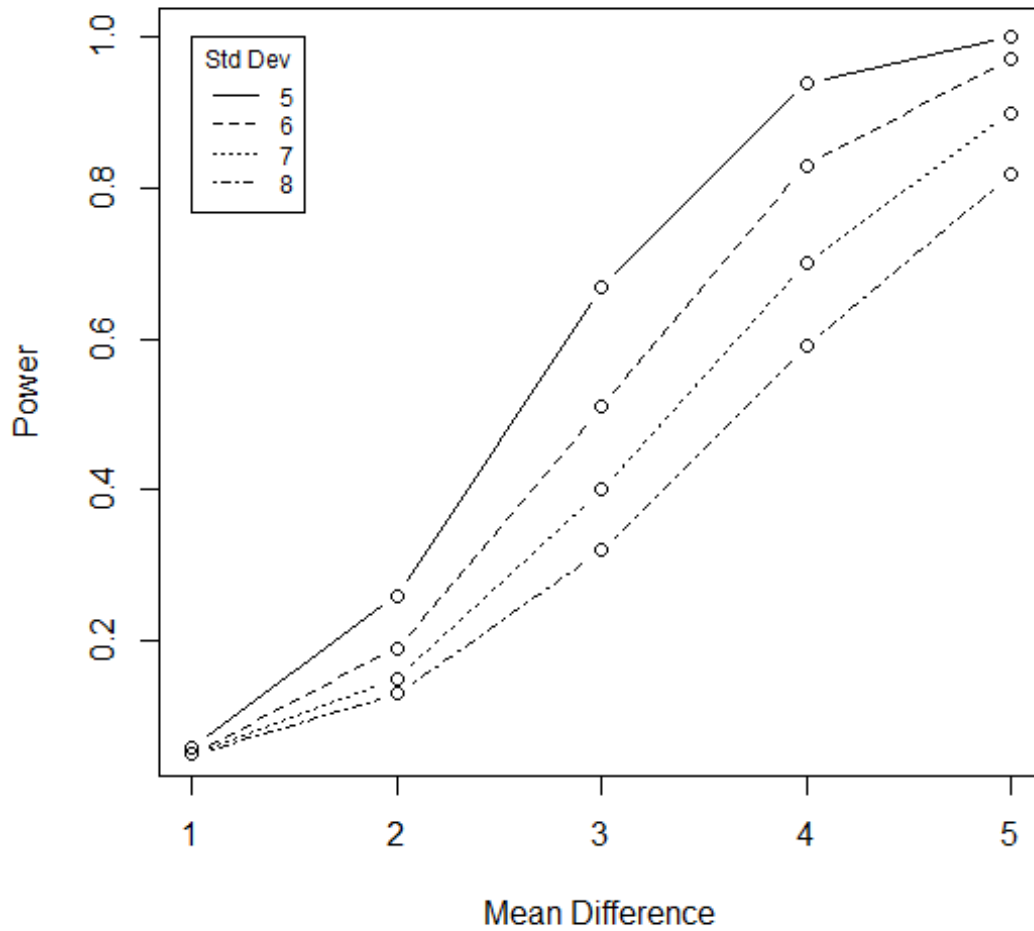

1142  
1143 **Figure 9.** Calculated power of mean difference analysis between pre- versus post-intervention  
1144 assessments assuming 20% attrition rate.  
1145  
1146

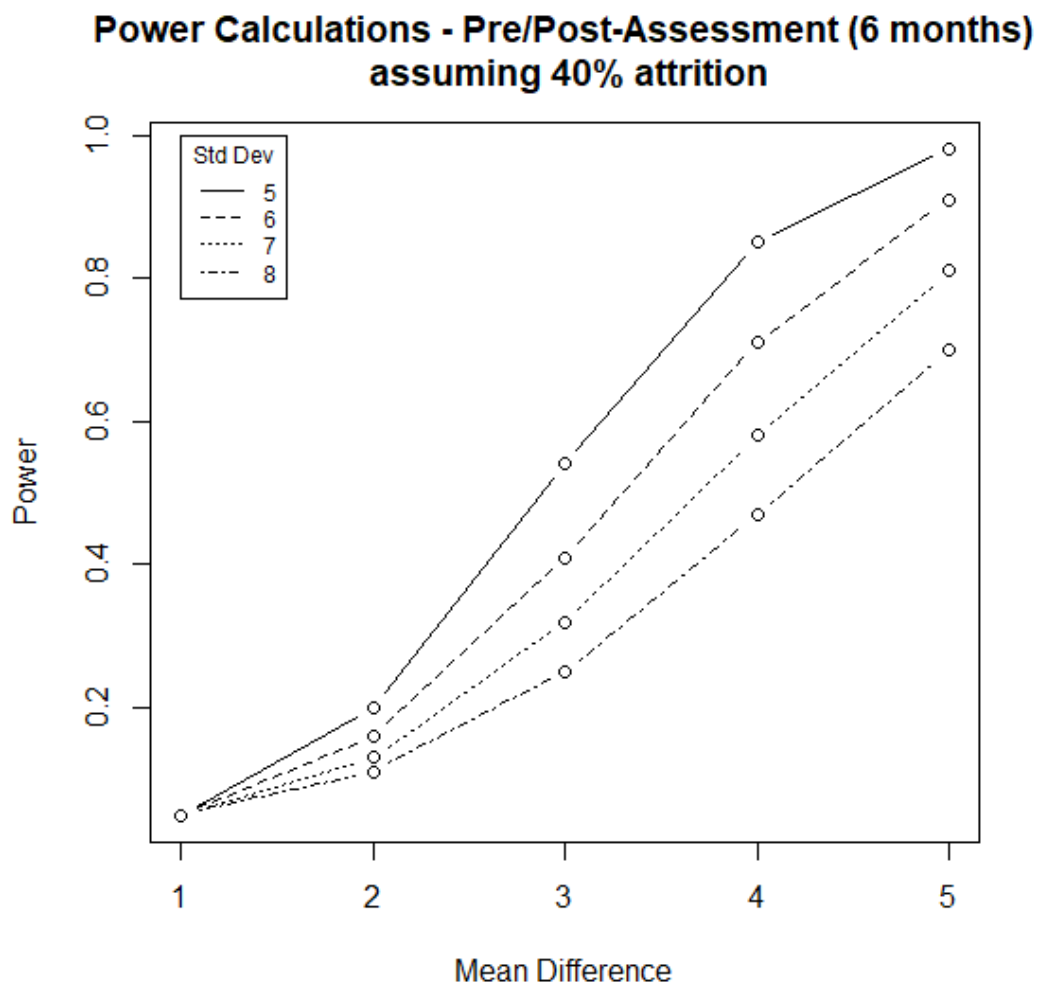

1147  
1148 **Figure 10.** Calculated power of mean difference analysis between pre- versus post-intervention  
1149 assessments assuming 40% attrition rate.

1150  
1151 Ritterband et al. (2017) reported significant mean differences between active and control groups  
1152 of ~ 4 at the 3 month follow-up assessment, a standard deviation of 5.6 in ISI score (at month 6) in each  
1153 group (N =114 eCBT-I and 129 control), respectively. Based on Figures 9 and 10 above, there would be  
1154 sufficient power to detect similar effects based on a smaller sample assuming 20% attrition (i.e., group N  
1155 = 120 and 40) and 40% attrition (i.e., group N=90 and 30) at 3 month follow-up. Based on this and  
1156 previous study data, the study investigators predict smaller rates of attrition associated with a 3 month  
1157 follow-up as part of this investigation.

1158 Lastly, power curves were generated also to examine detection of secondary outcome measures,  
1159 specifically changes in these measures, in the treated group that would hypothetically follow from eCBT-I  
1160 intervention for insomnia. For the secondary measures, we utilized surrogate measures based on the  
1161 Posttraumatic Stress Disorder Checklist Military Version (PCL-M) and Beck Depression Inventory II  
1162 (BDI-II), which have been examined with insomnia in previous reports. Briefly, these reports examined  
1163 prevalence of ISI and its correlation with measures of PTSD and depression in both pre-deployed service  
1164 members (Taylor et al., 2016) and deployed service members who had sustained repeated TBI (Bryan,  
1165 2013). This literature has reported differences in PTSD and depression in those with clinical insomnia  
1166 (defined by the authors as ISI > 15) versus those with no insomnia (ISI < 15) (Bryan, 2013; Taylor,  
1167 2016). Although these represent surrogate measures for the variables planned for the study (i.e., PCL-5



1168 and PHQ-9), differences with respect to the power analysis should be negligible and the results should  
1169 provide a reasonable representation of those based on the actual study measures.

1170 Based on the marginal and joint distributions (i.e., correlations) of the measures from these  
1171 studies, multivariate normal data for ISI, PTSD, and depression were simulated pre- and post-assessment  
1172 (e.g. week 1 – week 9) in 150 participants (i.e., number of participants in the treated group for whom  
1173 changes in secondary measures would be examined). Changes in ISI score in treated participants were  
1174 generated based on previous reports (e.g. week 1 – week 9) (Ritterband et al., 2017). Correlations  
1175 between ISI, PTSD and depression from the literature were assumed to remain constant both pre- and  
1176 post-assessment. Power to detect mean differences in PTSD > 12 (PCL-M scale) or depression > 7 (BDI-  
1177 II scale), for each measure separately, that correspond with reduction in insomnia severity, using a paired  
1178 two-sided t-test with  $\alpha=0.05$ , is large (e.g. power > 0.99).

1179 Power curves were generated also to examine detection of change in PTSD where depression was  
1180 included as a covariate (for example, as a covariate in a linear model as shown previously) (Figure 11),  
1181 and change in depression where PTSD was included as a covariate (Figure 12). Power estimates are based  
1182 on a paired two-sided t-test with  $\alpha=0.05$ , where effects relate to the extent PTSD and depression are  
1183 correlated (i.e., a smaller mean difference effect size indicates stronger correlation between the measures).  
1184

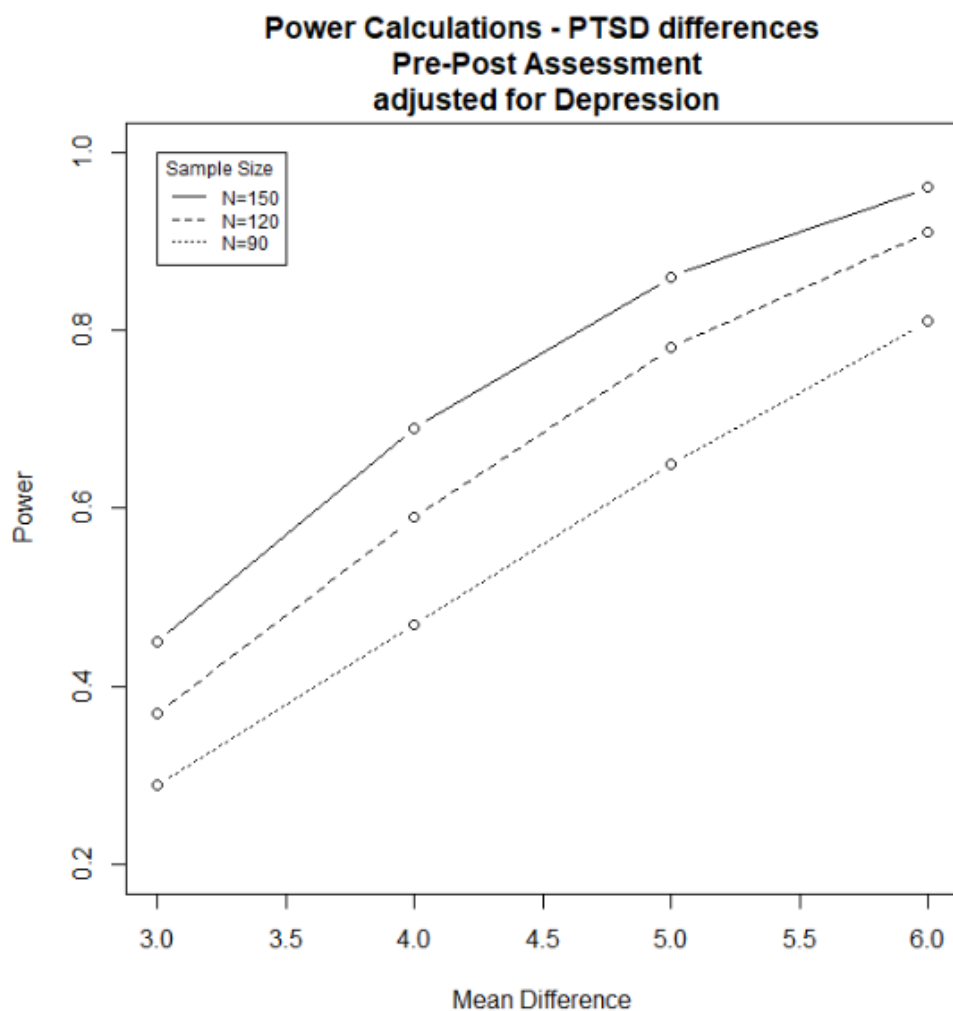

1185 **Figure 11.** Power curve for detection of change in PTSD with depression as a covariate.  
1186  
1187

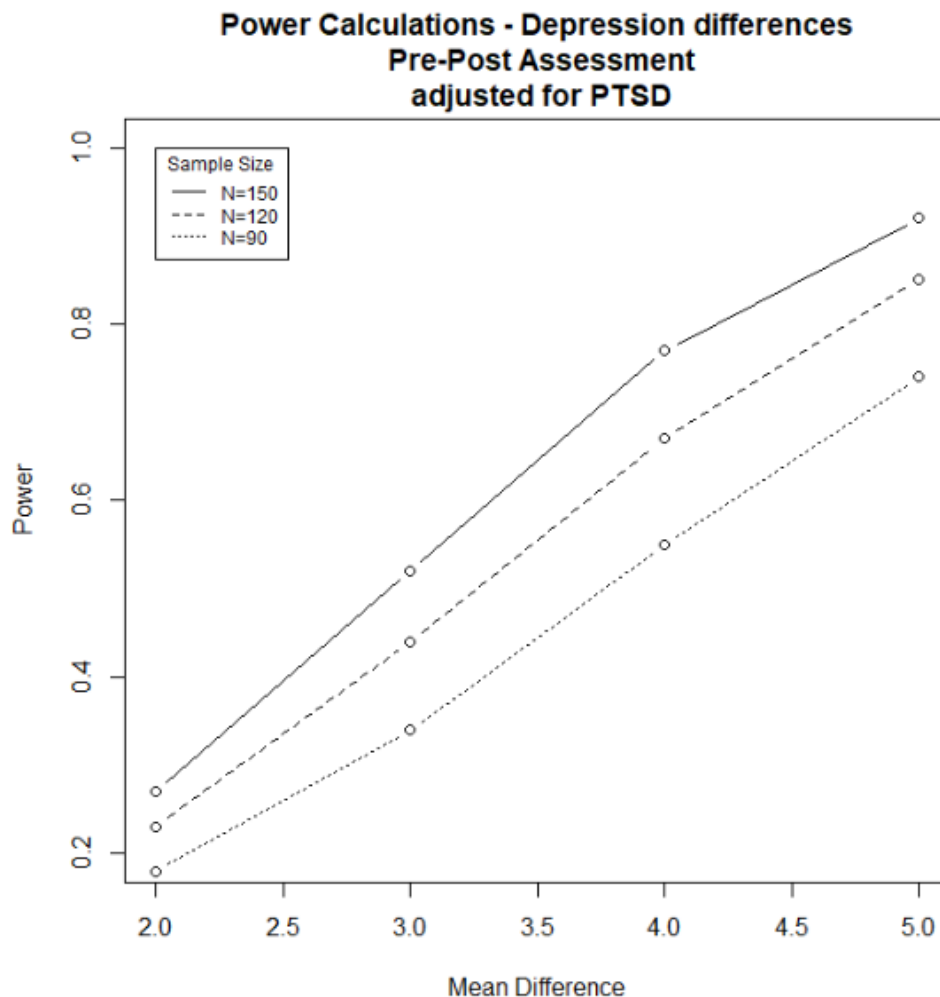

1188  
1189 **Figure 12.** Power curve for detection of change in depression with PTSD as a covariate.

1190  
1191 Power analyses were conducted using SAS version 9.4 and R version 3.4.4.

### 1192 1193 *Ongoing Safety Analysis*

1194 This clinical trial is designed to be minimal risk. ECBT-I has been documented as a highly safe  
1195 and efficacious intervention for insomnia in a general population. This investigation provides a means for  
1196 helping active and retired service members that may otherwise not seek assistance due to lack of access to  
1197 qualified practitioners, unwillingness to physically travel to healthcare facilities, or perceived  
1198 stigmatization associated with receiving a psychologically-focused therapy. However, if AEs or SAEs are  
1199 reported by participants during interactions with the study team, they will be immediately referred for  
1200 appropriate intervention at their nearest Military Treatment Facility (MTF) and the findings reported to  
1201 the IRB. The study team will inquire as to the presence of AEs and/or SAEs during the already scheduled  
1202 interactions with study participants. Furthermore, if during the course of the study a statistically  
1203 significant number of AEs or SAEs are reported, the study team will perform a partial early database lock  
1204 and execute an unblinded safety analysis or halt study activities entirely until an appropriate corrective  
1205 action plan can be implemented.

### 1206 1207 **PARTICIPANT INFORMATION**

1208 **Subject Population:**

1209 Male and female active or retired service members between the ages 18 and 64 with insomnia and  
1210 history of TBI.

1211

**1212 Inclusion Criteria:**

- 1213 1. Age 18-64
- 1214 2. Active or retired service members with DEERS eligibility
- 1215 3. Ability to provide verbal and electronic informed consent and follow study-related instructions
- 1216 4. Presence of clinical insomnia for a period of at least 1 month prior to consent as confirmed by
- 1217 self-reported ISI (score  $\geq 15$ ) and PSQI (score  $\geq 5$ )
- 1218 5. History of TBI  $\geq 6$  months prior to consent, including blast-related, as confirmed by a
- 1219 telephone-administered TBI Screener
- 1220 6. Reliable access to a telephone and the Internet via their computer or smartphone
- 1221 7. Stable regimen of medications for sleep or potentially affecting sleep over prior 1 month as
- 1222 confirmed by clinical history review.
- 1223

**1224 Exclusion Criteria:**

- 1225 1. Current or previous CBT-I or eCBT-I intervention; participants may still receive other approved
- 1226 therapies provided standard of care
- 1227 2. Life expectancy of less than 6 months
- 1228 3. Rapidly progressive illnesses such as late stage cancer, neurodegenerative conditions, major
- 1229 organ failure, etc.
- 1230 4. History of moderate to severe substance use disorders with the exception of nicotine
- 1231 5. Active bipolar disorder or psychosis that could be worsened by mild sleep restriction as part of
- 1232 eCBT-I.
- 1233 6. Routine irregular work schedules or sleep patterns defined as shift work greater than 1 day per
- 1234 week
- 1235 7. Discontinuation of DEERS eligibility resulting in immediate subject withdrawal.
- 1236
- 1237

**1238 RECRUITMENT AND CONSENT****1239 Identification and Selection of Participants:**

1240 Potential participants will be referred to the study team through multiple channels so as to  
1241 maximize potential therapeutic benefit for the highest number of interested persons. At no point during  
1242 the study will potential participant names or contact information be directly transmitted to non-approved  
1243 recipients or third-parties. Recruitment materials will be uniform across all channels and locations. All  
1244 recruitment materials will be IRB-approved by USU and institutionally approved by local oversight  
1245 committees as necessary. Interested persons will initiate contact the with study team using information  
1246 provided via one of the following advertisement channels:

1247

**1248 CNRM Recruitment Core**

1249 The study will utilize the CNRM Recruitment Core to assist in the recruitment of research  
1250 participants. The core coordinates an open-referral recruitment protocol for all persons interested in  
1251 learning more about clinical research opportunities in TBI. Participants are pointed to a web-based  
1252 consent and questionnaire describing the overall scope of CNRM research efforts and provide contact  
1253 information requesting further information. Persons are screened based on self-report for basic health  
1254 information and exclusion criteria (i.e., age, presence of traumatic brain injury, affiliation with the MHS).  
1255 Screening information is then channeled to study investigators matching them with eligible referrals for  
1256 specific clinical investigations.

1257

**1258 DVVIC**

1259 Providers in the Defense and Veterans Brain Injury Center (DVBIC) TBI Recovery Support  
1260 Program will make available contact details, flyers, cards, and posters providing basic information should  
1261 patients express interest in learning more about the study. Regional Education Coordinators may also be  
1262 offered recruitment materials for distribution at events.

1263

**1264 MTFs**

1265 Providers at MTFs will make available contact details, flyers, cards, and posters providing basic  
1266 information should patients express interest in learning more about the study. Regional Education  
1267 Coordinators may also be offered recruitment materials for distribution at events. These MTFs may  
1268 include Walter Reed National Military Medical Center, Camp Pendleton, Fort Bragg, Joint Base San  
1269 Antonio, Camp Lejeune, Fort Campbell, Fort Carson, Fort Hood, Fort Bliss, and Fort Belvoir.

1270

**1271 Media**

1272 Study personnel will publicize the study through various forms of media including but not limited  
1273 to: MTF bulletin boards, social media, or other Internet-based advertisements. Prior to initiating  
1274 recruitment with such media outlets, approval from the respective outlets will be established. Study  
1275 personnel may contact coordinators of relevant organizations (e.g., Wounded Warrior Project, BrainLine)  
1276 and also ask for a post on their social media sites (e.g., Facebook, Twitter). The study will also use  
1277 institution intramural and extramural websites, including ClinicalTrials.gov, and DoD/VA/USUHS  
1278 centers.

1279

**1280 Recruitment Process:**

1281 Once a potential participant has contacted the research team, they will be contacted by a study  
1282 investigator to gauge their interest in research. Interested participants will be sent an initial message (via  
1283 email or telephone/voicemail) to acknowledge receipt of their contact information. After the initial  
1284 message, three subsequent contact attempts will be made by the study investigators to schedule and  
1285 consent potential participants. Once contact is initiated, they will be invited to participate and will be  
1286 provided with the standard consent procedures including the background of the study, study procedures,  
1287 alternatives to participation, and potential risks and benefits. Potential participants will then be screened  
1288 by study investigators according to the inclusion-exclusion criteria and a two-factor verification of  
1289 identity.

1290

**1291 Compensation for Participation:**

1292 Monetary compensation is not being offered as a part of this study.

1293

**1294 Eligibility Assessment Process:**

1295 Screening for eligibility based on inclusion-exclusion criteria will be performed over the phone  
1296 and through AHLTA with all potential participants after consent has been provided. Screening procedures  
1297 can happen during multiple sessions via telephone so as to accommodate participant availability. Study  
1298 investigators will provide a detailed explanation of the study along with the informed consent and HIPAA  
1299 form for review prior to verbal and electronic consenting. Participants will be provided with an  
1300 opportunity to ask any questions they may have regarding the study before providing consent. We plan to  
1301 enroll up to 200 participants in the study to ensure estimations of statistical power and attrition are  
1302 adequately met.

1303

1304 A phone consultation for eligibility assessment will be scheduled with the participant after obtaining  
1305 informed consent. During the telephone discussion, the study team will collect medical history relevant to  
1306 the study inclusion-exclusion criteria. The study team will also perform a two-factor verification of  
1307 identity and DEERS eligibility using AHLTA and a provided SSN. In order to do this, the study team will  
1308 first locate the participant's electronic medical record within MHS. Once DEERS eligibility is confirmed  
1309 as indicated by the electronic system, investigators will verify identity by requesting the patient verbally

1310 confirms one or more specific elements of their electronic medical record. For example, the study  
1311 investigator may request the participant provides the name of their designated case manager, most recent  
1312 visit date to their local MTF, or similar question, and confirm that the provided answer accurately  
1313 corresponds with official record.

1314  
1315 Persons who do not meet eligibility criteria or fail two-factor identification will be excluded from  
1316 participation and documented as screening failures. Persons who are ineligible for participation will be  
1317 educated on alternative therapeutic options and/or provided contact information for a sleep specialist  
1318 clinic local to them.

1319  
1320 **Consent Process:**

1321 Are you requesting a waiver or alteration of informed consent?

1322  Yes  No

1323  
1324 *Please explain why you qualify for a waiver or alteration of informed consent:*

1325 N/A

1326  
1327 *Please explain the consent process:*

1328 Potential participants will be provided with an IRB-approved electronic informed consent,  
1329 institutionally approved by the Department of Research Programs, USU, during their initial telephone  
1330 consultation prior to the start of research activities. Persons expressing interest in participating will  
1331 complete the informed consent process via a telephone and web-based process described below. For each  
1332 participant, every effort will be made to ensure breadth of subject understanding of study expectations,  
1333 voluntariness to participate, alternative intervention options, and adherence to safety precautions. The  
1334 study team will also explain to potential participants that their involvement is strictly for research  
1335 purposes only, will not become part of or influence their electronic health record within MHS, and will  
1336 have no repercussions regarding the standard care they receive elsewhere or their military duty status. The  
1337 work for this study is purely exploratory in scope and has no legal influence on decisions such as  
1338 disability assessment or health care benefits.

1339  
1340 Potential participants may only complete the consenting process via the established telephone and  
1341 web-based procedure. After the study team is contacted by the potential participant informing them of  
1342 their initial interest, they will then undergo a consultation via telephone provided by the study team.  
1343 During the telephone consultation, the study investigator will provide the patient with information  
1344 directing them to the study-designated online consent portal. Once the participant verifies the document is  
1345 open, the study investigator will review study procedures, voluntariness and alternatives to participation,  
1346 the consent form, and HIPAA authorization. The study team will provide sufficient time to answer any  
1347 questions before consenting. There will be no specific time limit between participant contact and  
1348 informed consent; potential participants can ask questions and consider participating as long as they want  
1349 while the study is open to enrollment.

1350  
1351 Once the potential participant verbally agrees to be part of the study, they will be asked to digitally check  
1352 a box in the consent portal while providing their name with date and time, verifying willingness to  
1353 participate in the research study. As part of the consenting process, the participant will be required to  
1354 provide simultaneous telephone and digital confirmation of consent noted by their name, date, and time.

1355  
1356 **Withdrawal from Study Participation:**

1357 Participants have the right to withdraw from participation in the study at any point without the  
1358 need to provide a reason for withdrawal. Study investigators may also withdraw participants from the  
1359 study for medical, administrative, or non-compliance concerns. Participants wishing to be withdrawn

1360 from the study must do so with a written request to the PI. Coded data collected up until the point of  
1361 withdrawal may be used in data analysis.

1362

## 1363 **RISKS AND BENEFITS**

### 1364 **Risks of Harm:**

1365

#### 1366 *General*

1367 There are risks, discomforts, and inconveniences associated with any research study. For  
1368 participants randomized to the education control group, there is the possibility that their insomnia  
1369 symptoms may worsen during the period of non-active participation. Participants will be advised to  
1370 continue their current standard of care throughout participation in the study including use of medications  
1371 as prescribed by their primary physician. Participants in the education control group will be offered free  
1372 open-label intervention following their final 3 month follow-up evaluation so as to provide the potential  
1373 of therapeutic benefit for all persons regardless of group randomization assignment.

1374

#### 1375 *Outcome Assessments*

1376 Some of the questions asked during outcome assessments are sensitive in nature. Answering these  
1377 assessments may cause participants psychological distress. Participants will be advised they are free to  
1378 stop the outcome assessments and study participation at any time. Participants that present a risk of harm  
1379 to themselves or others will initiate immediate activation of the Emergency Action Plan. For more  
1380 information on the Emergency Action Plan, see section titled ‘Measures to Minimize Risks of Harm  
1381 (Precautions, Safeguards)’.

1382

#### 1383 *Research Records*

1384 All private study information, PHI, and PII, will be kept in a locked file cabinet behind locked  
1385 door or on an appropriately secured data server with access limited to approved study team members in  
1386 order to minimize risk. Participants will be given a coded study ID that will be used on all data forms  
1387 following successful enrollment, including information being transmitted electronically through AWS and  
1388 Qualtrics (as administered the investigators and collaborators at UVA). For additional information on the  
1389 safeguarding of protected information, see sections titled ‘Data Management’ and ‘Managing Data (Data  
1390 Management and/or Sharing Plan) for this Study’.

1391

#### 1392 *ECBT-I/CBT-I*

1393 As Internet-guided delivery of CBT-I is designed to be mimetic of traditional in-person therapy in  
1394 terms of technique and efficacy, so too are the potential for risks and benefits identical with the exception  
1395 of potential electronic information breach generally associated with use of the Internet or similar  
1396 telemedicine-based technologies.

1397 Sleep restriction, which imposes a strictly controlled sleep duration and sleep-wake schedule  
1398 during intervention, is hypothesized to be the most influential determinant in intervention success (Morin  
1399 et al., 2006; Spielman et al., 1987). The effects of mild sleep deprivation for participants may therefore  
1400 include feeling tired, fatigued, or anxious for a period of several weeks.

1401

### 1402 **Measures to Minimize Risks of Harm (Precautions, Safeguards):**

1403

#### 1404 *Emergency Action Plan*

1405 If a study team member has indication suggesting a participant may be in danger, either to  
1406 themselves or others, a triage-based emergency action plan consisting of (1) urgent response, (2) direct  
1407 referral, and (3) outside referral, will be initiated to ensure comprehensive and rapid follow up.

1408 Prioritization of action will be based on level of risk perceived by the study team.

1409 All situations requiring initiation of the emergency action plan will reported to IRB and the  
1410 CNRM within 48 hours. As appropriate and at the recommendation IRB, the participant will be directed

1411 to local resources. If judged necessary by IRB in order to protect the welfare of the participant or another  
1412 person, confidentiality may be breached as part of the referral process. The participant may also be  
1413 advised or removed from participation in the study if there is evidence of safety concern to the participant  
1414 or others. The study team is not obligated to report results to military or civilian authorities unless there is  
1415 evidence of imminent danger to the participant or others.

1416

1417 *(1) Urgent Response*

1418

In event of immediate threat of or confirmed harm to themselves or others, the study team will  
1419 contact 911 or the appropriate local emergency response authority. As part of the enrollment and medical  
1420 history review process, emergency contact info, physical address, and name of primary care provider are  
1421 collected by the study team. This information may be provided to emergency responders to coordinate an  
1422 immediate response on the participant's behalf. Urgent response actions may be initiated in the event of  
1423 threat of suicide, imminent violence, or similarly dire circumstances necessitating immediate intervention.

1424

1425

1426 *(2) Direct Referral*

1427

In scenarios with perceived but less-than-urgent risk, the PI and study team may direct participants to  
1428 local resources where appropriate. This may include referral to their local MTF, VA, or non-military  
1429 relevant care provider. Direct referrals may be initiated on if significant cause for concern is indicated.  
1430 The PI and study team will perform necessary correspondence with the participant and outside referral or  
1431 provider(s) so as to ensure appropriate follow-through. Potential participants failing to meet inclusion-  
1432 exclusion criteria may also be subject to this guidance in the event that cause for concern is discovered as  
1433 part of their screening procedures.

1434

1435 *(3) Outside Referral*

1436

If a participant declines direct referral or other support attempts offered by the study team, they will  
1437 be referred to an external public hotline service capable of providing 24/7/365 emergency consultation.  
1438 The Veterans Crisis Line ([www.veteranscrisisline.net](http://www.veteranscrisisline.net)), formerly known as the National Suicide  
1439 Prevention Lifeline, is a well-established public suicide prevention organization founded in 2007 that is  
1440 funded and operated by the VA and US Department of Health and Human Services (DHHS). Since its  
1441 inception, the Veterans Crisis Line has answered more than 3.3 million calls and initiated more than  
1442 93,000 emergency dispatches (US Department of Health and Human Services, 2018). The organization  
1443 also offers support services via online chat and text messaging. All services are confidential and  
1444 voluntary.

1445

1446 ***Safety Monitoring Plan***

1447

Monitoring is a major component of research support to ensure research participant safety, verify  
1448 accurate data collection, identify problem areas, and take corrective action to resolve problem areas when  
1449 necessary. The monitoring process includes verifying all enrolled participants have undergone necessary  
1450 protocol eligibility and regulatory compliance according to the International Conference on  
1451 Harmonization, Good Clinical Practice, DoD, NIH, DHHS, and FDA guidelines as applicable.  
1452 Descriptions of preparation, performance, and follow-up for monitoring visits are also described below.

1453

The study team, in conjunction regulatory monitoring representatives at the CNRM, will exercise  
1454 routine vigilance through examination of the assessments, measures, and other electronic records. The  
1455 independent regulatory monitor at the CNRM will contact the PI and study team with information to  
1456 review in preparation for a monitoring visit in accordance with the established schedule outlined in the  
1457 monitoring plan.

1458

1459

During the visit, the regulatory monitor will compare the medical records and research files to the  
1460 protocol documents and submitted forms to verify compliance and accurate data collection. The

1461 regulatory monitor will follow standardized procedures according to the established CNRM monitoring  
1462 plan.

1463

1464

1465 ***Safety Analysis Plan***

1466

1467 **Confidentiality Protections (for research records and data):**

1468 See sections titled 'Data Management' and 'Managing Data (Data Management and/or Sharing  
1469 Plan) for this Study'.

1470

1471 **Potential Benefits:**

1472 Participants may benefit from participation in this study in terms of a reduction in clinical  
1473 insomnia symptoms due to eCBT-I intervention. However, this benefit cannot be guaranteed as no  
1474 psychological therapies are universally effective. This study is likely to yield important information about  
1475 the feasibility and efficacy of eCBT-I intervention in regards to insomnia with history of TBI that could  
1476 inform future clinical guidance. Participants will also receive additional clinical assessments not part of  
1477 their standard care that can be shared with their primary physician or mental health provider if requested  
1478 by the participant.

1479

1480 **Privacy for Participants:**

1481 Records of participant participation in this research study may only be disclosed in accordance  
1482 with state and federal law, including the Federal Privacy Act, 5 U.S.C.552a, and its implementing  
1483 regulations. DD Form 2005, Privacy Act Statement - Military Health Records, contains the Privacy Act  
1484 Statement for the records.

1485

1486 Procedures will be taken to protect the confidentiality and privacy of study participants. Upon providing  
1487 verbal and written electronic informed consent, participants will be assigned a coded study ID. The coded  
1488 study ID will be used to mask personal information such as name and other identifiable information in  
1489 research records. A Master List linking the real names of participants with coded study IDs will be kept in  
1490 a locked office and file cabinet or in an electronic database located behind a secure firewall. Only  
1491 approved study personnel will have access to information that could be used to distinguish or trace an  
1492 individual's identity. Study collaborators and vendors at the University of Virginia, Qualtrics, and  
1493 Amazon Web Services will not have access to identifiable participant information.

1494

1495 Data collected during this study will be shared with CNRM. This data will not contain any identifiable  
1496 information. Representatives of CNRM, USU, the Henry M. Jackson Foundation (HJF), and NIH may  
1497 have access to study data for audit purposes. We may share unidentifiable data with outside investigators  
1498 or collaborators. This data may be used for a variety of research purposes that we may not be able to  
1499 specify at this time.

1500

1501 Researchers will make every effort to protect participant privacy and confidentiality; however, there are  
1502 always risks of breach of information security and information loss. Complete confidentiality cannot be  
1503 promised for military personnel, because information regarding participants may be required to be  
1504 reported to appropriate medical or command authorities to ensure the proper execution of the military  
1505 mission, including evaluation of fitness for duty.

1506

1507 **Incidental or Unexpected Findings:**

1508 It is possible that during execution of the protocol we will encounter participants with potential  
1509 imminent danger or findings that ethically require immediate action. This information may be revealed  
1510 during the course of the initial screening interview or at subsequent follow up assessments during the  
1511 period of the study. If a research staff member has any information indicating that the participant may be



1512 in danger, dangerous to themselves, or dangerous to others, the Safety Monitoring Plan will be initiated.  
1513 The incidental or unexpected findings will be reported to IRB within 48 hours. As appropriate and at the  
1514 recommendation of the PI and/or the IRB, the participant will be directed to local resources. If judged  
1515 necessary by IRB in order to protect the welfare of the participant or another person, confidentiality may  
1516 be breached as part of the referral process. The participant may also be advised or removed from  
1517 participation in the study if there is evidence of safety concern to the participant or others. The study team  
1518 is not obligated to report results to military or civilian authorities unless there is evidence of imminent  
1519 danger to the participant or others.

1520

## 1521 **STUDY MONITORING**

### 1522 **Data Monitoring Plan:**

1523 Data monitoring will be coordinated by the study data manager. The data manager will supervise  
1524 data collection ensuring accuracy and participant protection on an ongoing basis. The data manager will  
1525 review all data collection forms on an ongoing basis, to include: (1) quality assurance of assessments and  
1526 forms for completeness, (2) quality assurance of electronically entered data, (3) integrity checks of coded  
1527 research records determining variables are within expected ranges, (4) quality assurance of documents for  
1528 proper identifier redaction, and (4) protection of databases through the appropriate use of secure networks  
1529 and password protection. The PI will ensure that all analyses are completed and disseminated.

1530

1531 For additional information regarding data security, see sections titled ‘Data Management’ and  
1532 ‘Managing Data (Data Management and/or Sharing Plan) for this Study’.

1533

### 1534 **Safety Monitoring Plan:**

1535 See section titled ‘Measures to Minimize Risks of Harm (Precautions, Safeguards)’.

1536

## 1537 **REPORTABLE EVENTS**

### 1538 **Reportable Events:**

1539

#### 1540 *Adverse Events (Expected)*

1541 Expected adverse events which are not serious will be reported on the Continuing Review  
1542 Progress Report. More frequent Progress Reports may be provided based on the discretion of the IRB. A  
1543 summary of adverse events study-wide will be included as part of the Continuing Review Progress  
1544 Report.

1545

#### 1546 *Adverse Events (Unexpected)*

1547 Unexpected, but not serious, adverse events occurring in participants which, in the opinion of the  
1548 PI, are possibly related to participation in the protocol will be reported by the PI within 10 working days  
1549 to the IRB and the CNRM using the same procedure. Unexpected, but not serious, adverse events  
1550 occurring in participants which, in the opinion of the PI, are possibly related to participation AND places  
1551 participants or others at a greater risk of harm that was previously known or recognized in the protocol  
1552 will be reported by the PI within 24 hours of delivery by email or phone to the IRB. Additionally, a  
1553 follow-up written report within 10 business days to the IRB will be completed.

1554

#### 1555 *Serious Adverse Events*

1556 The PI, within 24 hours, will report all serious adverse events (SAE). This is accomplished by  
1557 submitting an adverse event report to the IRB. All serious adverse events will also be reported to CNRM  
1558 within 24 hours of site notification.

1559

#### 1560 *Unanticipated problems*

1561 Unanticipated problems involving risks to subjects or others (UPIRTSOs) will be reported to the  
1562 IRB and CNRM and via email or telephone within 24 hours of discovery and a written follow-up report  
1563 within 10 business days.

1564

#### 1565 *Protocol Deviations*

1566 When a deviation occurs, the investigator will report the occurrence to the IRB. The investigator  
1567 will make the determination whether the deviation meets the criteria for an UPIRTSO. Deviations that are  
1568 determined to be minor will be reported on the CR Progress Report.

1569 Additional information regarding potential risk of adverse events, safety measures, and action  
1570 plans is provided in the section entitled "Risks and Benefits."

1571

#### 1572 **EQUIPMENT/NON-FDA REGULATED DEVICES**

1573 **Does the study involve the use of any unique non-medical devices/equipment?**

1574  Yes  No

1575 Please describe:

1576

#### 1577 **FDA-REGULATED PRODUCTS**

1578 **Will any drugs, dietary supplements, biologics, or devices be utilized in this study?**

1579 Yes

1580

#### 1581 **Reporting Requirements for FDA-regulated research under IND and IDE:**

1582

1583 Active eCBT-I intervention and education control portals will be operated through Sleep Healthy  
1584 Using the Internet (SHUTi). SHUTi is a minimal risk medical device intended to decrease symptoms of  
1585 insomnia through the use of self-guided lifestyle intervention techniques. Although numerous blinded  
1586 clinical trials have demonstrated a strong track record in terms of efficacy and safety, SHUTi has not been  
1587 officially evaluated by FDA.

1588

1589 An abbreviated IDE is proposed for this investigation whereby the study team has confirmed the  
1590 necessary regulatory standards. A full IDE application and interaction with FDA is therefore not required.  
1591 According to 21 CFR 812.2, section (b), all required criteria for the pathway are considered herein:

- 1592 1. The medical device is not currently banned per FDA.
- 1593 2. The device is labeled in accordance with 21 CFR 812.2, Investigational Labeling  
1594 Standards.
- 1595 3. The study team will obtain IRB approval for the proposed investigational plan and has  
1596 presented data to support that the device is not a significant risk device.
- 1597 4. Each participating investigator will obtain from each participating subject verification of  
1598 documented informed consent under 21 CFR 50. A formal waiver of documented consent  
1599 may also be approved by IRB under appropriate circumstances in studies involving  
1600 minimal risk to participants.
- 1601 5. Compliance with monitoring requirements for clinical investigations per 21 CFR 812.46.
- 1602 6. The study team maintains record keeping under standards listed in 21 CFR 812.140(b),  
1603 parts 4 and 5, and makes reports to IRB under 21 CFR 812.150(b), parts 1 through 3 and  
1604 5 through 10.
- 1605 7. The study team maintains record keeping under standards listed in 21 CFR 812.140(a),  
1606 part 3(i), and makes the reports required under 21 CFR 812.150(a), parts 1, 2, 5, and 7.
- 1607 8. The study team will comply with prohibitions listed in 21 CFR 812.7 against promotion  
1608 and other related practices.

1609

1610

**1611 Sponsor (organization/institution/company):**

1612 This study is sponsored by the CNRM, a congressionally-funded affiliate organization of USU,  
1613 and is receiving no funding from industry or other private sources. The CNRM was established as a  
1614 collaborative intramural program in May 2008. As part of the CNRM mission, this study will optimize  
1615 the scientific advantages of comparing military and civilian cohorts, and position the CNRM to transition  
1616 advances in the field of TBI research from civilian studies to military populations.  
1617  
1618

1619 **REFERENCES**

1620

- 1621 1. Ancoli-Israel S, Cole R, Alessi C, Chambers M, Moorcroft W, Pollak CP. 2003. The Role of of  
1622 Actigraphy in the Study of Sleep and Circadian Rythms. *Sleep* 26: 342-92.
- 1623 2. Ancoli-Israel S, Roth T. 1999. Characteristics of insomnia in the United States: results of the  
1624 1991 National Sleep Foundation Survey. I *Sleep* 22(Suppl 2): S347-53.
- 1625 3. Bagalman E. 2015. Health Care for Veterans: Traumatic Brain Injury. Congressional Research  
1626 Service. Access 7 Mar 2018
- 1627 4. Bastien CH, Vallieres A, Morin CM. 2001. Validation of the Insomnia Severity Index as an  
1628 outcome measure for insomnia research. *Sleep Med* 2(4): 297-307.12.
- 1629 5. Bell ML, Kenward MG, Fairclough DL, Horton NJ. 2013. Differential dropout and bias in  
1630 randomised controlled trials: when it matters and when it may not. *BMJ* Jan 21;346:e8668.
- 1631 6. Bencra RM, Peterson MJ. 2008. Insomnia and depression. *Sleep Med* 9(1):S3-S9.
- 1632 7. Blackwell T, Redline S, Ancoli-Israel S et al. 2008. Comparison of Sleep Parameters from  
1633 Actigraphy and Polysomnography in Older Women: The SOF Study. *Sleep* 31(2): 283-291.
- 1634 8. Blevins CA, Weathers FW, Davis MT, Witte TK, Domino JL. 2015. The Posttraumatic Stress  
1635 Disorder Checklist for DSM-5 (PCL-5): Development and initial psychometric evaluation.  
1636 *Journal of Traumatic Stress*, 28, 489-498.
- 1637 9. Buscemi N, Vandermeer B, Friesen C, Bialy L, Tubman M, Ospina M, Klassen TP, Witmans M.  
1638 2005. Manifestations and Management of Chronic Insomnia in Adults. Evidence Report/  
1639 Technology Assessment No. 125. AHRQ Publication No. 05-E021-2. Rockville: Agency for  
1640 Healthcare Research and Quality.
- 1641 10. Butt Z, Lai JS, Rao D, Heinemann AW, Bill A, Cella D. 2013. Measurement of fatigue in cancer,  
1642 stroke, and HIV using the Functional Assessment of Chronic Illness Therapy - Fatigue (FACIT-  
1643 F) scale. *J Psychosom Res* 74(1): 64-8.
- 1644 11. Buysse DJ, Germain A, Moul DE, et al. 2011. Efficacy of brief behavioral treatment for chronic  
1645 insomnia in older adults. *Arch Intern Med*. 171(10): 887-95.
- 1646 12. Buysse DJ, Reynolds, CF III, Monk TH, Berman SR, Kupfer DJ. 1989. The Pittsburgh sleep  
1647 quality index: A new instrument for psychiatric practice and research. *Psychiat Res* 28(2): 193-  
1648 213.
- 1649 13. Bryan CJ. 2013. Repetitive Traumatic Brain Injury (or Concussion) Increases Severity of Sleep  
1650 Disturbance among Deployed Military Personnel. *Sleep* 36(6): 941-946.
- 1651 14. Caldwell JA, Knapik JJ, Lieberman HR. 2017. Trends and factors associated with insomnia and  
1652 sleep apnea in all United States military service members from 2005 to 2014. *J Sleep Res* 26(5):  
1653 665-670.
- 1654 15. Carpenter JS, Andrykowski MA. 1998. Psychometric evaluation of the Pittsburgh Sleep Quality  
1655 Index. *J Psychosom Res* 45(1): 5-13.
- 1656 16. Christensen H, Batterham PJ, Gosling JA, Ritterband LM, Griffiths KM, Thorndike FP, Glozier  
1657 N, O'Dea B, Hickie IB, Mackinnon AJ. 2016. Effectiveness of an online insomnia program  
1658 (SHUTi) for prevention of depressive episodes (the GoodNight Study): a randomised controlled  
1659 trial. *Lancet* 3(4): p333-341.
- 1660 17. Corrigan JD, Bogner J. 2007. Initial reliability and validity of the Ohio State University TBI  
1661 Identification Method. *J Head Trauma Rehabil* 22(6): 318-29.
- 1662 18. Cozza SJ, Benedek DM, Bradley JC, Grieger TA, Nam TS, Waldrep DA. 2004. Topics specific to  
1663 the psychiatric treatment of military personnel. In: Schnurr PP, Cozza SJ, editors. *The Iraq War*  
1664 *Clinician Guide*. edn 2nd. National Center for PTSD and Department of Defense.
- 1665 19. Faraone SV, et al. 2000. The drug-placebo response curve: a new method for assessing drug  
1666 effects in clinical trials. *J Clin Psychopharmacology* 20(6): 673-679.
- 1667 20. Field TA, Beeson ET, Jones LK. 2005. The New ABCs: A Practitioner's Guide to Neuroscience-  
1668 Informed Cognitive-Behavior Therapy. *Journal of Mental Health Counseling*, 37 (3): 206-220.

- 1669 21. Davidson JR, Dawson S, Krsmanovic A. 2017. Effectiveness of Group Cognitive Behavioral  
1670 Therapy for Insomnia (CBT-I) in a Primary Care Setting. *Behav Sleep Med* 2:1-13.
- 1671 22. Davy Z, Middlemass J, Siriwardena AN. 2013. Patients' and clinicians' experiences and  
1672 perceptions of the primary care management of insomnia: qualitative study. *Health Expectations*  
1673 18(5):1371–1383.
- 1674 23. Defense and Veterans Brain Injury Center. 2017. *DoD Worldwide Numbers for TBI*. Retrieved  
1675 from <http://dvbic.dcoe.mil/dod-worldwide-numbers-tbi>
- 1676 24. Demyttenaere K, De Fruyt J. 2003. Getting what you ask for: on the selectivity of depression  
1677 rating scales. *Psychother Psychosom* 72(2): 61-70.
- 1678 25. Devine JK, Scott-Sutherland J, Mullington J, Haack M. 2017. USEFULNESS OF WRIST  
1679 ACTIGRAPHY SLEEP MEASURES IN PREDICTING FATIGUE IN INSOMNIA  
1680 DISORDER. *Sleep* 40(Suppl 1): A154.
- 1681 26. DeViva JC, Zayfert C, Mellman TA. 2004. Factors Associated With Insomnia Among Civilians  
1682 Seeking Treatment for PTSD: An Exploratory Study. *Behav Sleep Med* 2(3): 162-176.
- 1683 27. Epstein DR, Sidan S, Bootzin RR, Belyea MJ. 2012. Dismantling multicomponent behavioral  
1684 treatment for insomnia in older adults: a randomized controlled trial. *Sleep* 35(6): 797-805.
- 1685 28. Gagnon C, Belanger L, Ivers H, Morin CM. Validation of the Insomnia Severity Index in primary  
1686 care. 2013. Validation of the Insomnia Severity Index in primary care. *J Am Board Fam Med*  
1687 26(6): 701-10.
- 1688 29. Geiger-Brown JM, Rogers VE, Liu W, Ludeman EM, Downton KD, Diaz-Abad M. Cognitive  
1689 behavioral therapy in persons with comorbid insomnia: A meta-analysis. 2015. *Sleep Med Rev*  
1690 23: 54-67.
- 1691 30. Germain A, Hall M, Krakow B, Katherine Shear M, Buysse DJ. 2005. A brief sleep scale for  
1692 Posttraumatic Stress Disorder: Pittsburgh Sleep Quality Index Addendum for PTSD. *J Anxiety*  
1693 *Disord* 19(2):233-44.
- 1694 31. Grandner MA, Kripke DF, Yoon I, Youngsted SD. 2006. Criterion validity of the Pittsburgh  
1695 Sleep Quality Index: Investigation in a non-clinical sample. *Sleep Biol Rhythms* 4(2): 129-139.
- 1696 32. Hauri PJ, Wisbey J. 1992. Wrist actigraphy in insomnia. *Sleep* 15: 293-301.
- 1697 33. Hou L, Han X, Sheng P, Tong W, Li Z, Xu D, et al.. 2013. Risk Factors Associated with Sleep  
1698 Disturbance following Traumatic Brain Injury: Clinical Findings and Questionnaire Based Study.  
1699 *PLoS ONE* 8(10): e76087.
- 1700 34. Jacobs GD, Pace-Schott EF, Stickgold R, et al. 2004. Cognitive Behavior Therapy and  
1701 Pharmacotherapy for Insomnia. *Arch Intern Med* 164(17):1888-1896.
- 1702 35. Jackowska M, Ronaldson A, Brown J, Steptoe A. 2016. Biological and psychological correlates  
1703 of self-reported and objective sleep measures. *J Psychosom Res* 84: 52-55.
- 1704 36. Jenkins MM, Colvonen PJ, Norman SB, Afari N, Allard CB, Drummond SPA. 2005. Prevalence  
1705 and Mental Health Correlates of Insomnia in First-Encounter Veterans with and without Military  
1706 Sexual Trauma. *Sleep* 38(10): 1547-1554.
- 1707 37. Ji K, Kang M. 2017. STOP-Bang Questionnaire in Patients with Rapid Eye Movement Sleep  
1708 Behavior Disorder. *Sleep Med Res* 8(2): 102-106.
- 1709 38. Knutson KL, Ryden AM, Mander BA, Van Cauter E. 2006. Role of sleep duration and quality in  
1710 the risk and severity of type 2 diabetes mellitus. *Arch Intern Med* 166:1768–1774.
- 1711 39. Koffel E, Khawaja IS, Germain A. 2016. Sleep Disturbances in Posttraumatic Stress Disorder:  
1712 Updated Review and Implications for Treatment. *Psychiatr Ann* 46(3): 173-176.
- 1713 40. Koffel E, Kuhn E, Petsoulis N, et al. 2016. A randomized controlled pilot study of CBT-I Coach:  
1714 Feasibility, acceptability, and potential impact of a mobile phone application for patients in  
1715 cognitive behavioral therapy for insomnia. *Health Inf J* 24(1): 3-13.
- 1716 41. Kravitz HM, Zheng H, Bromberger JT, Buysse DJ, Owens J, Hall MH. 2015. An Actigraphy  
1717 Study of Sleep and Pain in Midlife Women – The SWAN Sleep Study. 22(7): 710-718.
- 1718 42. Kroenke K, Spitzer RL, Williams JB. 2001. The PHQ-9: validity of a brief depression severity  
1719 measure. *J Gen Intern Med* 16(9): 606-613.

- 1720 43. Kuhn E, Weiss BJ, Taylor KL, Hoffmann JE, et al. 2016. CBT-I Coach: A Description and  
1721 Clinician Perceptions of a Mobile App for Cognitive Behavioral Therapy for Insomnia. *J Clin*  
1722 *Sleep Med* 12(4): 597-606.
- 1723 44. Li, SX, Lam SP, Yu MWM, Zhang J, Wing YK. 2010. Nocturnal sleep disturbances as a  
1724 predictor of suicide attempts among psychiatric outpatients: A clinical, epidemiologic,  
1725 prospective study. *J Clin Psychiatry* 71(11): 1440-1446.
- 1726 45. Margolies SO, Rybarczyk B, Vrana SR, Leszczyszyn DJ, Lynch J. 2013. Efficacy of a Cognitive  
1727 Behavioral Treatment for Insomnia and Nightmares in Afghanistan and Iraq Veterans With  
1728 PTSD. *J Clin Psych* 69(10): 1026-1042.
- 1729 46. Marino M, Li Y, Rueschman MN et al. 2013. Measuring Sleep: Accuracy, Sensitivity, and  
1730 Specificity of Wrist Actigraphy Compared to Polysomnography. *Sleep* 36(11): 1747-1755.
- 1731 47. Mathews EE, Arnedt JT, McCarthy MS, Cuddihy LJ, Aloia MS. 2013. Adherence to Cognitive  
1732 Behavioral Therapy for Insomnia: A Systematic Review. *Sleep Med Rev* 17(6): 453-464.
- 1733 48. Mitchell MD, Gehrman P, Perlis M, Umscheid CA. 2012. Comparative effectiveness of cognitive  
1734 behavioral therapy for insomnia: a systematic review. *MC Fam Pract* 13: 40.
- 1735 49. Morin CM, Belleville G, Bélanger L, Ivers H. 2011. The insomnia severity index: psychometric  
1736 indicators to detect insomnia cases and evaluate treatment response. *SLEEP* 34(5): 601-608.
- 1737 50. Morin CM, Bootzin RR, Buysse DJ, Edinger JD, Espie CA, Lichstein KL. 2006. Psychological  
1738 and behavioral treatment of insomnia: update of the recent evidence (1998–2004) *Sleep* 29:1398–  
1739 1414.
- 1740 51. Morin CM, Culbert JP, Schwartz SM. 1994. Nonpharmacological interventions for insomnia: a  
1741 meta-analysis of treatment efficacy. *Am J Psychiatry* 151(8): 1172-1180.
- 1742 52. Morgenthaler T, Alessi C, Friedman L, Owens J, Kapur V, Boehlecke B et al. 2007. Practice  
1743 parameters for the use of actigraphy in the assessment of sleep and sleep disorders: an update for  
1744 2007. *Sleep* 30: 519–529.
- 1745 53. Mysliwiec V, Gill J, Lee H, Baxter T, Pierce R, Barr TL, Krakow B, Roth BJ. 2013. Sleep  
1746 Disorders in US Military Personnel. *Chest* 144(2): 549-557.
- 1747 54. Nappi CM, Drummond SPA, Hall JMH. 2012. Treating Nightmares and Insomnia in  
1748 Posttraumatic Stress Disorder: A Review of Current Evidence. *Neuropharmacology* 62(2):: 576-  
1749 585.
- 1750 55. Naqappa M, Liao P, Wong J, et al. 2015. Validation of the STOP-Bang Questionnaire as a  
1751 Screening Tool for Obstructive Sleep Apnea among Different Populations: A Systematic Review  
1752 and Meta-Analysis. *PLoS One* 10(12): e0143697.
- 1753 56. O'Brien P and Flemming T. 1979. A multiple testing procedure for clinical trials. *Biometrics*  
1754 35:549-556.
- 1755 57. Okajima I, Komada Y, Inoue Y. 2010. A meta analysis on the treatment effectiveness of  
1756 cognitive behavioral therapy for primary insomnia. *Sleep and Biological Rhythms* 9(1): 24-34.
- 1757 58. Parthasarathy S, Vasquez MM, Halonen M, et al. 2015. Persistent Insomnia is Associated with  
1758 Mortality Risk. *Am J Med* 128(3): 268-275.e2.
- 1759 59. Percileous P. 2016. Parametric joint modeling for longitudinal and survival data (Doctoral thesis).  
1760 School of Computing Sciences. University of East Anglia, UK. Accessed at  
1761 <https://ueaeprints.uea.ac.uk/id/eprint/59673>
- 1762 60. Peters S et al. 2012. Multiple imputation of missing repeated outcome measurements did not add  
1763 to linear mixed-effects models. *J Clin Epidem* 65(6): 686-695.
- 1764 61. Phillips B, Mannino DM. 2007. Do insomnia complaints cause hypertension or cardiovascular  
1765 disease? *J Clin Sleep Med* 3:489–494.
- 1766 62. Ponsford JL, Ziino C, Parcell DL, Shekleton JA, Roper M, Redman JR, Phipps-Nelson J,  
1767 Rajaratnam S. 2012. Fatigue and Sleep Disturbance Following Traumatic Brain Injury - Their  
1768 Nature, Causes, and Potential Treatments. *J Head Trauma* 27(3): 224-233.
- 1769 63. President's Commission on Care for America's Returning Wounded Warriors. 2007. *Serve,*  
1770 *support, simplify: Report of the President's commission on care for America's returning wounded*

- 1771 *warriors, in President's Commission on Care of America's Returning Wounded Warriors.*  
1772 Retrieved from Veterans for America Website.
- 1773 64. Revel FG, Gottowik J, Gatti S, Wettstein JG, Moreau JL. 2009. Rodent models of insomnia: a  
1774 review of experimental procedures that induce sleep disturbances. *Neurosci Biobehav Rev*  
1775 33:874–899.
- 1776 65. Ribeiro JD, Pease JL, Gtuerrez PM, Silva C, Berenert RA, Rudd MD, Joiner TE. 2012. Sleep  
1777 problems outperform depression and hopelessness as cross-sectional and longitudinal predictors  
1778 of suicidal ideation and behavior in young adults in the military. *J Affective Dis* 136(3): 743-750.
- 1779 66. Riedal B, Lichstein KL, Peterson BA, Means MK, Epperson MT, Aguillarel RN. 1998. A  
1780 comparison of the efficacy of stimulus control for medicated and nonmedicated insomniacs.  
1781 *Behavior Modification* 22: 3-28.
- 1782 67. Riemann D, Voderholzer U. 2003. Primary insomnia: a risk factor to develop depression? *J*  
1783 *Affective Dis* 76(1-3): 255-259.
- 1784 68. Richardson GS. 2007. Human physiological models of insomnia. *Sleep Med* 8 Suppl. 4:S9–S14
- 1785 69. Ritterband LM, Thorndike FP, Gonder-Frederick LA, Magee JC, Bailey ET, Saylor DK, Morin  
1786 CM. 2009. Efficacy of an Internet-based behavioral intervention for adults with insomnia. *Arch*  
1787 *Gen Psychiatry* 66(7): 692-8.
- 1788 70. Ritterband LM et al. 2017. Effect of a web-based cognitive behavior therapy for insomnia  
1789 intervention with 1-year follow-up. *JAMA Psychiatry* 74(1): 68-75.
- 1790 71. Robins JM et al. 2000. Marginal structural models and causal inference in epidemiology.  
1791 *Epidemiology* 11(5): 550-560.
- 1792 72. Roth T. 2007. Insomnia: Definition, Prevalence, Etiology, and Consequences. *J Clin Sleep Med*  
1793 3(5 Suppl): S7-S10.
- 1794 73. Sack RL, Auckley D, Auger RR, Carskadon MA, Wright KP, Vitiello MV, et al. 2007. Circadian  
1795 rhythm sleep disorders: part II, advanced sleep phase disorder, delayed sleep phase disorder, free-  
1796 running disorder, and irregular sleep- wake rhythm. *Sleep* 30: 1484-501.
- 1797 74. Sadeh A. 2011. The role and validity of actigraphy in sleep medicine: An update. *Sleep Med Rev*  
1798 15(4): 259-267.
- 1799 75. Siebern AT, Manber R. 2011. New developments in cognitive behavioral therapy as the first-line  
1800 treatment of insomnia. *Psychol Res Behav Manag* 4: 21-28.
- 1801 76. Singareddy R, Vgontzas AN, Fernandez-Menodoza J, Liao D, Calhoun, Shaffer ML, Bixler EO.  
1802 2012. Risk factors for incident chronic insomnia: A general population prospective study. *Sleep*  
1803 *Med* 13(4): 346-353.
- 1804 77. Spielman AJ, Saskin P, Thorpy MJ. 1987. Treatment of chronic insomnia by restriction of time in  
1805 bed. *Sleep* 10(1): 45-56.
- 1806 78. Stepanski EJ, Wyatt JK. 2003. Use of sleep hygiene in the treatment of insomnia. *Sleep Med Rev*  
1807 7(3): 215-225.
- 1808 79. Stewart WF, Lipton RB, Dowson AJ, Sawyer J. 2001. Development and testing of the Migraine  
1809 Disability Assessment (MIDAS) Questionnaire to assess headache-related disability. *Neurology*  
1810 56(6 Suppl 1): S20-8.
- 1811 80. Swanson TM, Isaacson BM, Cyborski CM, French LM, Tsao JW, Pasquina PF. 2017. Traumatic  
1812 Brain Injury Incidence, Clinical Overview, and Policies in the US Military Health System Since  
1813 2000. *Public Health Reports* 132(2):251-259.
- 1814 81. Taylor DJ, Lichstein KL, Weinstock, Sanford S, Temple JR. 2007. A Pilot Study of Cognitive-  
1815 Behavioral Therapy of Insomnia in People with Mild Depression. *Beh Ther* 38(1): 49-57.
- 1816 82. Taylor DJ, Peterson AL, Pruiksma KE, Young-McCaughan S, Nicholson K, Mintz J, and  
1817 STRONG STAR Consortium. 2017. Internet and In-Person Cognitive Behavioral Therapy for  
1818 Insomnia in Military Personnel: A Randomized Clinical Trial. *Sleep* 40(6): online edition.
- 1819 83. Taylor DJ, Pruiksma KE. 2014. Cognitive and behavioural therapy for insomnia (CBT-I) in  
1820 psychiatric populations: A systematic review. *Int Rev Psychiatry* 26(2): 205-213.

- 1821 84. Taylor DJ, Pruiksma KE, Hale WJ, et al. 2016. Prevalence, Correlates, and Predictors of  
1822 Insomnia in the US Army prior to Deployment. *Sleep* 39(10): 1795-1806.
- 1823 85. Thorndike FP, Ritterband LM, Gonder-Frederick LA, Lord HR, Ingersoll KS, Morin CM. 2013.  
1824 A randomized controlled trial of an internet intervention for adults with insomnia: effects on  
1825 comorbid psychological and fatigue symptoms. *J Clin Psychol* 69(10): 1078-93.
- 1826 86. Turner RM, Ascher LM. 1979. Controlled comparison of progressive relaxation, stimulus control,  
1827 and paradoxical intention therapies for insomnia. *Journal of Consulting and Clinical Psychology*  
1828 47: 500-508.
- 1829 87. Troxel WM, Conrad TS, Germain A, Buysse DJ. 2013. Predictors of treatment response to brief  
1830 behavioral treatment of insomnia (BBTI) in older adults. *J Clin Sleep Med* 9(12): 1281-9.
- 1831 88. Ulmer CS, Bosworth HB, Beckham JC, Germain A, Jeffreys AS, Edelman D, Macy S, Kirby A,  
1832 Voils CI. 2017. Veterans Affairs Primary Care Provider Perceptions of Insomnia Treatment. *J*  
1833 *Clin Sleep Med* 13(8):991-999.
- 1834 89. US Department of Health and Human Services. 2018. *Veterans Crisis Line*. Retrieved from the  
1835 Veterans Crisis Line website.
- 1836 90. Viola-Saltzman M and Watson NF. Traumatic Brain Injury and Sleep Disorders. *Neurol Clin*.  
1837 2012 Nov; 30(4): 1299-1312.
- 1838 91. Wu JQ, Appleman ER, Salazar RD, Ong JC. 2015. Cognitive Behavioral Therapy for Insomnia  
1839 Comorbid With Psychiatric and Medical Conditions: A Meta-analysis. *JAMA Intern Med* 175(9):  
1840 1461-1472.
- 1841



**1842 GLOSSARY**

1843

1844 AE – Adverse Event

1845 ANOVA – Analysis of Variance

1846 AUC – Area Under the Curve

1847 BDI-II – Beck Depression Inventory II

1848 CBT – Cognitive Behavioral Therapy

1849 CBT-I – Cognitive Behavioral Therapy for Insomnia

1850 CNRM – Center for Neuroscience and Regenerative Medicine

1851 CRF – Case Report Form

1852 DHA – Defense Health Agency

1853 DHHS – Department of Health and Human Services

1854 DoD – Department of Defense

1855 EDC – Electronic Data Capture

1856 FACIT-F – Functional Assessment of Chronic Illness Therapy for Fatigue

1857 FITBIR – Federal Interagency Traumatic Brain Injury Research

1858 GUID – Global Unique Identifier

1859 HIPAA – Health Insurance Portability and Accountability Act

1860 HJF – Henry M. Jackson Foundation

1861 IRB – Institutional Review Board

1862 ISI – Insomnia Severity Index

1863 ITT – Intention to Treat

1864 MTF – Military Treatment Facility

1865 mTBI – Mild Traumatic Brain Injury

1866 MANOVA – Multivariate Analysis of Variance

1867 MIDAS – Migraine Disability Assessment Test

1868 NIH – National Institutes of Health

1869 OSA – Obstructive Sleep Apnea

1870 PHI – Protected Health Information

1871 PCL-5 – Posttraumatic Stress Disorder Checklist for DSM-5

1872 PCL-M – Posttraumatic Stress Disorder Checklist Military Version

1873 PHQ-9 – Patient Health Questionnaire-9 for Depression

1874 PI – Principal Investigator

1875 PII – Personal Identifying Information

1876 PSQI - Pittsburgh Sleep Quality Index

1877 PSQI-A – Pittsburgh Sleep Quality Index Addendum for PTSD

1878 RBD – Rapid-Eye Movement Sleep Behavior Disorder

1879 SAE – Serious Adverse Event

1880 TBI – Traumatic Brain Injury

1881 UPIRTSO – Unanticipated Problems Involving Risks to Subjects or Others

1882 USU – Uniformed Services University

1883 VA – Department of Veteran Affairs

# MTBI<sup>2</sup>

---

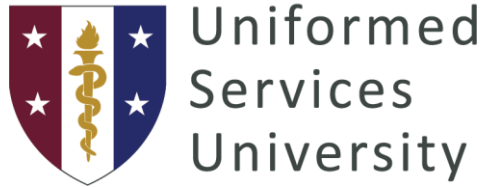

1  
2  
3  
4  
5  
6  
7  
8  
9  
10  
11  
12  
13  
14  
15  
16  
17  
18  
19  
20  
21  
22  
23  
24

**SHUTI**

**SPONSOR: MTBI<sup>2</sup> / USUHS**

**STATISTICAL ANALYSIS PLAN**

**VERSION DATE: September 26, 2022**

**This document is proprietary to MTBI<sup>2</sup>  
It is intended for those specifically authorized to receive it.  
Any other use or disclosure is prohibited.**

25  
26  
27  
28  
29  
30

**ACKNOWLEDGEMENT**

**SPONSOR: MTBI<sup>2</sup>/ USUHS**

**PROTOCOL NUMBER: CNRM-92-9662**

The signatures below indicate that these individuals have reviewed this project-specific statistical analysis plan and acknowledgement this document as governing these particular risks.

Thaddeus Haight, PhD  
**Print Name**  
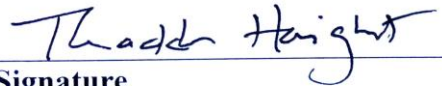  
**Signature**

MTBI<sup>2</sup> Statistician  
**Title**  
9-26-2022  
**Date**

34

David Brody  
**Print Name**  
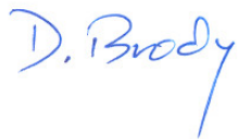  
**Signature**

Principal Investigator (PI)  
**Title**  
26SEPT2022  
**Date**

35  
36  
37  
38

*This analysis plan should be reviewed by all study staff and signed by the PI, acknowledging understanding of study operations and requirements.*

39

## VERSION HISTORY

40 This Statistical Analysis Plan (SAP) for protocol number CNRM-92-9662 is based on protocol  
41 version 1.11.

42

| <b>Version</b> | <b>Date</b> | <b>Description of Change</b>                                                  | <b>Brief Rationale</b>                          |
|----------------|-------------|-------------------------------------------------------------------------------|-------------------------------------------------|
| SAP Version 1  | 09-26-2022  | Initial version of statistical plan developed based on protocol version 1.11. | Statistical plan development based on protocol. |
|                |             |                                                                               |                                                 |
|                |             |                                                                               |                                                 |
|                |             |                                                                               |                                                 |
|                |             |                                                                               |                                                 |
|                |             |                                                                               |                                                 |

43

44

**TABLE OF CONTENTS**

45

46 1. INTRODUCTION ..... 7

47 1.1. Objectives and Endpoints..... 7

48 1.1.1. Objectives ..... 7

49 1.1.2. Endpoints ..... 8

50 1.2. Study Design ..... 9

51 1.3. Randomization and Blinding..... 9

52 2. STATISTICAL HYPOTHESES.....9

53 3. SAMPLE SIZE DETERMINATION ..... 10

54 3.1. Background ..... 10

55 3.2. Sample size calculation for mean difference in ISI score between treatment and control

56 groups..... 10

57 3.3. Sample size calculation for AUC..... 11

58 4. ANALYSIS SETS ..... 12

59 5. GENERAL CONSIDERATIONS ..... 12

60 5.1. Participant Dispositions..... 12

61 5.2. Missing Data ..... 13

62 6. PRIMARY ENDPOINT ANALYSIS..... 14

63 6.1. Definition of Endpoints..... 14

64 6.2. Analytical Approach ..... 14

65 7. SECONDARY ENDPOINT ANALYSIS ..... 16

66 7.1. Definition of Endpoints..... 16

67 7.2. Analytical Approach ..... 17

68 8. EXPLORATORY ANALYSIS ..... 18

69 8.1. Definition of Endpoints..... 18

70 8.2. Analytical Approach ..... 18

71 9. SAFETY ANALYSIS..... 19

72 10. INTERIM ANALYSIS ..... 19

73 11. ADDITIONAL ANALYSES.....19

|    |                                                 |    |
|----|-------------------------------------------------|----|
| 74 | 11.1. Sensitivity analyses of missing data..... | 19 |
| 75 | 12. REFERENCES .....                            | 20 |
| 76 |                                                 |    |
| 77 |                                                 |    |

## ABBREVIATIONS

|     |         |                                                            |
|-----|---------|------------------------------------------------------------|
| 78  |         |                                                            |
| 79  |         |                                                            |
| 80  |         |                                                            |
| 81  |         |                                                            |
| 82  | AE      | Adverse Event                                              |
| 83  | AUC     | Area under the curve                                       |
| 84  | CASA    | CNRM Collection, Access, Sharing and Analytics system      |
| 85  | CNRM    | Center for Neuroscience and Regenerative Medicine          |
| 86  | DSMB    | Data Safety Monitoring Board                               |
| 87  | eCBT-I  | electronic cognitive behavioral therapy for insomnia       |
| 88  | FACIT-F | Functional Assessment of Chronic Illness Therapy – Fatigue |
| 89  | IA      | Interim Analysis                                           |
| 90  | IRB     | Institutional Review Board                                 |
| 91  | ISI     | Insomnia Severity Index                                    |
| 92  | LMM     | Linear Mixed Effects Model                                 |
| 93  | MAR     | Missing at random                                          |
| 94  | MIDAS   | Migraine Disability Assessment                             |
| 95  | MNAR    | Missing not at random                                      |
| 96  | mTBI    | mild traumatic brain injury                                |
| 97  | MTF     | military treatment facility                                |
| 98  | PCL-5   | PTSD Checklist for DSM-5                                   |
| 99  | PHQ-9   | Patient Health Questionnaire-9                             |
| 100 | PSQI    | Pittsburgh Sleep Quality Index                             |
| 101 | SAE     | serious adverse event                                      |
| 102 | SAP     | Statistical Analysis Plan                                  |
| 103 | TBI     | traumatic brain injury                                     |
| 104 |         |                                                            |
| 105 |         |                                                            |
| 106 |         |                                                            |
| 107 |         |                                                            |

108

109

## 1. INTRODUCTION

110 The following document describes the Statistical Analysis Plan (SAP) for the study entitled, A  
111 Randomized, Controlled Study of Internet-guided Cognitive Behavioral Therapy for Insomnia in  
112 Military Traumatic Brain Injury. It is to be used in conjunction with the study design and  
113 statistical plan described in the study protocol. The document makes references to the study  
114 protocol.

### 115 **1.1. Objectives and Endpoints**

#### 116 **1.1.1. Objectives**

117 The objective of the study is to determine the feasibility and efficacy of eCBT-I  
118 compared to an active control condition for primary insomnia in US military service members  
119 with history of TBI.

120

121

#### 122 ***Primary Objective***

123 To evaluate changes in insomnia severity index (ISI) score in an eCBT-I treatment group  
124 versus a sleep education control group in active and retired service members who have insomnia  
125 with a history of TBI.

126

#### 127 ***Secondary Objectives***

- 128 • To assess changes in depression symptom severity as measured by the Patient Health  
129 Questionnaire 9 for Depression (PHQ-9) (Kroenke et al., 2001) with sleep question #3  
130 redacted for redundancy.
- 131 • To assess changes in PTSD-related symptoms as measured by the PTSD Checklist for  
132 DSM-5 (PCL-5) (Belvins et al., 2015).
- 133 • To assess changes in migraine-related symptoms as measured by the Migraine Disability  
134 Assessment (MIDAS) (Stewart et al., 2001).
- 135 • To assess changes in sleep quality as measured by the Pittsburgh Sleep Quality Index  
136 (PSQI) (Germain et al., 2005).
- 137 • To assess changes in fatigue-related symptoms as measured by the Functional  
138 Assessment of Chronic Illness Therapy-Fatigue (FACIT-F) (Butt et al., 2013)

139

#### 140 ***Exploratory Objectives***

- 141 • To assess participant blinding efficacy as measured by believed treatment group  
142 assignment and actual treatment group assignment.
- 143 • To assess participant expectation of benefit of intervention as measured by pre-treatment  
144 and post-treatment questionnaires and changes in ISI score from baseline to post-  
145 intervention.



- 146 • To assess participant likelihood of recommending intervention to friends and family and  
147 changes in ISI score from baseline to post-intervention.
- 148 • To assess participant rating of efficacy of intervention and changes in ISI score from  
149 baseline to post-intervention.
- 150 • To assess participant rating of usability of intervention and changes in ISI score from  
151 baseline to post-intervention.  
152

### 153 1.1.2. Endpoints

#### 154 *Primary Endpoint* 155

- 156 • **Insomnia Severity Index (ISI).** Change in ISI score, where ISI score is measured by a  
157 personally filled questionnaire, between baseline (Day 2-7 of study) and post-treatment  
158 evaluation (Day 71 of study).

#### 159 *Secondary Endpoints* 160

- 161 • **Insomnia Severity Index (ISI).** Change in ISI score, where ISI score is measured by a  
162 personally filled questionnaire, between baseline (Day 2-7 of study) and 3-month follow-  
163 up evaluation (Day 160 of study).
- 164 • **Pittsburgh Sleep Quality Index (PSQI).** Change in PSQI score, where PSQI score is  
165 measured by a personally filled questionnaire, between baseline (Day 2-7 of study) and  
166 post-treatment (Day 71) and 3-month follow-up evaluations (Day 160 of study),  
167 respectively.
- 168 • **PTSD Checklist for DSM-5 (PCL-5).** Change in PCL-5 score, where PCL-5 score is  
169 measured by a personally filled questionnaire, between baseline (Day 2-7 of study) and  
170 post-treatment (Day 71) and 3-month follow-up evaluations (Day 160 of study),  
171 respectively.
- 172 • **Patient Health Questionnaire (PHQ-9).** Change in PHQ-9 score, where PHQ-9 score is  
173 measured by a personally filled questionnaire, between baseline (Day 2-7 of study) and  
174 post-treatment (Day 71) and 3-month follow-up evaluations (Day 160 of study),  
175 respectively.
- 176 • **Migraine Disability Assessment (MIDAS).** Change in MIDAS score, where MIDAS  
177 score is measured by a personally filled questionnaire, between baseline (Day 2-7 of  
178 study) and post-treatment (Day 71) and 3-month follow-up evaluations (Day 160 of  
179 study), respectively.
- 180 • **Functional Assessment of Chronic Illness Therapy – Fatigue (FACIT-F).** Change in  
181 FACIT-F score, where FACIT-F score is measured by a personally filled questionnaire,  
182 between baseline (Day 2-7 of study) and post-treatment (Day 71) and 3-month follow-up  
183 evaluations (Day 160 of study), respectively.  
184  
185  
186  
187

188 **Exploratory Endpoints**

- 189 • **Participant blinding efficacy.** Participant believed treatment group assignment (3-  
190 levels: uncertain, control group, eCBT-I group)
- 191 • **Participant rating of expected treatment benefit.** (3 levels: Low, Moderate, High)
- 192 • **Participant rating of perceived treatment efficacy.** (3 levels: Low, Moderate, High)
- 193 • **Participant rating of perceived treatment usability.** (3 levels: Low, Moderate, High)
- 194 • **Participant rating of likelihood in recommending treatment to family and friends.** (3  
195 levels: Unlikely, Moderately likely, Highly likely)

196

197 **1.2. Study Design**

198 This is an internet-based, controlled, prospective, randomized interventional trial with an  
199 optional open-label treatment. Up to 200 subjects will be randomized to either eCBT-I or sleep  
200 education control groups in a 3:1 ratio, respectively. The study will be entirely internet-based  
201 with no in-person contact between the study team and the participants. At the end of the study,  
202 participants randomized to control will be offered open-label access to the eCBT-I treatment.  
203 The study includes a patient assessment at baseline, a post-treatment assessment at  
204 approximately 9 weeks following consent, and a 3-month follow-up evaluation. Immediately  
205 following the 3-month follow-up evaluation, the study includes an open-label/safety extension  
206 phase of approximately 9 weeks.

207

208 **1.3. Randomization and Blinding**

209 This study minimizes potential bias through use of randomized assignment of treatment group.  
210 Participants will not be formally blinded, but will not be informed which arm, eCBT-I or sleep  
211 education (i.e., control), is expected to be more effective. After signing the informed consent,  
212 participants will be randomized 3:1 to either receive eCBT-I or control, respectively.  
213 Randomization will take place through a centralized database utilizing the CASA system.  
214 Participant information will be entered into the system, and a randomization code will be  
215 provided to the study team. This number will correspond with eCBT-I or control.

216

217 **2. STATISTICAL HYPOTHESES**

218 The primary hypothesis of interest of the study and statistical analysis is that the decrease in ISI  
219 score between the baseline assessment and post-treatment assessment will be *greater* in the  
220 eCBT-I group *relative to* the control group.

221  
222  
223  
224  
225  
226  
227  
  
228  
  
229  
230  
231  
232  
233  
234  
235  
  
236  
237  
  
238  
239  
240  
241  
242  
243  
244  
245  
246  
247  
  
248  
  
249  
250  
  
251

### 3. SAMPLE SIZE DETERMINATION

The study sample size was pre-specified for N=200. Power analyses were applied to assess the sample size needed to detect a significant change in ISI score between eCBT-I vs. control groups that assumed this study N, as well as for varying sample size N < 200.

#### 3.1. Background

Previous reports that have examined ISI with respect to eCBT-I intervention have found significant effects (Ritterband et al., 2009; Ritterband et al., 2017). Given measures of mean difference, and variability of the ISI measure, in these reports, data were simulated and power was evaluated based on different conditions including: (1) sample size (pre-specified for N=200, but investigated for lower N); (2) mean difference in ISI between treatment and control groups; (3) assumed arm imbalance 3:1 vs. 1:1; (4) variability of the outcome measures under evaluation; and (5) study attrition.

#### 3.2. Sample size calculation for mean difference in ISI score between treatment and control groups

To assess if the sample size for the current study was sufficient, we applied power analyses for detection of a significant treatment effect for the primary analysis---i.e., analysis of treatment difference (i.e., treatment vs. control group) in ISI score (9 week – 1 week), using a linear mixed effects model for the effects of interest – i.e.,  $Y \sim \text{Treatment} + \text{Time} + \text{Treatment} \times \text{Time}$ . Power was evaluated with respect to the Treatment x Time effect from this model – i.e., the parameter that would indicate an effect of treatment on change in ISI score (week 9 - week 1), based on a two-sided test and  $\alpha=0.05$ . In this analysis, different conditions were modified to evaluate their respective effects on power. Differences in group means in ISI score were simulated to be close to zero at week 1 and approximately 5 at week 9 (note: Ritterband et al. (2017) reported mean differences of ~ 0 (SD = 5.5) and 5 (SD=5.5) at pre/post-assessment).

**Table 1.** Power estimates of treatment effects pre- and post-treatment (1 week-9 weeks) under different conditions.

| Arm Balance | Mean Difference | Std dev | Total N | Power |
|-------------|-----------------|---------|---------|-------|
| 3:1         | 5               | 5.5     | 200     | 1     |
| 3:1         | 5               | 5.5     | 160     | 1     |
| 3:1         | 5               | 5.5     | 120     | 1     |
| 3:1         | 5               | 8.5     | 200     | 0.99  |
| 3:1         | 5               | 8.5     | 160     | 0.96  |
| 3:1         | 5               | 8.5     | 120     | 0.90  |
| 3:1         | 3               | 5.5     | 200     | 0.95  |
| 3:1         | 3               | 5.5     | 160     | 0.89  |

|     |   |     |     |      |
|-----|---|-----|-----|------|
| 3:1 | 3 | 5.5 | 120 | 0.79 |
| 3:1 | 3 | 8.5 | 200 | 0.64 |
| 3:1 | 3 | 8.5 | 160 | 0.54 |
| 3:1 | 3 | 8.5 | 120 | 0.43 |
| 1:1 | 5 | 8.5 | 200 | 0.99 |
| 1:1 | 5 | 8.5 | 160 | 0.99 |
| 1:1 | 5 | 8.5 | 120 | 0.96 |

252  
253

254 Although the pre-specified study N is 200 (eCBT-I N=150 and control arm N=50, respectively),  
255 the analysis above indicates that the study would still be sufficiently powered given study  
256 attrition. Power would vary under reduced study N given mean difference in ISI score between  
257 the eCBT-I and control groups, and the variability of the ISI score. For example, in Table 1, for  
258 N=120 with a 3:1 arm allocation, given a mean difference in change in ISI score between  
259 treatment and control groups = 3 and ISI score variability in both groups SD = 5.5, the power is  
260 approximately 80%.

261

### 262 3.3. Sample size calculation for AUC

263 Power curves were generated in the case of proposed analyses to examine AUC (see sec 6.2.2  
264 below) assuming different AUC (treatment vs. control responses) for ISI score (note: AUC=0.5  
265 represents no treatment effect). Differences in sample size were compared for the different  
266 curves to reflect potential dropout rates of 0%, 20% and 40% in the study (Fig 1).

267

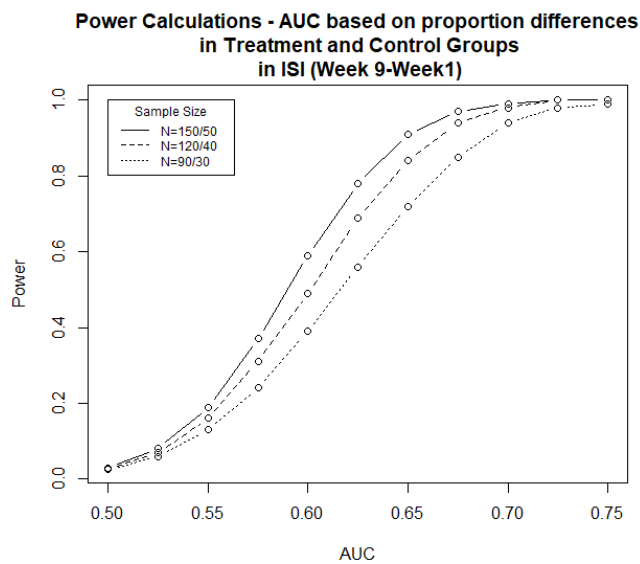

268

269 **Fig 1.** Calculated power of AUC analysis as affected by varying estimated sample size.

270

271

272

#### 4. ANALYSIS SETS

273

274 The full analysis set (FAS) will be participants who are randomized to the study. The efficacy  
275 analysis set, which is a subset of the FAS, will be used to analyze the efficacy endpoints using  
276 intention-to-treat analysis. Therefore, the efficacy analysis set will include all participants with  
277 the primary endpoint measured at the baseline assessment. Participants may or may not be  
278 measured at the post-treatment or 3-month follow-up assessment but nevertheless be included in  
279 the efficacy analysis set. Analysis will be conducted under a missing at random assumption  
280 (MAR) (note: sensitivity analyses will be conducted in the event MAR cannot be assumed), and  
281 based according to the original treatment arm assignment to which each participant was  
282 randomized. The per-protocol analysis set will be a subset of the efficacy analysis set that  
283 includes participants who completed all eCBT-I or sleep education modules ('as-treated'),  
284 completed all assessments (i.e., baseline, post-treatment, 3-month follow-up), and had no major  
285 protocol violations.

286

287

288

#### 5. GENERAL CONSIDERATIONS

289

290 Analysis of the primary outcome of interest in the trial will be to compare changes in ISI score  
291 between Days 2-7 (week 1) and Day 71 (week 9) of the study between the eCBT-I and control  
292 groups. Analysis of secondary outcomes of interest will be to examine change for a variety of  
293 secondary outcome measures between Days 2-7 and Day 71 of the study in the eCBT-I group  
294 and to compare these with changes observed in ISI score. Exploratory analyses will examine  
295 various measures reported by the participants with respect to: 1) perceived treatment assignment;  
296 2) perceived treatment benefit; 3) perceived treatment efficacy; 4) perceived treatment usability;  
297 and 5) patient recommendation of treatment to family and friends, given participants treatment  
298 group assignment.

299

300 Summary descriptive statistics by treatment group will be tabulated at each visit. For continuous  
301 endpoints, descriptive statistics will include number of participants, mean, median, standard  
302 deviation, 25<sup>th</sup> and 75<sup>th</sup> percentiles, minimum and maximum values. For categorical endpoints,  
303 descriptive statistics will include number of participants and percentages.

304

##### 5.1. Participant Dispositions

305 The study population includes male or female military service members or civilians  $\geq 18$  and  $\leq$   
306 64 years of age, with an indication of clinical insomnia for at least 1 month prior to consent (ISI

308 score >14 and PSQI >4), as well as a history of TBI >=6 months prior to consent as documented  
309 in medical records or confirmed by a TBI Screener.

310

311 We provide a schematic outline that describes patient dispositions for the study.

312

313 A. Screened for eligibility

314 a. Included in study

315 b. Excluded from study

316 B. Randomization

317 a. Allocated to placebo

318 i. Received allocated placebo

319 b. Allocated to treatment

320 i. Received allocated treatment

321 C. Follow-up

322 a. Completed Study

323 b. Discontinued Study

324 i. Patient Request

325 ii. Lost to follow-up

326 D. Analysis

327 a. Analysis for Efficacy

328 b. Excluded from analysis

329 c. Safety Analysis

330

331

## 332 **5.2. Missing Data**

333

334 In order to advance through the different eCBT-I training and education modules (online study  
335 portal), participants need to complete weekly assessments related to the primary and some  
336 secondary outcome measures (i.e., ISI, fatigue). Therefore, data will not be missing  
337 intermittently during the trial period (i.e., 1 week - 9 week). However, participants may decide to  
338 drop out of the study before completion of the entire protocol which could result in right  
339 censored or missing data beyond the time point at which participant leaves the trial. Different  
340 analytical strategies will be applied. Descriptive statistics of treatment arm assignment,  
341 demographic data, and baseline assessments related to the primary and secondary outcomes will  
342 be compared in those with and without missing data at follow-up. If the data are missing at  
343 random (i.e., distributions of demographic data and baseline assessments for the missing and  
344 non-missing groups are similar), the current analysis plan utilizing linear mixed-effects models  
345 will be implemented, which essentially imputes the missing values in subjects who are missing  
346 with mean data of subjects who completed the protocol (Peters et al., 2012; Bell et al., 2013;  
347 Carpenter and Smuk, 2021). If data are not missing at random, an analysis of the data utilizing  
348 linear mixed-effects models will still be conducted for the primary and secondary endpoints as  
349 indicated below, in addition to a sensitivity analysis for missing data (See Section 11.1 for  
350 details).

351  
352  
353

## 6. PRIMARY ENDPOINT ANALYSIS

354

### 6.1. Definition of Endpoints

356

#### **Change in ISI score between baseline (Day 2-7) and post-treatment evaluation (Day 71).**

357 The endpoint will be evaluated using a linear mixed effect model (LMM) (see below) that  
358 analyzes the *change* in ISI score between baseline and post-treatment. ISI score is measured at  
359 three different timepoints in the study (baseline, post-treatment, 3-month evaluation). The  
360 analysis assumes that ISI score is normally distributed at each of these timepoints, which will be  
361 evaluated using the Shapiro-Wilk test. If ISI score is not normally distributed, then suitable  
362 transforms will be tested to attempt to normalize the data. If a suitable transform cannot be  
363 found, then non-parametric Mann Whitney U-tests will be performed.

365

366

### 6.2. Analytical Approach

368

369 **6.2.1. Linear Mixed Effects Model (LMM) Analysis.** Analyses will be based on intention-to-  
370 treat (ITT) as it pertains to participant's original group assignment. First, an initial  
371 standard analysis will examine the ISI change between week 1 (pre-treatment) and week  
372 6-9 (post-treatment) between the active and control groups. Assuming ISI measures are  
373 normally distributed, the following mixed model could be applied to assess changes in  
374 ISI score post-intervention compared to pre-intervention in active and control groups:

375

$$376 E[Y_{ijk}|\text{Treatment, Time}] = \alpha_i + \beta_0 + \beta_{1j} \text{Treatment} + \beta_{2k} \text{Time} + \beta_{3jk} \text{Treatment} \times \text{Time} \text{ (Model 1)}$$

377 where  $Y_{ijk}$  represents ISI score in the  $i$ th person,  $j$ th group (1=active, 0=control) and  $k$ th  
378 timepoint (1=6-9 weeks, 0=1 week). Based on the model,  $\beta_1$  represents the mean difference in ISI  
379 score between groups at week 1,  $\beta_2$  represents the mean difference in ISI at 6-9 weeks vs. 1 week  
380 in the control group, and  $\beta_3$  represents the mean difference in ISI score at 6-9 weeks vs. 1 week  
381 in the treatment *relative to* the control group. A two-sided test with  $\alpha=0.05$  would test the  
382 significance of the treatment x time effect represented by the  $\beta_3$  coefficient. Additional  
383 parameters in the model include  $\beta_0$  which represents the mean ISI score in the control group at 1  
384 week and  $\alpha_i$  which represents an individual's random effect to account for within-subject  
385 correlation.

386

387 For efficiency, Model 1 can be extended to include change in ISI between week 1 and the 3-  
388 month evaluation, but can be used to assess the primary endpoint of interest as well. For  
389 example, the LMM

390

$$391 E[Y_{ij}|\text{Treatment}, \text{Time}_1, \text{Time}_2] = \alpha_i + \beta_0 + \beta_{1j} \text{Treatment} + \beta_2 \text{Time}_1 + \beta_3 \text{Time}_2 + \beta_{4j} \text{Treatment} \\ 392 \quad \quad \quad \times \text{Time}_1 + \beta_{5j} \text{Treatment} \times \text{Time}_2 \quad \quad \quad (\text{Model 2})$$

393 includes time indicator variables to represent post-treatment ( $\text{Time}_1$ ) and 3-month ( $\text{Time}_2$ )  
394 assessment periods. Based on the model,  $\beta_1$  represents the mean difference in ISI score between  
395 groups at week 1,  $\beta_2$  represents the mean difference in ISI score at 6-9 weeks vs. 1 week in the  
396 control group,  $\beta_3$  represents the mean difference in ISI score at 3-months vs. 1 week in the  
397 control group,  $\beta_{4j}$  represents the mean difference in ISI score at 6-9 weeks vs. 1 week in the  
398 treatment *relative to* the control group, and  $\beta_{5j}$  represents the mean difference in ISI score at 3-  
399 months vs. 1 week in the treatment *relative to* the control group. For the primary endpoint  
400 analysis, a two-sided test with  $\alpha=0.05$  would test the significance of the treatment x time  
401 effect represented by the  $\beta_{4j}$  coefficient.

402

403 **6.2.2. Area under the Curve (AUC) Analysis.** Given subject-to-subject variability with  
404 respect to completion of the eCBT-I protocol within the treatment window period ranging  
405 between 6 to 9 weeks (i.e., time between baseline assessment and post-treatment  
406 evaluation may vary between participants), an additional analysis of group difference in  
407 ISI score will be examined using area under the curve (AUC). Based on AUC methods  
408 proposed by Faraone et al. (2000), the AUC method applied to the current study would  
409 examine ISI differences (week 6-9 – week 1) - i.e., negative differences would indicate  
410 symptom improvement - between the active and control groups. Specifically, differences  
411 in ISI score (D) for the entire study group would be ranked from lowest (i.e. negative) to  
412 highest (positive differences). For each D, the cumulative percentage of respondents from  
413 the active and control groups would be determined, plotted with respect to y and x axes  
414 representing proportion of respondents in these two groups, and a treatment-response  
415 curve would be drawn. The AUC, measured with respect to this treatment – response  
416 curve, will be examined with respect to  $\text{AUC}=0.5$  (i.e., null difference), as typically  
417 reported in ROC analyses, using a two-sided test and  $\alpha=0.05$ .

418

419

420

421

422

423

424

425

426



427  
428  
429  
430  
431  
432  
433  
434  
435  
436  
437  
438  
439  
440  
441  
442  
443  
444  
445  
446  
447  
448  
449  
450  
451  
452  
453  
454  
455  
456  
457  
458  
459

## 7. SECONDARY ENDPOINT ANALYSIS

### 7.1. Definition of Endpoints

**7.1.1. Change in Insomnia Severity Index (ISI) score between baseline (Day 2-7) and 3-month follow-up evaluation (Day 160).**

**7.1.2. Change in Pittsburgh Sleep Quality Index (PSQI) between baseline (Day 2-7) and post-treatment (Day 71) and 3-month follow-up evaluations (Day 160), respectively.**

**7.1.3. Change in PTSD Checklist for DSM-5 (PCL-5) between baseline (Day 2-7) and post-treatment (Day 71) and 3-month follow-up evaluations (Day 160), respectively.**

**7.1.4. Change in Patient Health Questionnaire (PHQ-9) between baseline (Day 2-7) and post-treatment (Day 71) and 3-month follow-up evaluations (Day 160), respectively.**

**7.1.5. Change in Migraine Disability Assessment (MIDAS) between baseline (Day 2-7) and post-treatment (Day 71) and 3-month follow-up evaluations (Day 160), respectively.**

**7.1.6. Change in Functional Assessment of Chronic Illness Therapy – Fatigue (FACIT-F) between baseline (Day 2-7) and post-treatment (Day 71) and 3-month follow-up evaluations (Day 160), respectively.**

For endpoint 7.1.1, the endpoint will be evaluated using a LMM that analyzes the change in ISI score between baseline and 3-month evaluation. For efficiency, the same model used for the primary endpoint analysis (sec 6.2.1, Model 2) can be used for the secondary endpoint analysis involving ISI. For endpoints 7.1.2 – 7.1.6, the endpoints will be evaluated using LMMs that analyze the change in the respective endpoints between baseline and the 6-9 week and 3-month evaluation periods, respectively. These analyses assume each of the endpoints used in these analyses is normally distributed at each of the different timepoints, which will be evaluated using the Shapiro-Wilk test. If these endpoints are not normally distributed, then suitable transforms will be tested to attempt to normalize the data. If a suitable transform cannot be found, then non-parametric Mann Whitney U-tests will be performed.

460 **7.2. Analytical Approach**

461

462 **7.2.1. Analysis to examine change in ISI score between baseline and 3-month evaluation**  
463 **period.**

464 Analyses will be based on intention-to-treat (ITT) as it pertains to participant’s original group  
465 assignment. For efficiency, the same model used for the primary endpoint analysis (sec 6.2.1,  
466 Model 2) can be used for the secondary endpoint analysis involving ISI:

467

468 
$$E[Y_{ij}|\text{Treatment}, \text{Time}_1, \text{Time}_2] = \alpha_i + \beta_0 + \beta_{1j} \text{Treatment} + \beta_2 \text{Time}_1 + \beta_3 \text{Time}_2 + \beta_{4j} \text{Treatment}$$
  
469 
$$\text{x Time}_1 + \beta_{5j} \text{Treatment x Time}_2 \quad (\text{Model 2})$$

470

471 where  $\beta_{5j}$  represents the mean difference in ISI score at 3-months vs. 1 week in the treatment  
472 *relative to* the control group (See sec 6.2.1 for a description of different parameters included in  
473 the model). To evaluate the secondary outcome change measure for ISI (endpoint 7.1.1), a two-  
474 sided test with  $\alpha=0.05$  would test the significance of the treatment x time effect represented  
475 by the  $\beta_{5j}$  coefficient.

476

477

478 **7.2.2. Analyses to examine change in secondary endpoint measures between baseline, post-**  
479 **treatment and 3-month evaluation periods.**

480 Change in measures considered to be associated with ISI that could potentially be affected by the  
481 eCBT-I intervention will be examined using different models in participants randomized to that  
482 intervention group. Separate analyses will examine change in these secondary endpoint measures  
483 (7.1.2-7.1.6) between baseline and post-treatment and 3-month evaluation periods, respectively.  
484 For example, in the LMM:

485

486 
$$E[Y_i|\text{Time}_1, \text{Time}_2] = \alpha_i + \beta_0 + \beta_1 \text{Time}_1 + \beta_2 \text{Time}_2 \quad (\text{Model 3})$$

487

488 time indicator variables are used to represent post-treatment ( $\text{Time}_1$ ) and 3-month ( $\text{Time}_2$ )  
489 assessment periods. Based on the model,  $\beta_1$  represents the mean change in a given endpoint at 6-  
490 9 weeks vs. 1 week and  $\beta_2$  represents the mean change in the same endpoint at 3-months vs. 1  
491 week. Other model parameters include  $\beta_0$ , which represents the mean of a given endpoint at 1  
492 week (i.e., baseline), and  $\alpha_i$  which represents an individual’s random effect to account for within-  
493 subject correlation. Two-sided tests with  $\alpha=0.05$  will be used to test the parameter estimates  
494  $\beta_1$  and  $\beta_2$ , to assess the significance of the mean change for each given endpoint at post-treatment

495 and the 3-month evaluation, respectively, compared to baseline, in participants assigned to  
496 eCBT-I.

497

### 498 **7.2.3. Spearman correlations of change in ISI and change in secondary endpoints.**

499

500 Separate Spearman correlations will be used to examine the change in ISI and change in  
501 secondary endpoints (7.1.2-7.1.6) for the time period between a) baseline and post-treatment and  
502 b) baseline and the 3-month evaluation, in the eCBT-I and control groups. Two-sided tests of  
503 significance with  $\alpha=0.05$  will be used to assess the significance of each correlation.

504

## **8. EXPLORATORY ANALYSES**

### 505 **8.1. Definition of Endpoints**

506 **8.1.1. Participant blinding efficacy.** (3-levels: uncertain, control group, eCBT-I group)

507 **8.1.2. Participant rating of expected treatment benefit** (3 levels: Low, Moderate, High)

508 **8.1.3. Participant rating of perceived treatment efficacy.** (3 levels: Low, Moderate, High)

509 **8.1.4. Participant rating of perceived treatment usability.** (3 levels: Low, Moderate, High)

510 **8.1.5. Participant rating of likelihood in recommending treatment to family and friends.** (3  
511 levels: Unlikely, Moderately likely, Highly likely)

512

### 513 **8.2. Analytical Approach**

514

515 The study includes different measures of participant perception of the treatment. Each of  
516 these measures will be compared with change in ISI from baseline to post-treatment in the  
517 eCBT-I and control groups. For the expected benefit of treatment measure, analyses will  
518 examine the relationship of change in ISI between baseline and post-treatment and expected  
519 benefit, prior to starting treatment, across the assigned groups (i.e., eCBT-I vs control). The same  
520 relationship will be examined post-intervention also. Other measures (efficacy, usability,  
521 likelihood of recommendation to friend/family member) vs change in ISI, between baseline and  
522 post-treatment, will be examined at post-intervention in the two groups. Lastly, participant  
523 blinding efficacy will be examined by comparing participants' believed group assignment vs.  
524 actual group assignment. The analysis will examine these patient categories against patient  
525 change in ISI between baseline and post-treatment.

526

527

## 9. SAFETY ANALYSIS

528 Data will be collected based on participants' experience of AEs and SAEs. For example, AEs  
529 will be reported for the treatment and control arms as percentage occurrence. If there are a  
530 sufficient number of events, the distribution of AEs will be assessed using chi-square or similar  
531 statistical test of association.

532

533

## 10. INTERIM ANALYSES

534

535 Interim analyses will be conducted with n=100 and n=150 participants, respectively, who  
536 completed the protocol. To maintain a type 1 error = 0.05 and power = 0.9, based on an analysis  
537 of the entire sample (n=200), an alpha-spending approach was applied such that larger critical  
538 values were calculated for the first and second interim analyses required for rejecting the null  
539 hypothesis (i.e., no mean difference in ISI score between active and control groups) (DeMets and  
540 Lan, 1994). These larger critical values correspond with significance tests (p-values) of 0.004  
541 and 0.0196 at the first and second analysis, respectively. The significance test required for the  
542 third (and final) analysis, based on the full sample, is slightly lower ( $p < 0.045$ ) as result of  
543 including the interim analyses. Stopping boundaries were based on methods developed for  
544 sequential design and provide critical values at different stages that would approximate  $\alpha=0.05$   
545 given an analysis of the full sample (O'Brien and Fleming, 1979). Analyses that indicate  
546 significant difference in ISI score plus depression and PTSD scores jointly, between pre- and  
547 post-treatment assessments, based on these reduced p-values, will result in early termination of  
548 the trial due to treatment efficacy. To assess group differences with respect to the joint  
549 distribution of these measures, we will employ multivariate analysis of variance (MANOVA).  
550 Changes in scores for the respective outcome measures will be examined as dependent variables  
551 with respect to group assignment. An overall test, as well as individual tests of difference, of the  
552 dependent measures will be assessed and a decision will be made to terminate the study.

553

554

## 11. ADDITIONAL ANALYSES

555

### 556 11.1. Sensitivity analyses of missing data

557

558 Sensitivity analyses of missing data will occur pending the proportion of participants with  
559 missing data at follow-up is  $> 10\%$  and evidence of informative censoring – i.e., that missing  
560 data at follow-up are related to underlying study characteristics (e.g., demographic, baseline  
561 assessments). Methods are available that model and account for missingness based on observed  
562 study data (e.g. predictors of patients with missing data versus patients without missing data).  
563 Patients who complete the study, who share similar covariate distributions as those with missing  
564 information or are lost-to-follow-up, are up weighted, based on these predictors, to account for  
565 patients without data [Robins, 2002].

566

567 Missing data may occur as the result of unmeasured variables – i.e., variables that are not  
568 collected as part of the study and, therefore, cannot be modeled using available study data. If  
569 required, sensitivity analyses will utilize tipping analysis methods [Yuan, 2014; Mehrotra, 2017].  
570 In tipping analysis, a shift parameter is employed as part of an imputation analysis with the  
571 missing data – e.g., an offset of the treatment effect in participants with missing data relative to  
572 those with complete data. The shift parameter is changed incrementally until inference related to  
573 the intervention changes (e.g., non-significant treatment effect) from the inference based on the  
574 complete (i.e., non-missing) data). If the shift parameter represents a plausible value that results  
575 in a non-significant treatment effect, the study results may need to be reconsidered.

576

577 Inferences based on the efficacy analyses and sensitivity analyses that account for those with  
578 missing data as outlined above will be compared to assess the extent to which missing data may  
579 affect the study findings.

580

581

## 12. REFERENCES

582

583 Bell M. L., Kenward M.G., Fairclough D.L., & Horton N. J. (2013). Differential dropout and  
584 bias in randomized controlled trials: when it matters and when it may not. *BMJ*, 346, e8668.

585 Blevins C. A., Weathers F. W., Davis M. T., Witte T. K., & Domino J. L. (2015). The  
586 Posttraumatic Stress Disorder Checklist for DSM-5 (PCL-5): Development and initial  
587 psychometric evaluation. *Journal of Traumatic Stress*, 28, 489-498.

588 Butt Z., Lai J. S., Rao D., Heinemann A. W., Bill A., & Cella D. (2013). Measurement of fatigue  
589 in cancer, stroke, and HIV using the Functional Assessment of Chronic Illness Therapy - Fatigue  
590 (FACIT-F) scale. *J Psychosom Res*, 74(1): 64-8.

591 Carpenter J.R. & Smuk M. (2021). Missing data: A statistical framework for practice.  
592 *Biometrical Journal*, 1-33.

593 Demets D., & Lan K. (1994). Interim analysis: The alpha spending function approach. *Statistics  
594 in Medicine*, 13, 1341-1352.

595 Faraone S.V., Biederman J., Spencer T.J., & Wilens T.E. (2000). The drug-placebo response  
596 curve: a new method for assessing drug effects in clinical trials. *J of Clin Psychopharmacology*,  
597 20(6): 673-679.

598 Germain A., Hall M., Krakow B., Katherine Shear M., & Buysse D.J. (2005). A brief sleep scale  
599 for Posttraumatic Stress Disorder: Pittsburgh Sleep Quality Index Addendum for PTSD. *J  
600 Anxiety Disord*, 19(2):233-44.

601 Kroenke K., Spitzer R.L., & Williams J.B. (2001). The PHQ-9: validity of a brief depression  
602 severity measure. *J Gen Intern Med*, 16(9): 606-613.

603 O'Brien P.C. & Fleming T.R. (1979). A multiple testing procedure for clinical  
604 trials. *Biometrics*, 35:549–556.

605 Mehrotra D., Liu F., & Permutt T. (2017). Missing data in clinical trials: control-based  
606 imputation and sensitivity analysis. *Pharmaceutical Statistics*, 16:378-392.

607 Percileous P. (2016). Parametric joint modeling for longitudinal and survival data (Doctoral  
608 thesis). School of Computing Sciences. University of East Anglia, UK. Accessed at  
609 <https://ueaeprints.uea.ac.uk/id/eprint/59673>

610 Peters, S.A., Bots, M.L., den Ruijter, H.M., Palmer M.K., Grobbee, D.E., Crouse J.R., ... &  
611 Koffijberg H. The METEOR Study Group. (2012). Multiple imputation of missing repeated  
612 outcome measures did not add to linear mixed-effects models. *Journal of Clinical Epidemiology*,  
613 65(6), 686-695.

614 Ritterband L.M., Thorndike F.P., Gonder-Frederick L.A., Magee J.C., Bailey E.T., Saylor D.K.,  
615 & Morin C.M. (2009). Efficacy of an internet-based behavioral intervention for adults with  
616 insomnia. *Arch Gen Psychiatry*, 2009; 66(7): 692-698.

617 Ritterband L.M., Thorndike F.P., Ingersoll K.S., Lord H.R., Gonder-Frederick L.A., Frederick  
618 C., Quigg M.S., Cohn W.F., & Morin C.M. (2017). Effect of a web-based cognitive behavior  
619 therapy for insomnia intervention with 1-year follow-up. *JAMA Psychiatry*, 74(1): 68-75.

620 Robins, J.M., Hernan M.A., & Brumback B. (2002). Marginal structural models and causal  
621 inference in epidemiology. *Epidemiology*, 11(5), 550-560.

622 Stewart W.F., Lipton R.B., Dowson A.J., & Sawyer J. (2001). Development and testing of the  
623 Migraine Disability Assessment (MIDAS) Questionnaire to assess headache-related disability.  
624 *Neurology*, 56(6 Suppl 1): S20-8.

625 Yuan Y. (2014). Sensitivity analysis in multiple imputation for missing data. SAS Institute Inc.  
626 Paper SAS270-2014.

627
