# Supplementary material for: Internet-Guided Cognitive Behavioral Therapy for Insomnia Among Patients With Traumatic Brain Injury: A Randomized Clinical Trial
Source: PubMed Central journal article supplement (PMC11234237; doi:10.1001/jamanetworkopen.2024.20090), 2024-07-09
Supplement: jamanetwopen-e2420090-s002.pdf [file jamanetwopen-e2420090-s002.pdf]

## Supplementary Online Content

Malarkey ME, Fu AJ, Mannan N, et al. Internet-guided cognitive behavioral therapy for insomnia among patients with traumatic brain injury: a randomized clinical trial. *JAMA Netw Open*. 2024;7(7):e2420090. doi:10.1001/jamanetworkopen.2024.20090

**eFigure 1.** Expected Benefit Prior to Starting the Intervention vs Change in ISI From Baseline to Post Intervention

**eFigure 2.** Believed Group Assignment vs Change in ISI From Baseline to Post Intervention

**eFigure 3.** Participant Ratings of the Intervention vs Change in ISI From Baseline to Post Intervention

**eFigure 4.** Interaction Between Sleep Medication Use and Group Assignment in Effects on ISI

**eFigure 5.** As-Treated Analyses of Primary and Key Secondary Outcome Measures Involving Only Participants Who Completed All Online Modules and All Assessments

**eFigure 6.** Correlations Between Changes in Self-Reported Insomnia and Changes in PTSD Symptom Severity, With Spearman  $\rho$  Values

**eFigure 7.** Correlations Between Changes in Self-Reported Insomnia and Changes in Self-Reported Sleep Quality, With Spearman  $\rho$  Values

**eFigure 8.** Correlations Between Changes in Self-Reported Insomnia and Changes in Self-Reported Fatigue Impact, With Spearman  $\rho$  Values

**eFigure 9.** Correlations Between Changes in Self-Reported Insomnia and Changes in Migraine-Related Disability, With Spearman  $\rho$  Values

**eTable 1.** Demographic Characteristics of Participants Who Completed Immediate Post Intervention Follow-Up Evaluations

**eTable 2.** Demographic Characteristics of Participants Who Completed 3-Month Follow-Up Evaluations

**eTable 3.** Baseline Clinical Scores for Participants Who Completed vs Were Missing Immediate Postintervention Follow-Up Evaluations

**eTable 4.** Baseline Clinical Scores for Participants Who Completed vs Were Missing 3-Month Post-Intervention Follow-Up Evaluation

**eTable 5.** Demographics for Participants Who Completed vs Were Missing Immediate Post-Intervention Follow-Up Evaluations

**eTable 6.** Demographics for Participants Who Completed vs Were Missing at 3-Month Post Intervention Follow-Up Evaluations

**eMethods.** Statistical Analysis

**eAppendix.** Additional Limitations

**eReferences**

This supplementary material has been provided by the authors to give readers additional information about their work.

**eFigure 1.** Expected Benefit Prior to Starting the Intervention vs Change in ISI From Baseline to

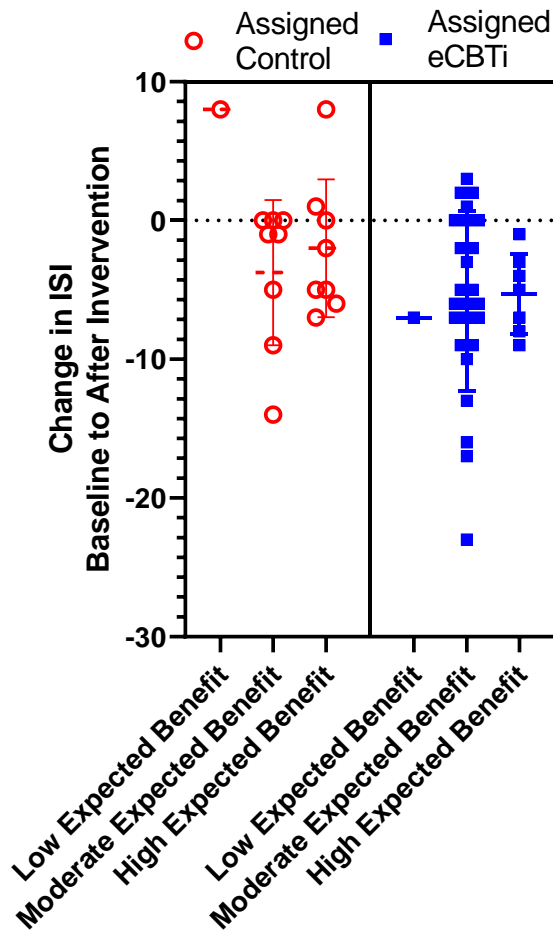

Post Intervention

No significant differences between participants with moderate vs. high expected benefit.

**eFigure 2.** Believed Group Assignment vs Change in ISI From Baseline to Post Intervention

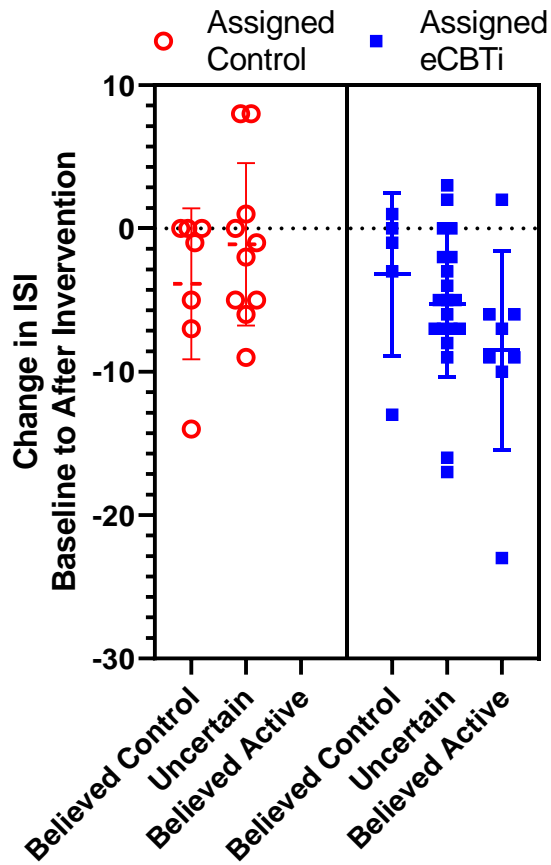

Participants who believed they had received the active intervention also reported greater decreases in insomnia than those who were uncertain or believed they had received the control intervention. No participants who were assigned to control believed that they had been assigned to the active intervention, though 5 participants assigned to active intervention believed that they had been assigned to control.

**eFigure 3.** Participant Ratings of the Intervention vs Change in ISI From Baseline to Post Intervention

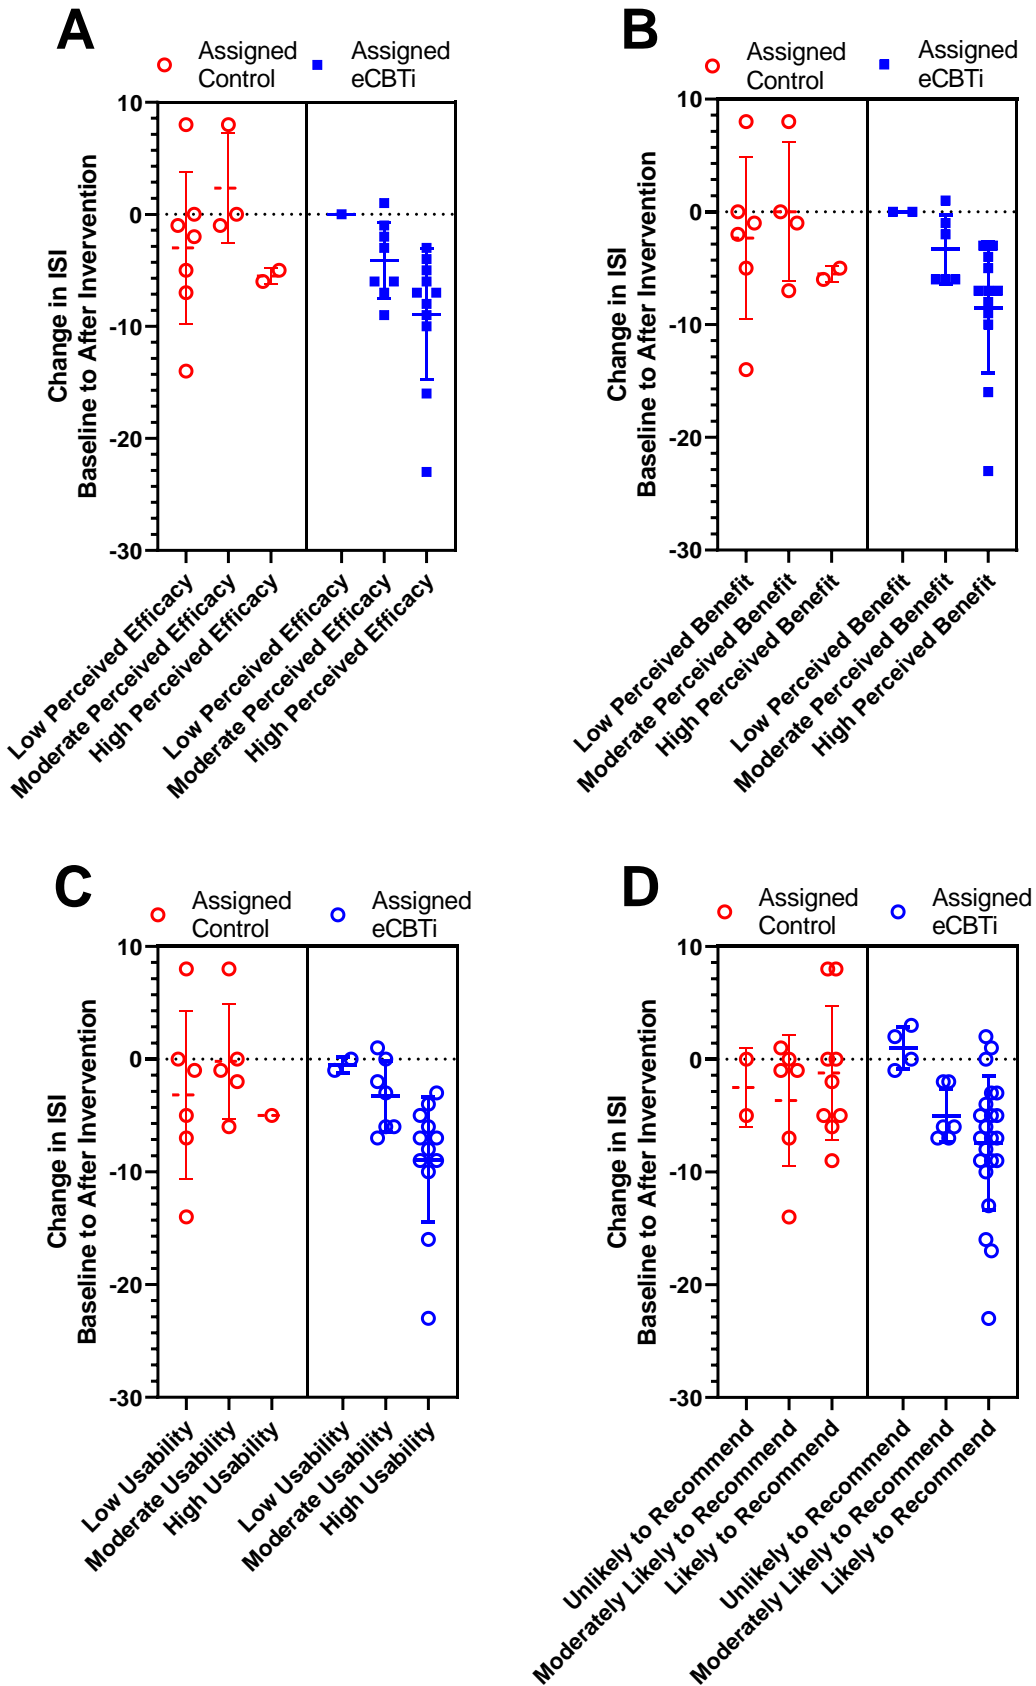

**A.** Efficacy, **B.** Perceived benefit, **C.** Usability, **D.** Likelihood of recommending the intervention to friends and family.

**eFigure 4.** Interaction Between Sleep Medication Use and Group Assignment in Effects on ISI

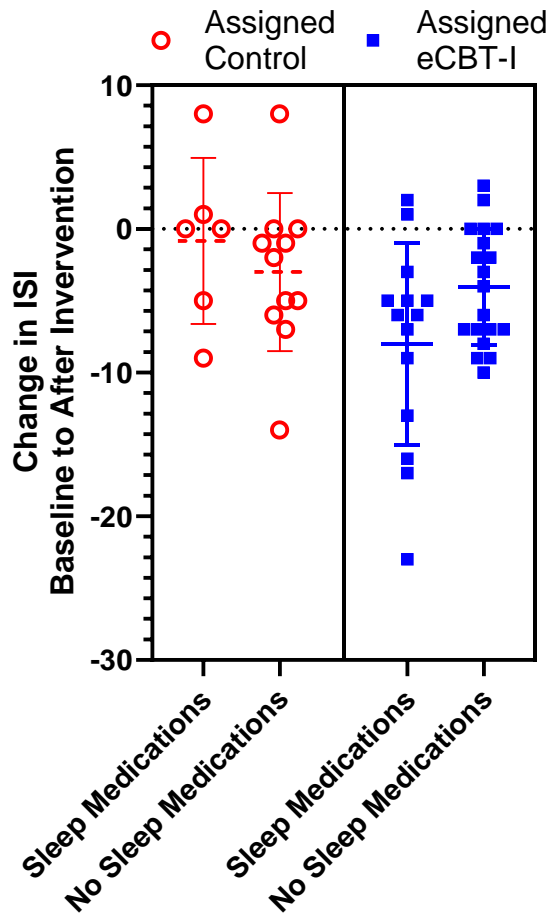

There were reductions in ISI in those assigned to eCBT-I with and without sleep medication use. A two-way ANOVA using sleep medication use (yes vs. no) and group assignment (eCBT-I vs. control) demonstrated a significant main effect of group assignment favoring eCBT-I ( $F_{1,46}=5.8$ ,  $p=0.0199$ ), no significant main effect of sleep medication use ( $F_{1,46}=0.27$ ,  $p=0.60$ ), and no significant interaction ( $F_{1,46}=3.2$ ,  $p=0.079$ ). Medications reported for sleep included clonazepam, eszopiclone, gabapentin, medical marijuana, melatonin, prazosin topiramate, trazodone, and zolpidem.

**eFigure 5.** As-Treated Analyses of Primary and Key Secondary Outcome Measures Involving Only Participants Who Completed All Online Modules and All Assessments

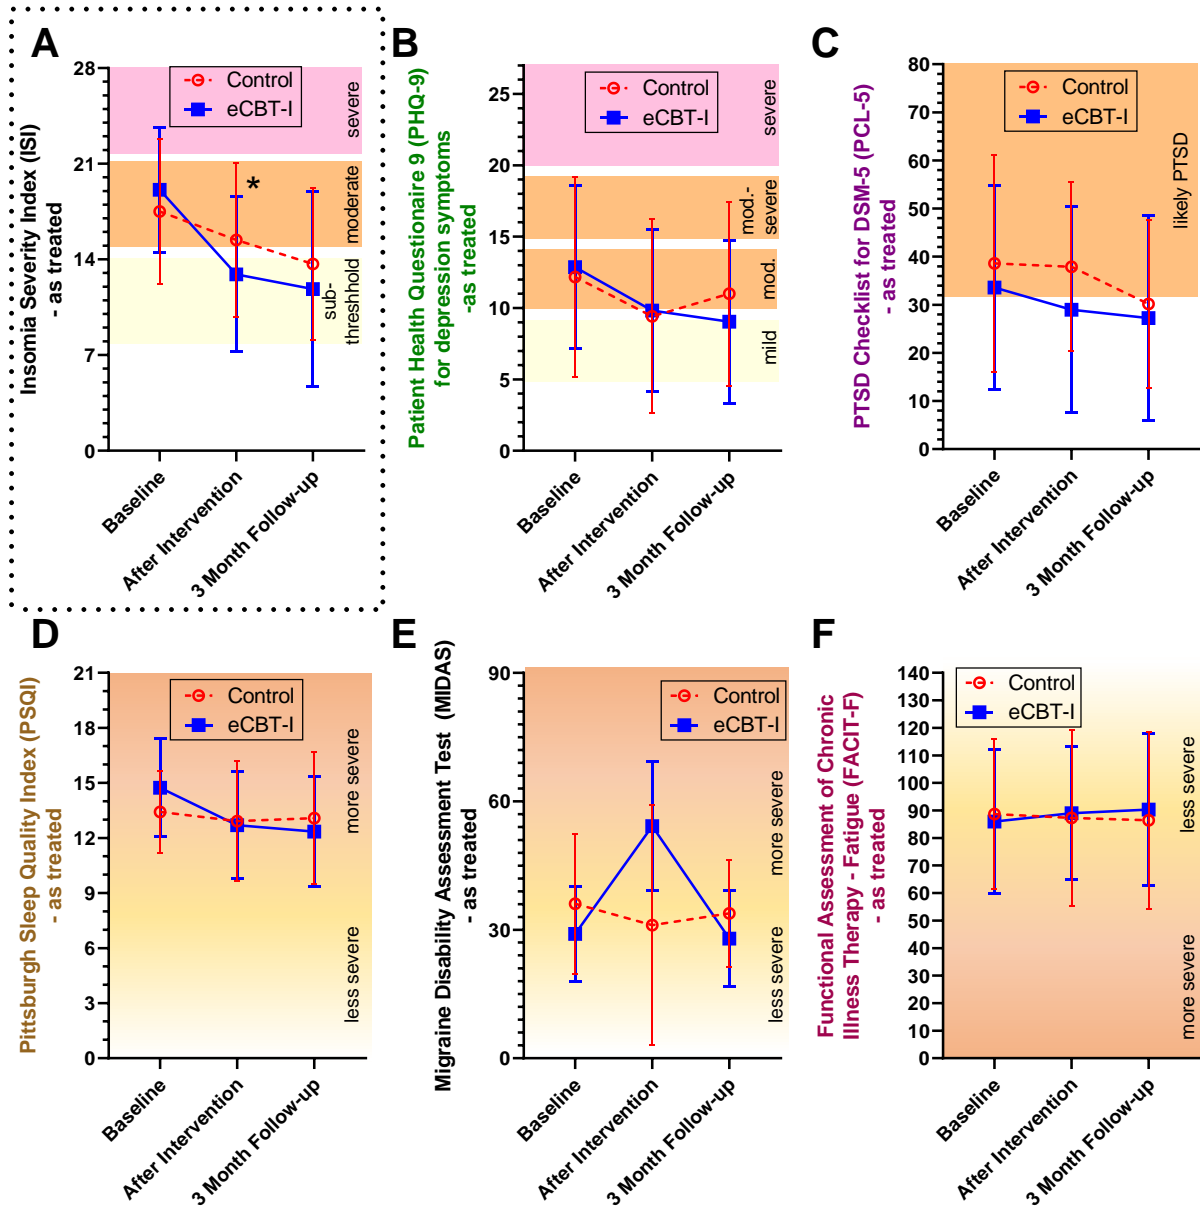

**A.** Self-reported insomnia severity, the primary outcome measure, **B.** Depression symptom severity, **C.** PTSD symptom severity, **D.** Self-reported sleep quality, **E.** Migraine-related disability, **F.** Fatigue impact. Data reported as a function of group (eCBT-I vs. education control) and assessment time point. Sample sizes were  $n=23$  and  $n=12$  for the eCBT-I and control groups respectively. Error bars indicate standard deviations. \* indicates  $p<0.05$  difference between groups.

**eFigure 6.** Correlations Between Changes in Self-Reported Insomnia and Changes in PTSD Symptom Severity, With Spearman  $\rho$  Values

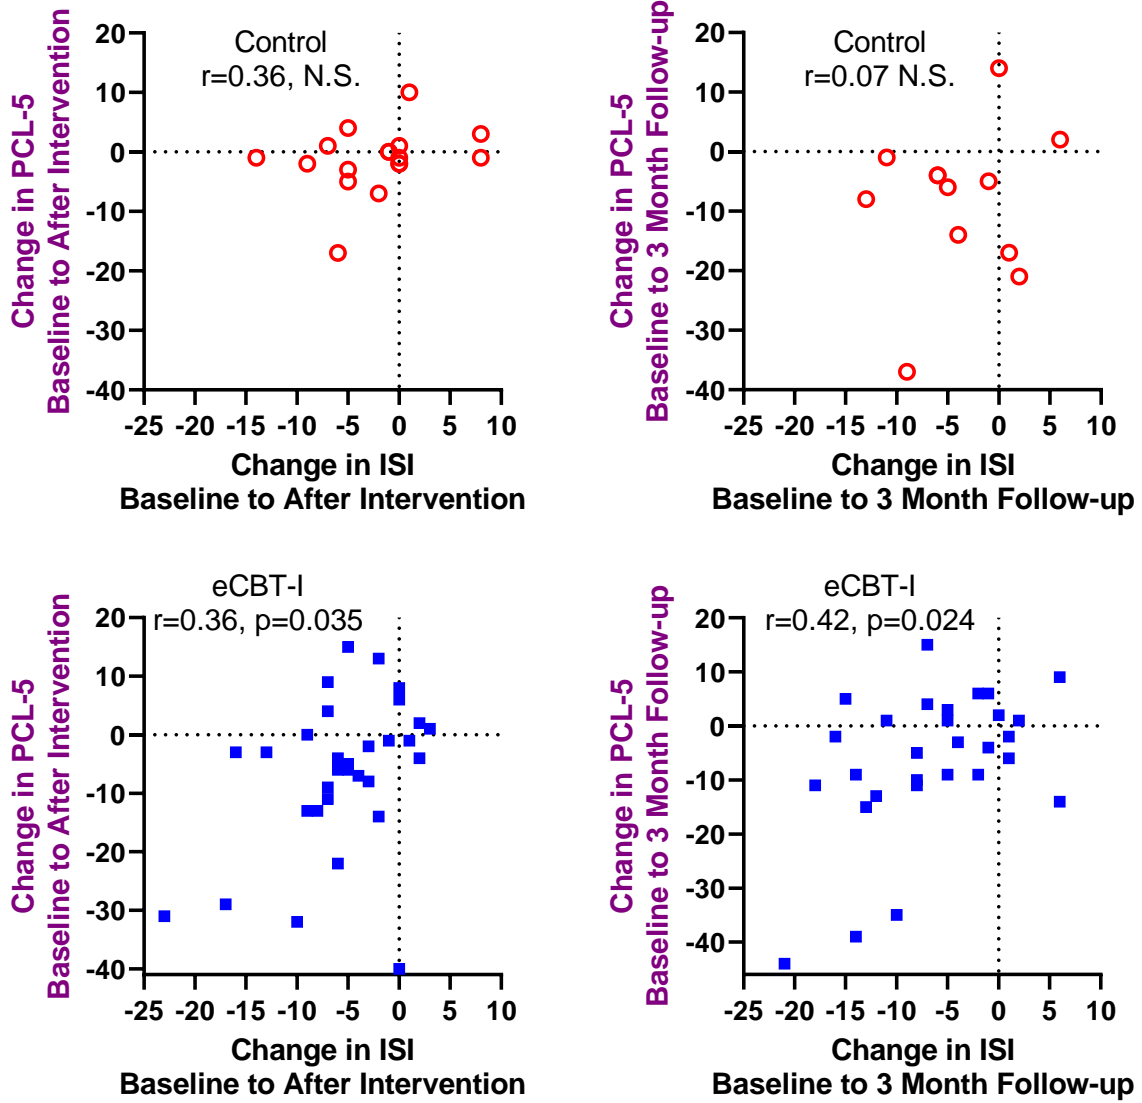



**eFigure 7.** Correlations Between Changes in Self-Reported Insomnia and Changes in Self-Reported Sleep Quality, With Spearman  $\rho$  Values

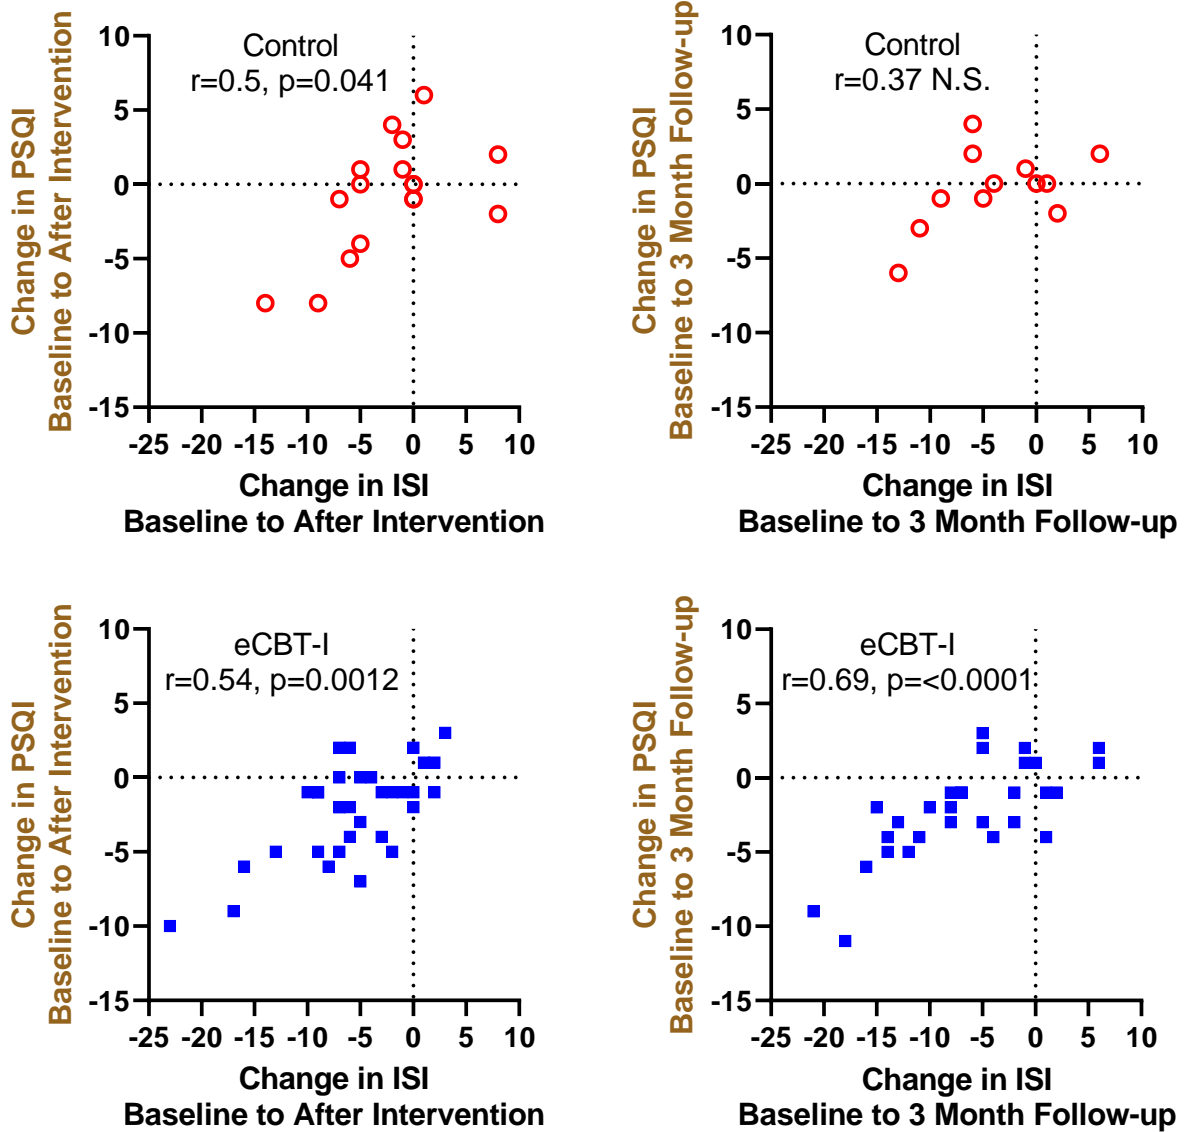

**eFigure 8.** Correlations Between Changes in Self-Reported Insomnia and Changes in Self-Reported Fatigue Impact, With Spearman  $\rho$  Values

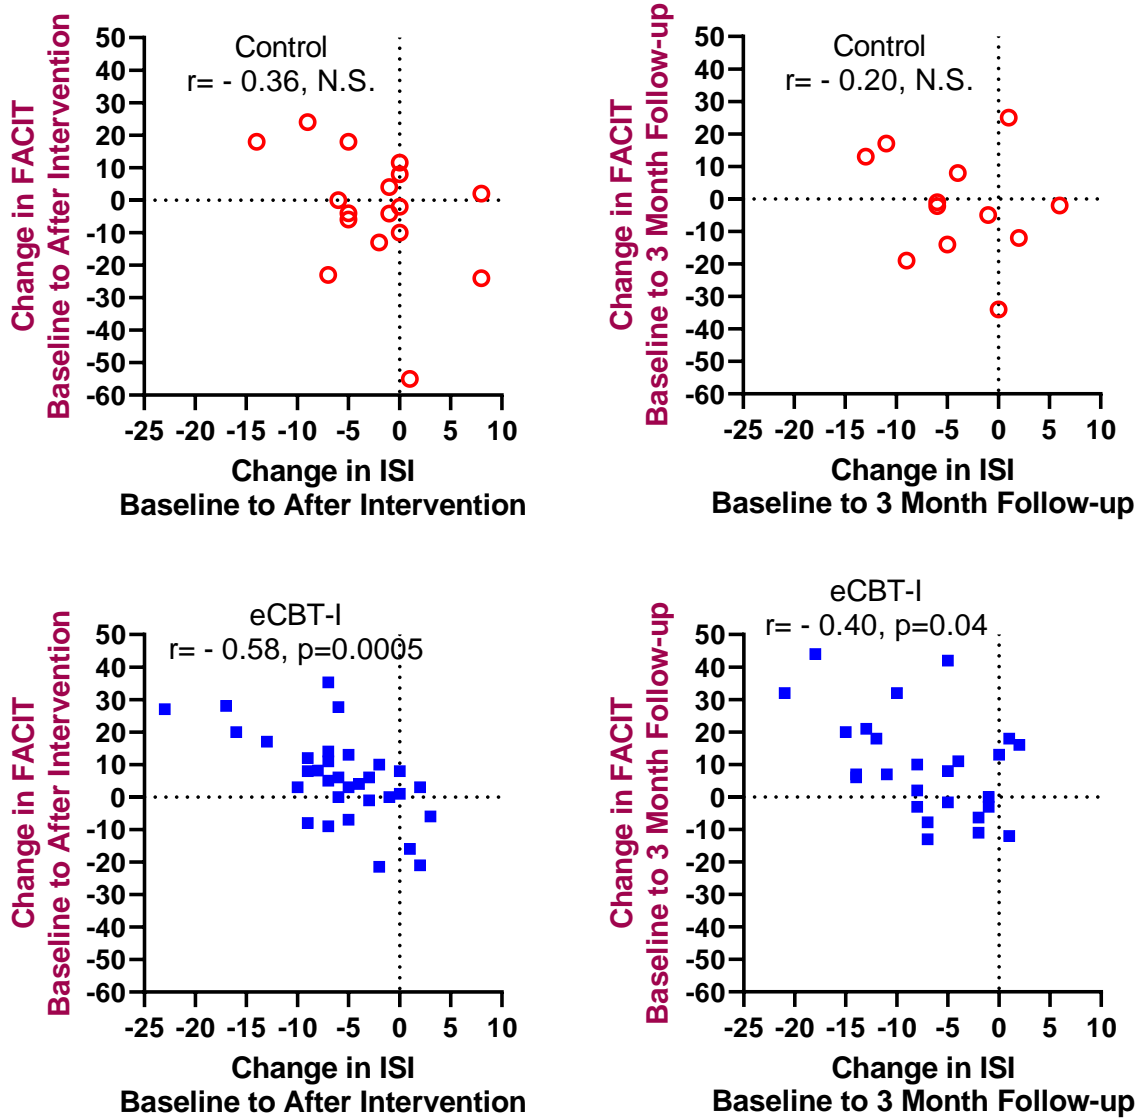

Increased FACIT scores represent improvement in fatigue impact.

**eFigure 9.** Correlations Between Changes in Self-Reported Insomnia and Changes in Migraine-Related Disability, With Spearman  $\rho$  Values

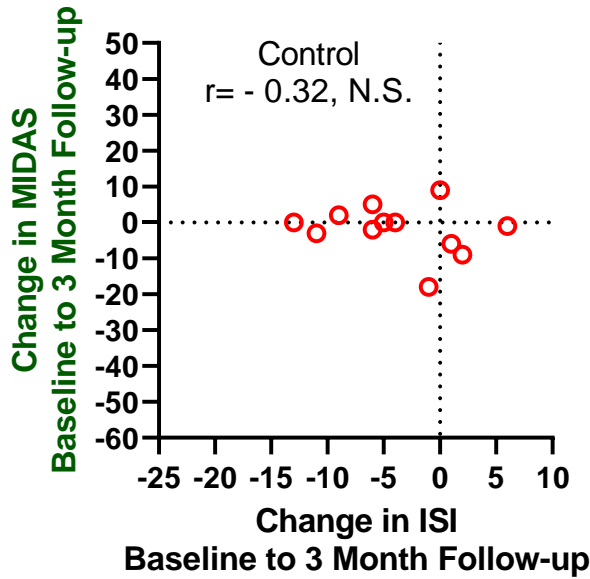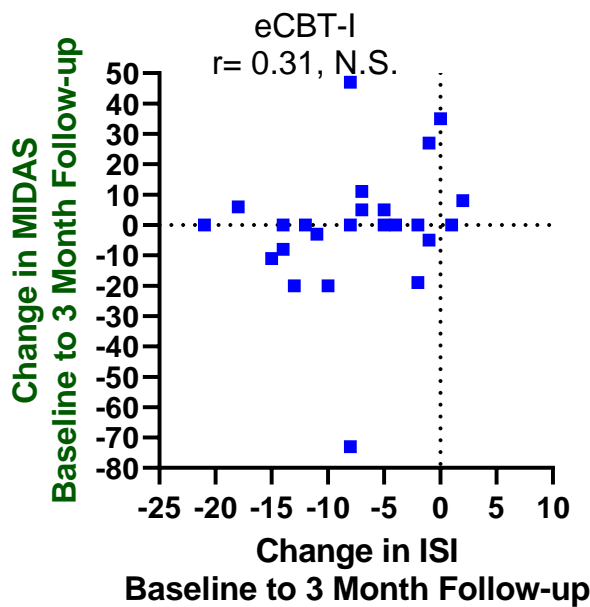

The MIDAS is based on headaches over the previous 90 days, so only changes from baseline to the 3-month follow-up time point are presented. Furthermore, since the MIDAS questions 2 and 4 are often misinterpreted by participants, a modified MIDAS score consisting of the sum of responses to questions 1, 3, and 5 was analyzed.

**eTable 1.** Demographic Characteristics of Participants Who Completed Immediate Post Intervention Follow-Up Evaluations

| Characteristic, No. (%)                   | Control (n = 17) | eCBT-I (n = 33) |
|-------------------------------------------|------------------|-----------------|
| Age, years, mean (SD)                     | 44.06 (11.93)    | 46.45 (8.55)    |
| Female                                    | 2 (11.76%)       | 9 (27.27%)      |
| Race                                      |                  |                 |
| White                                     | 10 (58.82%)      | 26 (78.79%)     |
| Black or African American                 | 2 (11.76%)       | 2 ( 6.06%)      |
| Asian                                     | 1 ( 5.88%)       | 0 ( 0%)         |
| Native Hawaiian or other Pacific Islander | 0 ( 0%)          | 1 ( 3.03%)      |
| Multiple races                            | 2 (11.76%)       | 2 ( 6.06%)      |
| Ethnicity                                 |                  |                 |
| Hispanic or Latino                        | 4 (23.53%)       | 7 (21.21%)      |
| Non-Hispanic or Latino                    | 13 (76.47%)      | 26 (78.79%)     |
| Educational level                         |                  |                 |
| High school degree or less                | 1 ( 5.88%)       | 2 ( 6.06%)      |
| Some college or college degree            | 5 (11.76%)       | 16 (48.48%)     |
| Graduate Degree                           | 11 (64.71%)      | 15 (45.45%)     |
| US Geographic Region                      |                  |                 |
| West                                      | 2 (11.76%)       | 2 ( 6.06%)      |
| Midwest                                   | 0 ( 0%)          | 1 ( 3.03%)      |
| South                                     | 12 (70.59%)      | 22 (66.67%)     |
| Northeast                                 | 0 ( 0%)          | 0 ( 0%)         |
| No response                               | 3 (17.65%)       | 8 (24.24%)      |
| Active Duty v. Retired                    |                  |                 |
| Active Duty                               | 13 (76.47%)      | 24 (72.73%)     |
| Retired                                   | 4 (23.53%)       | 9 (27.27%)      |
| Employment Status                         |                  |                 |
| Full-time                                 | 12 (70.59%)      | 24 (72.73%)     |
| Part-time                                 | 0 ( 0%)          | 2 ( 6.06%)      |
| Unemployed                                | 5 (29.41%)       | 7 (21.21%)      |
| Military Branch                           |                  |                 |
| Air Force                                 | 1 ( 5.88%)       | 2 ( 6.06%)      |
| Army                                      | 11 (64.71%)      | 21 (63.64%)     |
| Marine Corps                              | 1 ( 5.88%)       | 5 (15.15%)      |
| Navy                                      | 3 (17.65%)       | 5 (15.15%)      |
| Other                                     | 1 ( 5.88%)       | 0 ( 0%)         |
| Rank                                      |                  |                 |
| Junior Enlisted                           | 5 (29.41%)       | 3 ( 9.09%)      |
| Non-Commissioned Officer                  | 5 (29.41%)       | 10 (30.30%)     |
| Officer                                   | 6 (35.29%)       | 17 (51.52%)     |
| Warrant Officer                           | 0 ( 0%)          | 1 ( 3.03%)      |
| Other                                     | 1 ( 5.88%)       | 1 ( 3.03%)      |
| No response                               |                  | 1 ( 3.03%)      |
| Military Occupation Type                  |                  |                 |
| Combat                                    | 12 (70.59%)      | 22 (66.67%)     |
| Non-Combat                                | 5 (29.41%)       | 11 (33.33%)     |

|                         |            |            |
|-------------------------|------------|------------|
| Baseline ISI, mean (SD) | 18.3 (5.0) | 19.5 (4.1) |
|-------------------------|------------|------------|

No statistically significant differences between groups.

**eTable 2.** Demographic Characteristics of Participants Who Completed 3-Month Follow-Up Evaluations

| Characteristic, No. (%)        | Control cohort (n = 12) | Treatment cohort (n = 29) |
|--------------------------------|-------------------------|---------------------------|
| Age, years, mean (SD)          | 46.58 (11.54)           | 46.90 (8.67)              |
| Female                         | 1 (8.33%)               | 9 (31.03%)                |
| Race                           |                         |                           |
| White                          | 7 (58.33%)              | 21 (72.41%)               |
| Black or African American      | 1 ( 8.33%)              | 3 (10.34%)                |
| Asian                          | 1 ( 8.33%)              | 1 ( 3.45%)                |
| Multiple races                 | 1 ( 8.33%)              | 2 ( 6.90%)                |
| Other                          | 1 ( 8.33%)              | 2 ( 6.90%)                |
| Unknown                        | 1 ( 8.33%)              | 0 ( 0%)                   |
| Ethnicity                      |                         |                           |
| Hispanic or Latino             | 3 (25.00%)              | 5 (17.24%)                |
| Non-Hispanic or Latino         | 9 (75.00%)              | 24 (82.76%)               |
| Educational level              |                         |                           |
| High school degree or less     | 0 ( 0%)                 | 3 (10.34%)                |
| Some college or college degree | 2 (16.67%)              | 11 (37.93%)               |
| Graduate Degree                | 10 (83.33%)             | 15 (51.72%)               |
| US Geographic Region           |                         |                           |
| West                           | 1 ( 8.33%)              | 2 ( 6.90%)                |
| Midwest                        | 0 ( 0.00%)              | 0 ( 0%)                   |
| South                          | 11 (91.67%)             | 19 (65.52%)               |
| Northeast                      | 0 ( 0.00%)              | 0 ( 0%)                   |
| No response                    | 0 ( 0.00%)              | 8 (27.59%)                |
| Active Duty v. Retired         |                         |                           |
| Active Duty                    | 8 (66.67%)              | 20 (68.97%)               |
| Retired                        | 4 (33.33%)              | 9 (31.03%)                |
| Employment Status              |                         |                           |
| Full-time                      | 8 (66.67%)              | 21 (72.41%)               |
| Part-time                      | 0 ( 0%)                 | 3 (10.34%)                |
| Unemployed                     | 4 (33.33%)              | 5 (17.24%)                |
| Military Branch                |                         |                           |
| Air Force                      | 1 ( 8.33%)              | 1 ( 3.45%)                |
| Army                           | 8 (66.67%)              | 19 (65.52%)               |
| Marine Corps                   | 0 ( 0%)                 | 4 (13.79%)                |
| Navy                           | 2 (16.67%)              | 5 (17.24%)                |
| Other                          | 1 ( 8.33%)              | 0 ( 0%)                   |
| Rank                           |                         |                           |
| Junior Enlisted                | 3 (25%)                 | 3 (10.34%)                |
| Non-Commissioned Officer       | 4 (33.33%)              | 6 (20.69%)                |
| Officer                        | 5 (41.67%)              | 16 (55.17%)               |
| Warrant Officer                | 0 ( 0%)                 | 2 ( 6.90%)                |
| Other                          | 0 ( 0%)                 | 1 ( 3.45%)                |
| No Response                    | 0 ( 0%)                 | 1 ( 3.45%)                |
| Military Occupation Type       |                         |                           |
| Combat                         | 9 (75%)                 | 22 (75.86%)               |
| Non-Combat                     | 3 (25%)                 | 7 (24.14%)                |

|                         |            |            |
|-------------------------|------------|------------|
| Baseline ISI, mean (SD) | 19.0 (4.2) | 17.5 (5.3) |
|-------------------------|------------|------------|

There were no statistically significant differences between groups.

**eTable 3.** Baseline Clinical Scores for Participants Who Completed vs Were Missing Immediate Postintervention Follow-Up Evaluations

| Baseline score   | Completed <u>immediate post-intervention</u> follow-up evaluations | Missing <u>immediate post-intervention</u> follow-up evaluations | p-values |
|------------------|--------------------------------------------------------------------|------------------------------------------------------------------|----------|
| ISI              | 19.196 (4.67)                                                      | 19.77 (3.895)                                                    | 0.494    |
| PHQ              | 13.179 (5.88)                                                      | 14.34 (6.095)                                                    | 0.322    |
| PCL              | 37.719 (20.15)                                                     | 41.82 (19.53)                                                    | 0.291    |
| PSQI             | 14.938 (2.83)                                                      | 15.77 (2.42)                                                     | 0.106    |
| FACIT            | 81.94 (25.61)                                                      | 77.59 (25.03)                                                    | 0.377    |
| Log sqrt (MIDAS) | 0.615 (0.195)                                                      | 0.638 (0.246)                                                    | 0.598    |

Mean (SD). P-values based on 2-sided t-tests of differences between groups



**eTable 4.** Baseline Clinical Scores for Participants Who Completed vs Were Missing 3-Month Post-Intervention Follow-Up Evaluation

| Baseline score   | Completed <u>3-month post-intervention</u> follow-up evaluations | Missing <u>3-month post-intervention</u> follow-up evaluations | p-values |
|------------------|------------------------------------------------------------------|----------------------------------------------------------------|----------|
| ISI              | 18.73 (5.28)                                                     | 19.97 (3.925)                                                  | 0.153    |
| PHQ              | 13.01 (7.86)                                                     | 14.276 (5.63)                                                  | 0.296    |
| PCL              | 36.06 (22.56)                                                    | 42.338 (18.66)                                                 | 0.110    |
| PSQI             | 14.39 (2.23)                                                     | 14.98 (2.458)                                                  | 0.002    |
| FACIT            | 84.85 (27.26)                                                    | 76.42 (23.38)                                                  | 0.096    |
| Log sqrt (MIDAS) | 0.58 (0.22)                                                      | 0.65 (0.22)                                                    | 0.116    |

Mean (SD). P-values based on 2-sided t-tests of differences between groups

**eTable 5.** Demographics for Participants Who Completed vs Were Missing Immediate Post-Intervention Follow-Up Evaluations

| Characteristic, No. (%)                   | Completed <u>immediate post-intervention</u> follow-up evaluations | Missing <u>immediate post-intervention</u> follow-up evaluations | p-values                |
|-------------------------------------------|--------------------------------------------------------------------|------------------------------------------------------------------|-------------------------|
| Age, years, mean (SD)                     | 45.64 (9.78)                                                       | 39.46 (10.35)                                                    | 0.001                   |
| Female                                    | 11 (22%)                                                           | 11 (19.64%)                                                      | 0.765                   |
| Race                                      |                                                                    |                                                                  | White v. Other<br>0.727 |
| White                                     | 36 (72%)                                                           | 42 (75%)                                                         |                         |
| Black or African American                 | 4 ( 8%)                                                            | 7 (12.5%)                                                        |                         |
| Asian                                     | 1 ( 2%)                                                            | 2 ( 3.57%)                                                       |                         |
| Native Hawaiian or other Pacific Islander | 1 ( 2%)                                                            | 1 ( 1.79%)                                                       |                         |
| Multiple Races                            | 4 ( 8%)                                                            | 1 ( 1.79%)                                                       |                         |
| Other                                     | 4 ( 8%)                                                            | 3 ( 5.36%)                                                       |                         |
| Ethnicity                                 |                                                                    |                                                                  | 0.765                   |
| Hispanic or Latino                        | 11 (22%)                                                           | 11 (19.64%)                                                      |                         |
| Non-Hispanic or Latino                    | 39 (78%)                                                           | 45 (80.36%)                                                      |                         |
| Educational level                         |                                                                    |                                                                  | 0.024                   |
| High school degree or less                | 3 ( 6%)                                                            | 10 (17.86%)                                                      |                         |
| Some college or college degree            | 21 (42%)                                                           | 30 (53.57%)                                                      |                         |
| Graduate Degree                           | 26 (52%)                                                           | 16 (28.57%)                                                      |                         |
| US Geographic Region                      |                                                                    |                                                                  | South v. Other<br>0.221 |
| West                                      | 4 ( 8%)                                                            | 3 ( 5.36%)                                                       |                         |
| Midwest                                   | 1 ( 2%)                                                            | 1 ( 1.79%)                                                       |                         |
| South                                     | 34 (68%)                                                           | 33 (58.93%)                                                      |                         |
| Northeast                                 | 0 ( 0%)                                                            | 2 ( 3.57%)                                                       |                         |
| No response                               | 11 (22%)                                                           | 17 (30.36%)                                                      |                         |
| Active Duty v. Retired                    |                                                                    |                                                                  | 0.091                   |
| Active Duty                               | 37 (74%)                                                           | 42 (75%)                                                         |                         |
| Retired                                   | 13 (26%)                                                           | 13 (23.21%)                                                      |                         |
| No Response                               |                                                                    | 1 ( 1.79%)                                                       |                         |
| Employment Status                         |                                                                    |                                                                  | 0.728                   |
| Full-time                                 | 36 (72%)                                                           | 42 (75%)                                                         |                         |
| Part-time                                 | 2 ( 4%)                                                            | 3 ( 5.36%)                                                       |                         |
| Unemployed                                | 12 (24%)                                                           | 10 (17.86%)                                                      |                         |

|                          |             |             |        |
|--------------------------|-------------|-------------|--------|
| No Response              |             | 1 ( 1.79%)  |        |
| Military Branch          |             |             |        |
| Air Force                | 3 ( 6.67%)  | 4 ( 7.14%)  | 0.8167 |
| Army                     | 32 (66.67%) | 33 (58.93%) |        |
| Marine Corps             | 6 (13.33%)  | 6 (10.71%)  |        |
| Navy                     | 8 (13.33%)  | 13 (23.21%) |        |
| Other                    | 1 ( 0%)     | 0 ( 0%)     |        |
| Rank                     |             |             |        |
| Junior Enlisted          | 8 (20%)     | 9 (16.07%)  | 0.0917 |
| NCO                      | 15 (40%)    | 28 (50%)    |        |
| Officer                  | 23 (33.33%) | 14 (25%)    |        |
| Warrant Officer          | 1 ( 0%)     | 2 ( 3.57%)  |        |
| Other                    | 2 ( 0%)     | 2 ( 3.57%)  |        |
| No Response              | 1 ( 0%)     | 1 ( 1.79%)  |        |
| Military Occupation Type |             |             |        |
| Combat                   | 34 (68%)    | 39 (69.64%) | 0.8553 |
| Non-Combat               | 16 (32%)    | 17 (30.36%) |        |

P-values based on 2-sided tests of differences between groups. Missing values removed P-values based on chi-square or Fisher's exact test (categorical variables) and t-tests (continuous variables).

**eTable 6.** Demographics for Participants Who Completed vs Were Missing at 3-Month Post Intervention Follow-Up Evaluations

| Characteristic, No., (%)                  | Completed <u>3-month post-intervention</u> follow-up evaluations | Missing <u>3-month post-intervention</u> follow-up evaluations | p-values                |
|-------------------------------------------|------------------------------------------------------------------|----------------------------------------------------------------|-------------------------|
| Age, years, mean (SD)                     | 47.325 (8.95)                                                    | 40.06 (10.50)                                                  | 0.001                   |
| Female                                    | 9 (21.95%)                                                       | 12 (19.05%)                                                    | 0.514                   |
| Race                                      |                                                                  |                                                                | White v. Other<br>0.281 |
| White                                     | 28 (68.29%)                                                      | 49 (77.78%)                                                    |                         |
| Black or African American                 | 4 ( 9.76%)                                                       | 7 (11.11%)                                                     |                         |
| Asian                                     | 2 ( 4.88%)                                                       | 0 ( 0.00%)                                                     |                         |
| Native Hawaiian or other Pacific Islander | 0 ( 0%)                                                          | 2 ( 3.17%)                                                     |                         |
| Multiple Races                            | 3 ( 7.32%)                                                       | 2 ( 3.17%)                                                     |                         |
| Other                                     | 4 ( 9.76%)                                                       | 3 ( 4.76%)                                                     |                         |
| Ethnicity                                 |                                                                  |                                                                | 0.889                   |
| Hispanic or Latino                        | 8 (19.51%)                                                       | 13 (20.63%)                                                    |                         |
| Non-Hispanic or Latino                    | 33 (80.49%)                                                      | 50 (79.37%)                                                    |                         |
| Educational level                         |                                                                  |                                                                | 0.005                   |
| High school degree or less                | 3 ( 7.32%)                                                       | 9 (14.29%)                                                     |                         |
| Some college or college degree            | 13 (31.71%)                                                      | 36 (57.14%)                                                    |                         |
| Graduate Degree                           | 25 (60.98%)                                                      | 18 (28.57%)                                                    |                         |
| US Geographic Region                      |                                                                  |                                                                | South v. Other<br>0.045 |
| West                                      | 3 ( 7.32%)                                                       | 3 ( 4.76%)                                                     |                         |
| Midwest                                   | 0 ( 0%)                                                          | 1 ( 1.59%)                                                     |                         |
| South                                     | 30 (73.17%)                                                      | 38 (60.32%)                                                    |                         |
| Northeast                                 | 0 ( 0%)                                                          | 2 ( 3.17%)                                                     |                         |
| No response                               | 8 (19.51%)                                                       | 19 (30.16%)                                                    |                         |
| Active Duty v. Retired                    |                                                                  |                                                                | 0.238                   |
| Active Duty                               | 28 (68.29%)                                                      | 50 (79.37%)                                                    |                         |
| Retired                                   | 13 (31.71%)                                                      | 12 (19.05%)<br>1 ( 1.59%)                                      |                         |
| Employment Status                         |                                                                  |                                                                | 0.444                   |
| Full-time                                 | 29 (70.73%)                                                      | 48 (76.19%)                                                    |                         |
| Part-time                                 | 3 ( 7.32%)                                                       | 2 ( 3.17%)                                                     |                         |
| Unemployed                                | 9 (21.95%)                                                       | 12 (19.05%)                                                    |                         |
| No Response                               |                                                                  | 1 ( 1.59%)                                                     |                         |

|                          |             |             |       |
|--------------------------|-------------|-------------|-------|
| Military Branch          |             |             |       |
| Air Force                | 2 ( 4.88%)  | 6 ( 9.52%)  | 0.705 |
| Army                     | 27 (65.85%) | 37 (58.73%) |       |
| Marine Corps             | 4 ( 9.76%)  | 7 (11.11%)  |       |
| Navy                     | 7 (17.07%)  | 13 (20.63%) |       |
| Other                    | 1 ( 2.44%)  | 0 ( 0%)     |       |
| Rank                     |             |             |       |
| Junior Enlisted          | 6 (14.63%)  | 9 (14.29%)  | 0.045 |
| NCO                      | 10 (24.39%) | 31 (49.21%) |       |
| Officer                  | 21 (51.22%) | 18 (28.57%) |       |
| Warrant Officer          | 2 ( 4.88%)  | 1 ( 1.59%)  |       |
| Other                    | 1 ( 2.44%)  | 3 ( 4.76%)  |       |
| No Response              | 1 ( 2.44%)  | 1 ( 1.59%)  |       |
| Military Occupation Type |             |             |       |
| Combat                   | 31 (75.61%) | 41 (65.08%) | 0.256 |
| Non-Combat               | 10 (24.39%) | 22 (34.92%) |       |

P-values based on 2-sided tests of differences between groups. Missing values removed. P-values based on chi-square or Fisher's exact test (categorical variables) and t-tests (continuous variables).

## eMethods. Statistical Analysis

**Power Calculations:** In addition to the power calculations used in the design of the study included in the protocol, we conducted subsequent power calculations using a simulation based on varying target sample sizes. We wanted to assess whether power was maintained even if target sample sizes were smaller than originally expected. These power calculations were based on: 1) original assumptions used in the original study design; 2) 3:1 treatment to control group allocation; 3) type I error rate=0.05 and 2-sided test of the parameter of interest (i.e. difference in change from baseline to post-intervention in mean ISI score between the treatment and control groups); and 4) varying levels of within-subject correlation in ISI scores. Details as they relate to the simulation are described in Fu et al. (2023); *Power Simulation Program: An Adaptable Application for Assessment of Power in Planning and Pre-Data Analysis of Clinical Study Data-An MTBF<sup>2</sup> Study* <https://zenodo.org/records/8436456>.

For the simulation results as they relate to this study (see figure below), we found that for mean differences in change in mean ISI between treatment arms  $\geq 3$ , that power of 0.8 was maintained for a range of sample sizes.

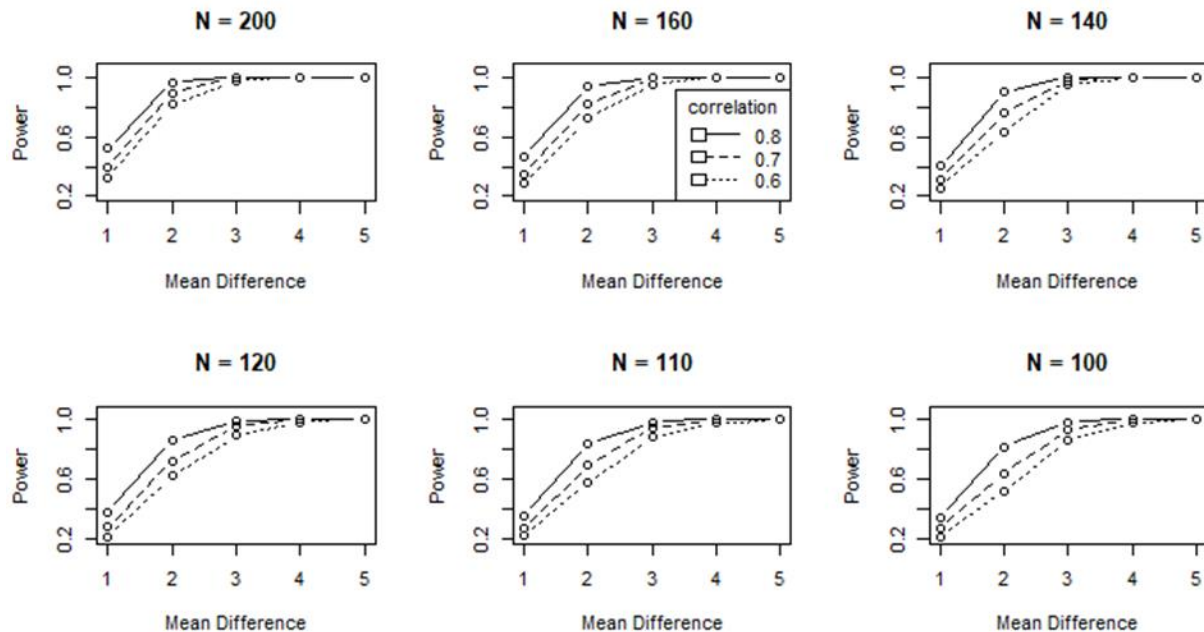

Once the SHUT-I data were collected, prior to the analysis of the study data, we conducted a power analysis given the actual data including the observed mean difference in ISI score for the parameter of interest, the observed variability in the data, and based on the actual observed underlying correlation in ISI score within subjects, using the same power calculation tool as used in the simulation. We assumed a Type I error=0.05, a two-sided test and available study N=106. This analysis indicated that the power based on the actual study data was 0.7.

Given the observed differences in covariate patterns in those missing data vs. those not missing data, we conducted sensitivity analyses to address the differences in attrition rates between the groups. Specifically, we carried out sensitivity analyses as outlined in Section 11.1 of the Statistical Analysis Plan (SAP), using inverse-probability of censoring weight (IPCW) estimation. We assessed the probability of participants missing at follow-up using a pooled logistic model to predict censoring at follow-up, using participants' demographic information available at the baseline visit. We calculated the predicted probability of participants not being censored and used the reciprocal of this to assign weights to any participant with observed data at the follow-up visits, i.e., the smaller the probability of not being censored at follow-up, for example, expected for a younger participant, the greater the weight assigned to a participant with observed data at follow-up of that particular age. We assumed censoring models for different sets of baseline predictors. IPCW(1) included age only and IPCW(2) included age, military rank, and education level as different predictors of loss to follow-up. Distribution of weights are shown below for the different timepoints and across the different covariates found to be associated with missing at follow-up.

Distribution of weights (percentiles) in participants with observed data based on inverse-probability of censoring estimation (min, 25<sup>th</sup>, 50<sup>th</sup>, 75<sup>th</sup>, max).

| Parameter                   | Original Sample* | IPCW (1)                     | IPCW (2)                     |
|-----------------------------|------------------|------------------------------|------------------------------|
| Baseline**                  | NA               | 1,1,1,1,1                    | 1,1,1,1,1                    |
| Follow-up Time1 (immediate) | NA               | 1.14, 1.23, 1.30, 1.41, 1.88 | 1.11, 1.20, 1.28, 1.42, 2.14 |
| Follow-up Time2 (3-months)  | NA               | 1.31, 1.48, 1.65, 1.75, 3.54 | 1.22, 1.42, 1.56, 1.83, 2.68 |

\*No weights were applied in the original analysis of the data—i.e. each participant at each timepoint receives a weight of 1.

\*\*For IPCW (1) and IPCW (2), given all participants in the analysis were observed at baseline, all participants received the same weight at this timepoint.

Model estimates based on analysis of original study data and analyses incorporating IPCW weights

| Parameter       | Original analyses |      |                |         |
|-----------------|-------------------|------|----------------|---------|
|                 | Beta Coefficient  | SE   | 95% CI         | p-value |
| Intercept       | 18.88             | 1.05 | (16.82, 20.94) | 0.001   |
| Treatment       | 0.81              | 1.19 | (-1.52, 3.14)  | 0.501   |
| Time2           | -2.27             | 1.31 | (-4.84, 0.30)  | 0.087   |
| Time3           | -4.48             | 1.49 | (-7.40, -1.56) | 0.003   |
| Treatment*Time2 | -3.49             | 1.58 | (-6.59, -0.39) | 0.027*  |
| Treatment*Time3 | -2.23             | 1.76 | (-5.68, 1.22)  | 0.20    |
|                 |                   |      |                |         |
|                 | IPCW (1)          |      |                |         |
|                 | Beta Coefficient  | SE   | 95% CI         | p-value |
| Intercept       | 18.88             | 1.11 | (16.70, 21.06) | 0.001   |
| Treatment       | 0.81              | 1.26 | (-1.66, 3.28)  | 0.523   |
| Time2           | -2.20             | 1.26 | (-4.71, 0.31)  | 0.086   |
| Time 3          | -4.70             | 1.33 | (-7.31, -2.09) | 0.001   |
| Treatment*Time2 | -3.61             | 1.53 | (-6.61, -0.61) | 0.021*  |
| Treatment*Time3 | -2.69             | 1.62 | (-5.87, 0.49)  | 0.101   |
|                 |                   |      |                |         |
|                 | IPCW (2)          |      |                |         |
|                 | Beta Coefficient  | SE   | 95% CI         | p-value |
| Intercept       | 18.88             | 1.11 | (16.70, 21.06) | 0.001   |
| Treatment       | 0.81              | 1.26 | (-1.66, 3.28)  | 0.523   |
| Time2           | -2.24             | 1.28 | (-4.75, 0.27)  | 0.084   |
| Time 3          | -4.61             | 1.37 | (-7.30, -1.92) | 0.001   |
| Treatment*Time2 | -3.54             | 1.55 | (-6.58, -0.50) | 0.025*  |
| Treatment*Time3 | -2.66             | 1.66 | (-5.91, 0.59)  | 0.114   |

Models for loss to follow-up: IPCW(1) included age only and IPCW(2) included age, military rank, and education level as different predictors of loss to follow-up.

\*Statistically significant effect in primary analysis measure.

The results of these sensitivity analyses indicate there were negligible differences in terms of inference between the original analysis and analyses that accounted for loss-to-follow based on baseline covariates that were found to differ significantly between those who were present at follow-up and those missing at follow-up.



## **eAppendix.** Additional Limitations

Additional limitations include the following:

- We have not fully analyzed the sleep diaries completed by the participants during the study. This analysis will be reported separately and is beyond the scope of the current communication.
- The intervention was designed for a desktop or laptop computer use and may not have been optimally configured for mobile phones or tablets; we do not know what devices were used by the participants.
- We have not directly assessed cognitive performance. We hypothesize that improvements in healthy sleep would correlate with improved cognitive performance but additional studies will be required to test this hypothesis.
- We do not know whether benefits of the military adapted version of SHUT-I would be similar to other digital interventions in the same domain such as “CBT-i Coach” and “Insomnia Coach” (<https://mobile.va.gov/app/insomnia-coach>) from the National Center for Telehealth and Technology <sup>41 42</sup>, or SleepEZ (<https://www.veterantraining.va.gov/insomnia/>) from the US Department of Veterans Affairs; these interventions were not available at the time this study was designed.
- We were unable to collect a comprehensive list of reasons for participants’ decision to drop out of the study; anecdotally, reasons were mainly related to scheduling issues and/or time constraints. It is not clear whether specific demographic factors or randomized group assignment affected feasibility and loss to follow up.
- We have not assessed the immediate post-intervention effects on headache/migraine disability. The MIDAS addresses a 3-month time window, and there was not enough time between baseline and the post intervention time point to allow this assessment. Future studies involving alternative measures will be required to assess for effects on headache/migraine disability in a more granular fashion.

## eReferences

1. Kuhn E, Miller KE, Puran D, et al. A pilot randomized controlled trial of the insomnia coach mobile app to assess its feasibility, acceptability, and potential efficacy. *Behav Ther.* 2022;53(3):440-457. Medline:35473648 doi:10.1016/j.beth.2021.11.003
2. Koffel E, Kuhn E, Petsoulis N, et al. A randomized controlled pilot study of CBT-I Coach: feasibility, acceptability, and potential impact of a mobile phone application for patients in cognitive behavioral therapy for insomnia. *Health Informatics J.* 2018;24(1):3-13. Medline:27354394 doi:10.1177/1460458216656472
