# Supplementary material for: Internet-Guided Cognitive Behavioral Therapy for Insomnia Among Patients With Traumatic Brain Injury: A Randomized Clinical Trial
Source: PubMed Central journal article supplement (PMC11234237; doi:10.1001/jamanetworkopen.2024.20090), 2024-07-09
Supplement: jamanetwopen-e2420090-s003.pdf [file jamanetwopen-e2420090-s003.pdf]

## Data Sharing Statement

Malarkey. Internet-Guided Cognitive Behavioral Therapy for Insomnia Among Patients With Traumatic Brain Injury. *JAMA Netw Open*. Published July 09, 2024.

doi:10.1001/jamanetworkopen.2024.20090

### Data

**Data available:** Yes

**Data types:** Deidentified participant data

**How to access data:** request must be sent to [david.brody@usuhs.edu](mailto:david.brody@usuhs.edu)

**When available:** With publication

### Supporting Documents

**Document types:** None

### Additional Information

**Who can access the data:** anyone requesting the data

**Types of analyses:** for any purpose

**Mechanisms of data availability:** with a signed data access agreement
